# Supplementary material for: Comparative Transcriptomic Analysis of Two Actinorhizal Plants and the Legume Medicago truncatula Supports the Homology of Root Nodule Symbioses and Is Congruent With a Two-Step Process of Evolution in the Nitrogen-Fixing Clade of Angiosperms
Source: Front Plant Sci. 2018 Oct 8;9:1256. doi: 10.3389/fpls.2018.01256 (PMC6187967; doi:10.3389/fpls.2018.01256)
Supplement: Supplementary file 2 [file Table_2.XLSX]

## Sheet: Table-S02
		Raw	post Screen-1	post Screen-2	post Screen-3	post Allelepipe
Ceanothus thyrsiflorus	Total bases	540666827	51236967	46944978	41166345
	Gene count	480254	25965	18723	15515	15245
	Transcript count	675696	36661	26859	22078
	Max length	15881	15881	15881	15881
	Min length	201	201	297	297
	N50	1458	2045	2160	2247
	Average length	800.16	1397.59	1747.83	1864.59
	Median length	408	1118	1497	1613
	% read mapped	98.77	89.39	82.95	76.35
Datisca glomerata	Total bases	500205052	52009887	47734417	45133803
	Gene count	309847	21536	17049	15722	15448
	Transcript count	444766	28970	22696	20780
	Max length	20057	16092	16092	16092
	Min length	224	224	297	297
	N50	2383	2364	2485	2521
	Average length	1124.65	1795.3	2103.21	2171.98
	Median length	493	1546	1832	1895
	% read mapped	97.78	89.3	85.06	81.68
