# Supplementary material for: Comparative Transcriptomic Analysis of Two Actinorhizal Plants and the Legume Medicago truncatula Supports the Homology of Root Nodule Symbioses and Is Congruent With a Two-Step Process of Evolution in the Nitrogen-Fixing Clade of Angiosperms
Source: Front Plant Sci. 2018 Oct 8;9:1256. doi: 10.3389/fpls.2018.01256 (PMC6187967; doi:10.3389/fpls.2018.01256)
Supplement: Supplementary file 3 [file Table_3.XLSX]

## Sheet: Table-S03
		Ceanothus thyrsiflorus	Datisca glomerata	Medicago truncatula (transcriptome)	Medicago truncatula (genome)
Present	Complete (single copy)	0.435417	0.611111	0.655556	0.667361
	Complete (duplicated)	0.132639	0.142361	0.264583	0.271528
	Fragmented	0.0555556	0.06875	0.0159722	0.0159722
	Total	0.623611	0.822222	0.936111	0.954861
Missing		0.376389	0.177778	0.0638889	0.0451389
