# Supplementary material for: Comparative Transcriptomic Analysis of Two Actinorhizal Plants and the Legume Medicago truncatula Supports the Homology of Root Nodule Symbioses and Is Congruent With a Two-Step Process of Evolution in the Nitrogen-Fixing Clade of Angiosperms
Source: Front Plant Sci. 2018 Oct 8;9:1256. doi: 10.3389/fpls.2018.01256 (PMC6187967; doi:10.3389/fpls.2018.01256)
Supplement: Supplementary file 7 [file Table_7.XLSX]

## Sheet: Table-S07
Gene Name	Ortholog			Log2 FC				PCR primer sequence
	MergedOrthoGroup	C. thyrsiflorus	D. glomerata	C. thyrsiflorus		D. glomerata		C. thyrsiflorus		D. glomerata
				RNAseq	qPCR	RNAseq	qPCR	Forward	Reverse	Forward	Reverse
CYP735A	MergedOrthoGroup005893	CtTrNR07514_a1_i1	DgTrNR14821_a1_i1	4.19±0.40	1.85992	2.11±0.16	0.0713876	ATGAATGTGCCAAAGCAAGTCG	CATTAGTAGTTTCTCCACTTCCACT	CTGGGCATGAGACAACTGCT	CCTCAGAGCGAACCCTTTGT
NIN	MergedOrthoGroup008966	CtTrNR12222_a1_i1	DgTrNR00886_a1_i1	6.63±0.93	5.86615	8.45±0.22	8.48275	GGAGATTGTGGATTGGGCCT	TCCCTGTCCTTGGTACAGTCT	CCAAGCTGCACTGACTGAGA	GTAGGTCTGGTCGGAATGGC
NRT1.8	MergedOrthoGroup008002	CtTrNR10682_a1_i1	DgTrNR09643_a1_i1	4.22±0.71	-1.08627	1.91±0.13	0.773792	ACTCTCTATGAGGAAGCTGCAAA	GTAGGCTGCCCTGTCCAAG	CTACTGCCTCGGCTGCTATT	TCACCACCAGGCATCATCTC
RPG	MergedOrthoGroup006667Sub001	CtTrNR14741_a1_i1	DgTrNR05600_a1_i2	5.19±0.34	7.26079	9.69±0.56	1.92041	AAGAGAGTCGAGCCGTTTGG	CCTTCCGCTCCTCCATTTCA	AGAAAGAACGGGACGCCTAC	CGAGCTCCTGCAACTTCTCT
SYMREM	MergedOrthoGroup006520	CtTrNR08408_a1_i1	DgTrNR05672_a1_i1	1.93±0.29	1.59029	6.23±0.22	8.85123	GCCGATCCTGCAAGTGAGAA	GCAGACGCCTTTTTATACGCC	AGCACGAGTTGAAACGGAGA	CGCCTCTACCGATGCTTTCTT
AHK5	MergedOrthoGroup006609	CtTrNR08540_a1_i1	DgTrNR04289_a1_i2	NA (Root specific)	NA (Root specific)	-0.77±0.19	-1.26028	AATGGCACCACGTCTCAAGT	CCACCTCAAGGCGTACTGTT	GACAATGCGGGCAAAGCAAA	CACATCCAAAAGTTGCCGCT
MAX4	MergedOrthoGroup000413	CtTrNR00488_a1_i1	DgTrNR09747_a1_i1	-5.02±0.10	-4.40832	-3.57±0.40	-2.44427	AGGTGGGTTTGAGGATTCGC	TTGCGTCCACAACCAGTGAA	AGGCTATGAAGGTGGGTTTGA	TCTCCACCGAGACAGAATGG
Ubiquitin Ligase	MergedOrthoGroup000503	CtTrNR00591_a1_i1	DgTrNR05871_a1_i2	-0.17±0.06		0.69±0.03		ACTGCTGGAACAAGAGTGGT	TCAGATAAACCGCCCACAGC	GGACAAGTGCAGACCGTGAA	TCGGGACGATTTGTTGCCAT
Glyceraldehyde 3-P Dehydrogenase	MergedOrthoGroup001083	CtTrNR01310_a1_i1	DgTrNR07562_a1_i1	0.58±0.40		0.74±0.04		CGGAAGGATCGGTAGGTTGG	AATGCTTCCACTGACCGTGA	AGCAGAAGGTGGTTGATGCT	GCTCTGTCAGACCAGCAAATG
