# Supplementary material for: Comparative Transcriptomic Analysis of Two Actinorhizal Plants and the Legume Medicago truncatula Supports the Homology of Root Nodule Symbioses and Is Congruent With a Two-Step Process of Evolution in the Nitrogen-Fixing Clade of Angiosperms
Source: Front Plant Sci. 2018 Oct 8;9:1256. doi: 10.3389/fpls.2018.01256 (PMC6187967; doi:10.3389/fpls.2018.01256)
Supplement: Supplementary file 8 [file Table_8.XLSX]

## Sheet: Table-S08a
MergedOrthoGroup ID	Gene name	C. thyrsiflorus	D. glomerata	M. truncatula
MergedOrthoGroup000002		Ct_CtTrNR00002	Dg_DgTrNR13178	Mt_Medtr8g068830
MergedOrthoGroup000003		Ct_CtTrNR00003	Dg_DgTrNR11755	Mt_Medtr1g058490,Mt_Medtr1g060460,Mt_Medtr7g105320
MergedOrthoGroup000004		Ct_CtTrNR00004	Dg_DgTrNR12321	Mt_Medtr7g104870
MergedOrthoGroup000005Sub001		Ct_CtTrNR00005	Dg_DgTrNR09541	Mt_Medtr4g114080
MergedOrthoGroup000005Sub002		Ct_CtTrNR00628	Dg_DgTrNR03345	Mt_Medtr4g114100
MergedOrthoGroup000005Sub003		Ct_CtTrNR00932	Dg_DgTrNR00519,Dg_DgTrNR00520	Mt_Medtr5g020710
MergedOrthoGroup000005Sub004		Ct_CtTrNR03601	Dg_DgTrNR13802	Mt_Medtr4g114105
MergedOrthoGroup000005Sub005		Ct_CtTrNR12331	Dg_DgTrNR00742	Mt_Medtr3g056160,Mt_Medtr5g094700
MergedOrthoGroup000005Sub006		Ct_CtTrNR13528	Dg_DgTrNR07165	Mt_Medtr3g110417
MergedOrthoGroup000006Sub001		Ct_CtTrNR00006	Dg_DgTrNR11386	Mt_Medtr3g091820
MergedOrthoGroup000007		Ct_CtTrNR00007	Dg_DgTrNR13926	Mt_Medtr4g125890,Mt_Medtr5g032050
MergedOrthoGroup000008		Ct_CtTrNR00008	Dg_DgTrNR00994,Dg_DgTrNR00995	Mt_Medtr1g090190
MergedOrthoGroup000010		Ct_CtTrNR00010	Dg_DgTrNR00759	Mt_Medtr4g048590
MergedOrthoGroup000011		Ct_CtTrNR00011	Dg_DgTrNR04949	Mt_Medtr1g018030
MergedOrthoGroup000012Sub001		Ct_CtTrNR04559,Ct_CtTrNR12009	Dg_DgTrNR13377,Dg_DgTrNR13378	Mt_Medtr1g080150
MergedOrthoGroup000013Sub001		Ct_CtTrNR13591	Dg_DgTrNR03760	Mt_Medtr8g076950
MergedOrthoGroup000014Sub001		Ct_CtTrNR00021	Dg_DgTrNR10949	Mt_Medtr1g071730
MergedOrthoGroup000014Sub002		Ct_CtTrNR10689	Dg_DgTrNR01516	Mt_Medtr7g095190
MergedOrthoGroup000015		Ct_CtTrNR00016	Dg_DgTrNR11722	Mt_Medtr6g029230
MergedOrthoGroup000016		Ct_CtTrNR00017,Ct_CtTrNR03035	Dg_DgTrNR11307	Mt_Medtr4g105070
MergedOrthoGroup000017		Ct_CtTrNR00018	Dg_DgTrNR10350	Mt_Medtr4g063630
MergedOrthoGroup000018		Ct_CtTrNR00019	Dg_DgTrNR13988	Mt_Medtr1g107550
MergedOrthoGroup000019		Ct_CtTrNR00020	Dg_DgTrNR03603,Dg_DgTrNR09583	Mt_Medtr5g032420,Mt_Medtr8g068890
MergedOrthoGroup000020		Ct_CtTrNR00022	Dg_DgTrNR03176	Mt_Medtr0204s0010
MergedOrthoGroup000021Sub001		Ct_CtTrNR00023	Dg_DgTrNR07661	Mt_Medtr1g097460
MergedOrthoGroup000021Sub002		Ct_CtTrNR00027	Dg_DgTrNR11366	Mt_Medtr4g073590
MergedOrthoGroup000021Sub003		Ct_CtTrNR00156	Dg_DgTrNR10379	Mt_Medtr2g005260,Mt_Medtr4g081890,Mt_Medtr4g081900
MergedOrthoGroup000021Sub004		Ct_CtTrNR00231,Ct_CtTrNR00793	Dg_DgTrNR02494,Dg_DgTrNR02496	Mt_Medtr7g104900
MergedOrthoGroup000021Sub005		Ct_CtTrNR00243,Ct_CtTrNR11080	Dg_DgTrNR15074	Mt_Medtr1g076720,Mt_Medtr1g076730,Mt_Medtr6g060550
MergedOrthoGroup000021Sub006		Ct_CtTrNR00250	Dg_DgTrNR09299	Mt_Medtr3g465040
MergedOrthoGroup000021Sub007		Ct_CtTrNR00252	Dg_DgTrNR03273	Mt_Medtr3g014010
MergedOrthoGroup000021Sub008		Ct_CtTrNR00256	Dg_DgTrNR12816	Mt_Medtr2g055750
MergedOrthoGroup000021Sub009		Ct_CtTrNR00472	Dg_DgTrNR14426	Mt_Medtr2g019100
MergedOrthoGroup000021Sub010		Ct_CtTrNR00497	Dg_DgTrNR08299	Mt_Medtr3g031280
MergedOrthoGroup000021Sub011		Ct_CtTrNR00541	Dg_DgTrNR09385	Mt_Medtr3g054060,Mt_Medtr5g008890
MergedOrthoGroup000021Sub012		Ct_CtTrNR00669	Dg_DgTrNR12881	Mt_Medtr1g096990
MergedOrthoGroup000021Sub013		Ct_CtTrNR00701	Dg_DgTrNR01573	Mt_Medtr7g055857,Mt_Medtr8g012655
MergedOrthoGroup000021Sub014		Ct_CtTrNR00729	Dg_DgTrNR06149	Mt_Medtr4g071620,Mt_Medtr6g008900
MergedOrthoGroup000021Sub015		Ct_CtTrNR00810	Dg_DgTrNR11224	Mt_Medtr3g435700,Mt_Medtr4g091440,Mt_Medtr8g090375
MergedOrthoGroup000021Sub016		Ct_CtTrNR01010	Dg_DgTrNR04035	Mt_Medtr3g053650,Mt_Medtr3g064810
MergedOrthoGroup000021Sub017		Ct_CtTrNR01034	Dg_DgTrNR12560	Mt_Medtr8g017080
MergedOrthoGroup000021Sub018		Ct_CtTrNR01082	Dg_DgTrNR02854	Mt_Medtr1g083450
MergedOrthoGroup000021Sub019		Ct_CtTrNR01100	Dg_DgTrNR03583	Mt_Medtr2g035950,Mt_Medtr2g035990,Mt_Medtr2g036020,Mt_Medtr3g094890,Mt_Medtr3g094970,Mt_Medtr8g091930
MergedOrthoGroup000021Sub020		Ct_CtTrNR01102	Dg_DgTrNR13014	Mt_Medtr4g057605
MergedOrthoGroup000021Sub021		Ct_CtTrNR01115	Dg_DgTrNR09852	Mt_Medtr4g092620
MergedOrthoGroup000021Sub022		Ct_CtTrNR01157	Dg_DgTrNR06899	Mt_Medtr3g088570
MergedOrthoGroup000021Sub023		Ct_CtTrNR01218	Dg_DgTrNR13452	Mt_Medtr7g112680
MergedOrthoGroup000021Sub024		Ct_CtTrNR01246	Dg_DgTrNR02077	Mt_Medtr3g041720,Mt_Medtr8g036270
MergedOrthoGroup000021Sub025		Ct_CtTrNR01257	Dg_DgTrNR05831,Dg_DgTrNR05832	Mt_Medtr2g087760,Mt_Medtr8g006800
MergedOrthoGroup000021Sub026		Ct_CtTrNR01261	Dg_DgTrNR00377,Dg_DgTrNR10273	Mt_Medtr1g031650,Mt_Medtr4g084280
MergedOrthoGroup000021Sub027		Ct_CtTrNR01308	Dg_DgTrNR07200	Mt_Medtr4g013235,Mt_Medtr7g071440
MergedOrthoGroup000021Sub028		Ct_CtTrNR01329	Dg_DgTrNR05168	Mt_Medtr1g079130,Mt_Medtr1g079140
MergedOrthoGroup000021Sub029		Ct_CtTrNR01369	Dg_DgTrNR05386	Mt_Medtr3g072340
MergedOrthoGroup000021Sub030		Ct_CtTrNR01387	Dg_DgTrNR05785	Mt_Medtr8g012725
MergedOrthoGroup000021Sub031		Ct_CtTrNR01395	Dg_DgTrNR15111	Mt_Medtr4g114970
MergedOrthoGroup000021Sub032		Ct_CtTrNR01442,Ct_CtTrNR03223	Dg_DgTrNR05246	Mt_Medtr0004s0600,Mt_Medtr1g051215
MergedOrthoGroup000021Sub033		Ct_CtTrNR01482,Ct_CtTrNR14815	Dg_DgTrNR08367	Mt_Medtr2g009140
MergedOrthoGroup000021Sub034		Ct_CtTrNR01498	Dg_DgTrNR13478	Mt_Medtr3g088470
MergedOrthoGroup000021Sub035		Ct_CtTrNR01502	Dg_DgTrNR10328	Mt_Medtr1g102820,Mt_Medtr3g450200,Mt_Medtr5g090520
MergedOrthoGroup000021Sub036		Ct_CtTrNR01587	Dg_DgTrNR09776	Mt_Medtr2g083200
MergedOrthoGroup000021Sub037		Ct_CtTrNR01592	Dg_DgTrNR02246	Mt_Medtr4g104680
MergedOrthoGroup000021Sub038		Ct_CtTrNR01616	Dg_DgTrNR10540	Mt_Medtr4g087310
MergedOrthoGroup000021Sub039		Ct_CtTrNR01626	Dg_DgTrNR09536	Mt_Medtr3g099773,Mt_Medtr5g065550
MergedOrthoGroup000021Sub040		Ct_CtTrNR01631	Dg_DgTrNR06778	Mt_Medtr8g063150
MergedOrthoGroup000021Sub041		Ct_CtTrNR01660	Dg_DgTrNR06820	Mt_Medtr1g086870,Mt_Medtr7g109670
MergedOrthoGroup000021Sub042		Ct_CtTrNR01672	Dg_DgTrNR09090	Mt_Medtr7g085050
MergedOrthoGroup000021Sub043		Ct_CtTrNR01691	Dg_DgTrNR03450	Mt_Medtr2g082410
MergedOrthoGroup000021Sub044		Ct_CtTrNR01694	Dg_DgTrNR09303	Mt_Medtr1g105540
MergedOrthoGroup000021Sub045		Ct_CtTrNR01720	Dg_DgTrNR11243	Mt_Medtr3g462850,Mt_Medtr5g049280
MergedOrthoGroup000021Sub046		Ct_CtTrNR01736	Dg_DgTrNR08238	Mt_Medtr6g004730,Mt_Medtr6g004740,Mt_Medtr6g004750,Mt_Medtr6g004780,Mt_Medtr7g033625
MergedOrthoGroup000021Sub047		Ct_CtTrNR01770,Ct_CtTrNR12551,Ct_CtTrNR12552	Dg_DgTrNR05385	Mt_Medtr5g010300
MergedOrthoGroup000021Sub048		Ct_CtTrNR01816	Dg_DgTrNR06535	Mt_Medtr3g118070
MergedOrthoGroup000021Sub049		Ct_CtTrNR01820	Dg_DgTrNR05208	Mt_Medtr5g049260,Mt_Medtr5g049270
MergedOrthoGroup000021Sub050		Ct_CtTrNR01848	Dg_DgTrNR11655	Mt_Medtr6g004480
MergedOrthoGroup000021Sub051		Ct_CtTrNR01912	Dg_DgTrNR13001,Dg_DgTrNR13002	Mt_Medtr2g039450,Mt_Medtr2g039480,Mt_Medtr2g039510,Mt_Medtr2g039550,Mt_Medtr2g039570,Mt_Medtr4g124530,Mt_Medtr4g126050,Mt_Medtr4g126120
MergedOrthoGroup000021Sub052		Ct_CtTrNR01968	Dg_DgTrNR02953,Dg_DgTrNR11326	Mt_Medtr4g081550
MergedOrthoGroup000021Sub053		Ct_CtTrNR02011,Ct_CtTrNR05329	Dg_DgTrNR08233	Mt_Medtr5g008240,Mt_Medtr7g087200
MergedOrthoGroup000021Sub054		Ct_CtTrNR02051,Ct_CtTrNR12265	Dg_DgTrNR04395	Mt_Medtr1g048160,Mt_Medtr7g114100,Mt_Medtr7g114130
MergedOrthoGroup000021Sub055		Ct_CtTrNR02052	Dg_DgTrNR10603	Mt_Medtr1g099570
MergedOrthoGroup000021Sub056		Ct_CtTrNR02056	Dg_DgTrNR08030	Mt_Medtr5g042530
MergedOrthoGroup000021Sub057		Ct_CtTrNR02099	Dg_DgTrNR03718,Dg_DgTrNR03719	Mt_Medtr4g087620
MergedOrthoGroup000021Sub058		Ct_CtTrNR02123	Dg_DgTrNR14939	Mt_Medtr1g116875
MergedOrthoGroup000021Sub059		Ct_CtTrNR02142	Dg_DgTrNR01844	Mt_Medtr7g088540
MergedOrthoGroup000021Sub060		Ct_CtTrNR02157	Dg_DgTrNR07225	Mt_Medtr3g061160
MergedOrthoGroup000021Sub061		Ct_CtTrNR02245	Dg_DgTrNR13608	Mt_Medtr2g069490
MergedOrthoGroup000021Sub062		Ct_CtTrNR02267	Dg_DgTrNR01715	Mt_Medtr5g097230
MergedOrthoGroup000021Sub063		Ct_CtTrNR02397	Dg_DgTrNR10316	Mt_Medtr1g107255
MergedOrthoGroup000021Sub064		Ct_CtTrNR02435	Dg_DgTrNR07540	Mt_Medtr1g077740
MergedOrthoGroup000021Sub065		Ct_CtTrNR02441	Dg_DgTrNR04171	Mt_Medtr2g047908
MergedOrthoGroup000021Sub066		Ct_CtTrNR02445	Dg_DgTrNR08337	Mt_Medtr1g036350,Mt_Medtr7g018610
MergedOrthoGroup000021Sub067		Ct_CtTrNR02459	Dg_DgTrNR05613,Dg_DgTrNR09285	Mt_Medtr5g034470,Mt_Medtr8g063940
MergedOrthoGroup000021Sub068		Ct_CtTrNR02468	Dg_DgTrNR10972	Mt_Medtr1g079767
MergedOrthoGroup000021Sub069		Ct_CtTrNR02469,Ct_CtTrNR11100,Ct_CtTrNR13526	Dg_DgTrNR13190	Mt_Medtr6g022550,Mt_Medtr6g022570,Mt_Medtr6g022580,Mt_Medtr6g022610,Mt_Medtr7g100040,Mt_Medtr8g010330
MergedOrthoGroup000021Sub070		Ct_CtTrNR02482	Dg_DgTrNR05242	Mt_Medtr4g011300
MergedOrthoGroup000021Sub071		Ct_CtTrNR02485	Dg_DgTrNR00066	Mt_Medtr0148s0050
MergedOrthoGroup000021Sub072		Ct_CtTrNR02501	Dg_DgTrNR06052	Mt_Medtr6g053290,Mt_Medtr6g060735,Mt_Medtr6g060740
MergedOrthoGroup000021Sub073		Ct_CtTrNR02538	Dg_DgTrNR09473	Mt_Medtr4g124380,Mt_Medtr4g124390
MergedOrthoGroup000021Sub074		Ct_CtTrNR02558	Dg_DgTrNR09894	Mt_Medtr7g114310
MergedOrthoGroup000021Sub075		Ct_CtTrNR02571	Dg_DgTrNR03564	Mt_Medtr3g023830
MergedOrthoGroup000021Sub076		Ct_CtTrNR02669	Dg_DgTrNR09504	Mt_Medtr4g097440,Mt_Medtr5g015090
MergedOrthoGroup000021Sub077		Ct_CtTrNR02720	Dg_DgTrNR07579	Mt_Medtr4g015590
MergedOrthoGroup000021Sub078		Ct_CtTrNR02739	Dg_DgTrNR03508	Mt_Medtr3g054360,Mt_Medtr3g054370,Mt_Medtr5g093980
MergedOrthoGroup000021Sub079		Ct_CtTrNR02764	Dg_DgTrNR13489	Mt_Medtr1g116110
MergedOrthoGroup000021Sub080		Ct_CtTrNR02783,Ct_CtTrNR04718	Dg_DgTrNR05062	Mt_Medtr1g103240,Mt_Medtr3g106570,Mt_Medtr4g032370
MergedOrthoGroup000021Sub081		Ct_CtTrNR02803	Dg_DgTrNR01171	Mt_Medtr7g112650
MergedOrthoGroup000021Sub082		Ct_CtTrNR02876	Dg_DgTrNR10823	Mt_Medtr4g083380
MergedOrthoGroup000021Sub083		Ct_CtTrNR02913	Dg_DgTrNR02475	Mt_Medtr5g017080
MergedOrthoGroup000021Sub084		Ct_CtTrNR02943	Dg_DgTrNR04894	Mt_Medtr1g050518,Mt_Medtr3g091640
MergedOrthoGroup000021Sub085		Ct_CtTrNR02960	Dg_DgTrNR12623,Dg_DgTrNR15411	Mt_Medtr5g091980,Mt_Medtr7g090300,Mt_Medtr7g490330,Mt_Medtr7g490350
MergedOrthoGroup000021Sub086		Ct_CtTrNR02972	Dg_DgTrNR02649	Mt_Medtr5g084030
MergedOrthoGroup000021Sub087		Ct_CtTrNR02984	Dg_DgTrNR04966	Mt_Medtr2g047855,Mt_Medtr2g090290,Mt_Medtr8g465890
MergedOrthoGroup000021Sub088		Ct_CtTrNR03088	Dg_DgTrNR13950	Mt_Medtr8g062720
MergedOrthoGroup000021Sub089		Ct_CtTrNR03098	Dg_DgTrNR00973	Mt_Medtr3g093620
MergedOrthoGroup000021Sub090		Ct_CtTrNR03117	Dg_DgTrNR02656,Dg_DgTrNR08463	Mt_Medtr3g086210
MergedOrthoGroup000021Sub091		Ct_CtTrNR03144	Dg_DgTrNR00128	Mt_Medtr3g436080
MergedOrthoGroup000021Sub092		Ct_CtTrNR03147	Dg_DgTrNR07238	Mt_Medtr4g109090
MergedOrthoGroup000021Sub093		Ct_CtTrNR03188	Dg_DgTrNR01347	Mt_Medtr2g015010
MergedOrthoGroup000021Sub094		Ct_CtTrNR03228	Dg_DgTrNR15082	Mt_Medtr1g087310,Mt_Medtr3g040520,Mt_Medtr3g040810,Mt_Medtr4g076670,Mt_Medtr5g091975,Mt_Medtr8g026870
MergedOrthoGroup000021Sub095		Ct_CtTrNR03270	Dg_DgTrNR09749	Mt_Medtr3g114970,Mt_Medtr3g114990
MergedOrthoGroup000021Sub096		Ct_CtTrNR03278	Dg_DgTrNR12767	Mt_Medtr5g028850,Mt_Medtr8g070820
MergedOrthoGroup000021Sub097		Ct_CtTrNR03313,Ct_CtTrNR07391,Ct_CtTrNR11384,Ct_CtTrNR11878,Ct_CtTrNR14194,Ct_CtTrNR14195	Dg_DgTrNR00468	Mt_Medtr1g082470,Mt_Medtr1g083370,Mt_Medtr3g099777,Mt_Medtr5g066710,Mt_Medtr8g036730
MergedOrthoGroup000021Sub098		Ct_CtTrNR03374	Dg_DgTrNR04891	Mt_Medtr5g023980,Mt_Medtr8g073560,Mt_Medtr8g073700
MergedOrthoGroup000021Sub099		Ct_CtTrNR03397	Dg_DgTrNR01861	Mt_Medtr1g108290,Mt_Medtr4g127330
MergedOrthoGroup000021Sub100		Ct_CtTrNR03461	Dg_DgTrNR02430	Mt_Medtr3g061450
MergedOrthoGroup000021Sub101		Ct_CtTrNR03484	Dg_DgTrNR01894	Mt_Medtr2g069500
MergedOrthoGroup000021Sub102		Ct_CtTrNR03496,Ct_CtTrNR14236	Dg_DgTrNR13856	Mt_Medtr2g033040,Mt_Medtr2g033055,Mt_Medtr2g033080
MergedOrthoGroup000021Sub103		Ct_CtTrNR03574	Dg_DgTrNR00455	Mt_Medtr7g057760
MergedOrthoGroup000021Sub104		Ct_CtTrNR03579	Dg_DgTrNR07842	Mt_Medtr5g093990
MergedOrthoGroup000021Sub105		Ct_CtTrNR03584	Dg_DgTrNR13038	Mt_Medtr7g098900
MergedOrthoGroup000021Sub106		Ct_CtTrNR03643	Dg_DgTrNR09976	Mt_Medtr5g026880
MergedOrthoGroup000021Sub107		Ct_CtTrNR03655	Dg_DgTrNR03170	Mt_Medtr4g053370
MergedOrthoGroup000021Sub108		Ct_CtTrNR03657,Ct_CtTrNR08475	Dg_DgTrNR12611,Dg_DgTrNR14748,Dg_DgTrNR14751	Mt_Medtr6g039840,Mt_Medtr6g470960,Mt_Medtr8g107470
MergedOrthoGroup000021Sub109		Ct_CtTrNR03666	Dg_DgTrNR08375	Mt_Medtr4g104360
MergedOrthoGroup000021Sub110		Ct_CtTrNR03688	Dg_DgTrNR05639,Dg_DgTrNR05640	Mt_Medtr5g093890,Mt_Medtr8g093860
MergedOrthoGroup000021Sub111		Ct_CtTrNR03911	Dg_DgTrNR06409	Mt_Medtr3g074490
MergedOrthoGroup000021Sub112		Ct_CtTrNR04030	Dg_DgTrNR13725	Mt_Medtr3g465790
MergedOrthoGroup000021Sub113		Ct_CtTrNR04110	Dg_DgTrNR01032	Mt_Medtr4g023760
MergedOrthoGroup000021Sub114		Ct_CtTrNR04142	Dg_DgTrNR08488	Mt_Medtr8g006430
MergedOrthoGroup000021Sub115		Ct_CtTrNR04175	Dg_DgTrNR03484	Mt_Medtr8g074970
MergedOrthoGroup000021Sub116		Ct_CtTrNR04184	Dg_DgTrNR01903	Mt_Medtr1g090867
MergedOrthoGroup000021Sub117		Ct_CtTrNR04194	Dg_DgTrNR14471	Mt_Medtr2g076680
MergedOrthoGroup000021Sub118		Ct_CtTrNR04210	Dg_DgTrNR02380	Mt_Medtr3g086220
MergedOrthoGroup000021Sub119		Ct_CtTrNR04243,Ct_CtTrNR09836	Dg_DgTrNR06383	Mt_Medtr4g094908,Mt_Medtr5g016610
MergedOrthoGroup000021Sub120		Ct_CtTrNR04268	Dg_DgTrNR10208	Mt_Medtr2g098250,Mt_Medtr4g065850
MergedOrthoGroup000021Sub121		Ct_CtTrNR04288,Ct_CtTrNR13812	Dg_DgTrNR09593,Dg_DgTrNR11260,Dg_DgTrNR13893	Mt_Medtr3g099650,Mt_Medtr5g064980,Mt_Medtr5g064990
MergedOrthoGroup000021Sub122		Ct_CtTrNR04321	Dg_DgTrNR04043	Mt_Medtr2g090335
MergedOrthoGroup000021Sub123		Ct_CtTrNR04373	Dg_DgTrNR04220	Mt_Medtr4g096660
MergedOrthoGroup000021Sub124		Ct_CtTrNR04378	Dg_DgTrNR07085	Mt_Medtr4g094782
MergedOrthoGroup000021Sub125		Ct_CtTrNR04440	Dg_DgTrNR14369	Mt_Medtr2g011730,Mt_Medtr4g091240
MergedOrthoGroup000021Sub126		Ct_CtTrNR04456	Dg_DgTrNR06938	Mt_Medtr8g073110
MergedOrthoGroup000021Sub127		Ct_CtTrNR04541	Dg_DgTrNR11964	Mt_Medtr4g014680,Mt_Medtr7g069700
MergedOrthoGroup000021Sub128		Ct_CtTrNR04580	Dg_DgTrNR01957	Mt_Medtr2g007650
MergedOrthoGroup000021Sub129		Ct_CtTrNR04584	Dg_DgTrNR13225	Mt_Medtr2g090285
MergedOrthoGroup000021Sub130		Ct_CtTrNR04598	Dg_DgTrNR14946	Mt_Medtr4g073620
MergedOrthoGroup000021Sub131		Ct_CtTrNR04632,Ct_CtTrNR09140	Dg_DgTrNR04769,Dg_DgTrNR09778	Mt_Medtr4g101780,Mt_Medtr5g011950,Mt_Medtr5g011960,Mt_Medtr5g011980
MergedOrthoGroup000021Sub132		Ct_CtTrNR04697	Dg_DgTrNR14261	Mt_Medtr1g082920,Mt_Medtr6g029240,Mt_Medtr7g113520
MergedOrthoGroup000021Sub133		Ct_CtTrNR04769,Ct_CtTrNR13326	Dg_DgTrNR07883	Mt_Medtr2g006880
MergedOrthoGroup000021Sub134		Ct_CtTrNR04773	Dg_DgTrNR04570	Mt_Medtr4g131200,Mt_Medtr4g131205,Mt_Medtr4g131220,Mt_Medtr4g131270
MergedOrthoGroup000021Sub135		Ct_CtTrNR04777	Dg_DgTrNR07764	Mt_Medtr5g058150,Mt_Medtr6g075250
MergedOrthoGroup000021Sub136		Ct_CtTrNR04797	Dg_DgTrNR07470	Mt_Medtr2g090120,Mt_Medtr4g046113
MergedOrthoGroup000021Sub137		Ct_CtTrNR04808	Dg_DgTrNR06077	Mt_Medtr2g012380,Mt_Medtr2g012390,Mt_Medtr2g012420,Mt_Medtr4g050710,Mt_Medtr4g050760
MergedOrthoGroup000021Sub138		Ct_CtTrNR04815	Dg_DgTrNR02831	Mt_Medtr4g005360,Mt_Medtr4g005380
MergedOrthoGroup000021Sub139		Ct_CtTrNR04871	Dg_DgTrNR12443,Dg_DgTrNR12444	Mt_Medtr4g103790
MergedOrthoGroup000021Sub140		Ct_CtTrNR04946	Dg_DgTrNR09744	Mt_Medtr3g054010
MergedOrthoGroup000021Sub141		Ct_CtTrNR05008	Dg_DgTrNR12299	Mt_Medtr3g111330
MergedOrthoGroup000021Sub142		Ct_CtTrNR05068	Dg_DgTrNR05774	Mt_Medtr0506s0040,Mt_Medtr1g050360
MergedOrthoGroup000021Sub143		Ct_CtTrNR05084	Dg_DgTrNR03542	Mt_Medtr4g071670,Mt_Medtr6g008840
MergedOrthoGroup000021Sub144		Ct_CtTrNR05136,Ct_CtTrNR07634	Dg_DgTrNR06958,Dg_DgTrNR10036	Mt_Medtr1g069450,Mt_Medtr5g020870,Mt_Medtr7g098690,Mt_Medtr8g077135
MergedOrthoGroup000021Sub145		Ct_CtTrNR05153	Dg_DgTrNR14666	Mt_Medtr1g079525
MergedOrthoGroup000021Sub146		Ct_CtTrNR05155	Dg_DgTrNR00895	Mt_Medtr7g105100
MergedOrthoGroup000021Sub147		Ct_CtTrNR05166	Dg_DgTrNR05528	Mt_Medtr7g076310
MergedOrthoGroup000021Sub148		Ct_CtTrNR05198	Dg_DgTrNR05431	Mt_Medtr2g086600
MergedOrthoGroup000021Sub149		Ct_CtTrNR05204	Dg_DgTrNR04305	Mt_Medtr4g123670,Mt_Medtr4g123690
MergedOrthoGroup000021Sub150		Ct_CtTrNR05218	Dg_DgTrNR02828	Mt_Medtr4g081130
MergedOrthoGroup000021Sub151		Ct_CtTrNR05246	Dg_DgTrNR01465	Mt_Medtr1g062090,Mt_Medtr4g060790
MergedOrthoGroup000021Sub152		Ct_CtTrNR05346	Dg_DgTrNR04060	Mt_Medtr3g030890,Mt_Medtr4g037515
MergedOrthoGroup000021Sub153		Ct_CtTrNR05366	Dg_DgTrNR05796	Mt_Medtr5g011490,Mt_Medtr8g022020
MergedOrthoGroup000021Sub154		Ct_CtTrNR05428	Dg_DgTrNR09040	Mt_Medtr8g461030
MergedOrthoGroup000021Sub155		Ct_CtTrNR05435	Dg_DgTrNR00077	Mt_Medtr1g110430
MergedOrthoGroup000021Sub156		Ct_CtTrNR05448	Dg_DgTrNR02583	Mt_Medtr3g075100
MergedOrthoGroup000021Sub157		Ct_CtTrNR05499,Ct_CtTrNR13310	Dg_DgTrNR03845	Mt_Medtr3g100390,Mt_Medtr5g066230,Mt_Medtr5g066240,Mt_Medtr5g066530
MergedOrthoGroup000021Sub158		Ct_CtTrNR05510	Dg_DgTrNR04280	Mt_Medtr2g079330
MergedOrthoGroup000021Sub159		Ct_CtTrNR05520	Dg_DgTrNR08395	Mt_Medtr7g096170
MergedOrthoGroup000021Sub160		Ct_CtTrNR05560	Dg_DgTrNR15131	Mt_Medtr8g095410
MergedOrthoGroup000021Sub161		Ct_CtTrNR05579	Dg_DgTrNR04506	Mt_Medtr1g048960
MergedOrthoGroup000021Sub162		Ct_CtTrNR05644	Dg_DgTrNR06929	Mt_Medtr5g087590
MergedOrthoGroup000021Sub163		Ct_CtTrNR05647	Dg_DgTrNR08001,Dg_DgTrNR08002	Mt_Medtr4g039430
MergedOrthoGroup000021Sub164		Ct_CtTrNR05648	Dg_DgTrNR06161,Dg_DgTrNR06162	Mt_Medtr1g064070,Mt_Medtr3g101470
MergedOrthoGroup000021Sub165		Ct_CtTrNR05694	Dg_DgTrNR15229	Mt_Medtr2g076200,Mt_Medtr2g076210
MergedOrthoGroup000021Sub166		Ct_CtTrNR05711	Dg_DgTrNR10821	Mt_Medtr3g104080,Mt_Medtr6g023370
MergedOrthoGroup000021Sub167		Ct_CtTrNR05810	Dg_DgTrNR07857	Mt_Medtr4g014610,Mt_Medtr4g014620
MergedOrthoGroup000021Sub168		Ct_CtTrNR05863	Dg_DgTrNR04269	Mt_Medtr7g071680
MergedOrthoGroup000021Sub169		Ct_CtTrNR05886	Dg_DgTrNR05241	Mt_Medtr2g027310,Mt_Medtr4g088960
MergedOrthoGroup000021Sub170		Ct_CtTrNR05897	Dg_DgTrNR12573	Mt_Medtr2g007010,Mt_Medtr3g023890,Mt_Medtr3g023900
MergedOrthoGroup000021Sub171		Ct_CtTrNR05928	Dg_DgTrNR05692	Mt_Medtr2g093100,Mt_Medtr3g064785,Mt_Medtr4g061180
MergedOrthoGroup000021Sub172		Ct_CtTrNR05976	Dg_DgTrNR04177	Mt_Medtr8g040190
MergedOrthoGroup000021Sub173		Ct_CtTrNR06010	Dg_DgTrNR03298	Mt_Medtr5g009530
MergedOrthoGroup000021Sub174		Ct_CtTrNR06085	Dg_DgTrNR06574	Mt_Medtr5g022050,Mt_Medtr5g023090
MergedOrthoGroup000021Sub175		Ct_CtTrNR06136	Dg_DgTrNR04156	Mt_Medtr1g110560
MergedOrthoGroup000021Sub176		Ct_CtTrNR06157	Dg_DgTrNR00718	Mt_Medtr1g012790
MergedOrthoGroup000021Sub177		Ct_CtTrNR06183	Dg_DgTrNR05452	Mt_Medtr8g085640
MergedOrthoGroup000021Sub178		Ct_CtTrNR06213	Dg_DgTrNR03778	Mt_Medtr4g022320,Mt_Medtr7g058430,Mt_Medtr7g058450
MergedOrthoGroup000021Sub179		Ct_CtTrNR06229	Dg_DgTrNR11023	Mt_Medtr5g011850
MergedOrthoGroup000021Sub180		Ct_CtTrNR06265,Ct_CtTrNR09666	Dg_DgTrNR13844	Mt_Medtr1g054855,Mt_Medtr1g087510,Mt_Medtr8g023820,Mt_Medtr8g066245
MergedOrthoGroup000021Sub181		Ct_CtTrNR06341	Dg_DgTrNR03675,Dg_DgTrNR08838,Dg_DgTrNR08839	Mt_Medtr4g092640,Mt_Medtr6g034955,Mt_Medtr6g035065
MergedOrthoGroup000021Sub182		Ct_CtTrNR06364	Dg_DgTrNR01526	Mt_Medtr6g004720,Mt_Medtr7g033640
MergedOrthoGroup000021Sub183		Ct_CtTrNR06456	Dg_DgTrNR02550	Mt_Medtr8g098665
MergedOrthoGroup000021Sub184		Ct_CtTrNR06462	Dg_DgTrNR06206	Mt_Medtr4g084020
MergedOrthoGroup000021Sub185		Ct_CtTrNR06548	Dg_DgTrNR08349,Dg_DgTrNR09260	Mt_Medtr3g078000,Mt_Medtr4g105770
MergedOrthoGroup000021Sub186		Ct_CtTrNR06549	Dg_DgTrNR00237,Dg_DgTrNR00238,Dg_DgTrNR00239	Mt_Medtr1g089865,Mt_Medtr7g094250
MergedOrthoGroup000021Sub187		Ct_CtTrNR06553	Dg_DgTrNR03967	Mt_Medtr1g021280,Mt_Medtr7g081705,Mt_Medtr8g006850
MergedOrthoGroup000021Sub188		Ct_CtTrNR06563	Dg_DgTrNR09701,Dg_DgTrNR13776	Mt_Medtr0019s0070,Mt_Medtr1g101330
MergedOrthoGroup000021Sub189		Ct_CtTrNR06572	Dg_DgTrNR04190	Mt_Medtr7g115670
MergedOrthoGroup000021Sub190		Ct_CtTrNR06584	Dg_DgTrNR06666	Mt_Medtr4g094988
MergedOrthoGroup000021Sub191		Ct_CtTrNR06697	Dg_DgTrNR00425	Mt_Medtr3g006170,Mt_Medtr8g040560
MergedOrthoGroup000021Sub192		Ct_CtTrNR06714	Dg_DgTrNR08511	Mt_Medtr2g086950
MergedOrthoGroup000021Sub193		Ct_CtTrNR06795	Dg_DgTrNR10802	Mt_Medtr1g109580
MergedOrthoGroup000021Sub194		Ct_CtTrNR06805	Dg_DgTrNR15065	Mt_Medtr0057s0080,Mt_Medtr0057s0130
MergedOrthoGroup000021Sub195		Ct_CtTrNR06918	Dg_DgTrNR04772	Mt_Medtr4g101620
MergedOrthoGroup000021Sub196		Ct_CtTrNR06926	Dg_DgTrNR02909	Mt_Medtr1g104820
MergedOrthoGroup000021Sub197		Ct_CtTrNR06948	Dg_DgTrNR05037	Mt_Medtr3g045180,Mt_Medtr5g088860
MergedOrthoGroup000021Sub198		Ct_CtTrNR07106	Dg_DgTrNR12112	Mt_Medtr8g020940,Mt_Medtr8g020950,Mt_Medtr8g020960
MergedOrthoGroup000021Sub199		Ct_CtTrNR07207	Dg_DgTrNR04475	Mt_Medtr5g079870
MergedOrthoGroup000021Sub200		Ct_CtTrNR07223	Dg_DgTrNR02185	Mt_Medtr1g087790,Mt_Medtr7g108090
MergedOrthoGroup000021Sub201		Ct_CtTrNR07254	Dg_DgTrNR09596	Mt_Medtr1g021520
MergedOrthoGroup000021Sub202		Ct_CtTrNR07269	Dg_DgTrNR04630	Mt_Medtr2g102435,Mt_Medtr4g011890
MergedOrthoGroup000021Sub203		Ct_CtTrNR07314	Dg_DgTrNR01381	Mt_Medtr4g089040,Mt_Medtr4g089060
MergedOrthoGroup000021Sub204		Ct_CtTrNR07335	Dg_DgTrNR00688	Mt_Medtr2g039260,Mt_Medtr2g436300,Mt_Medtr4g120130
MergedOrthoGroup000021Sub205		Ct_CtTrNR07340,Ct_CtTrNR14558	Dg_DgTrNR12683	Mt_Medtr7g072330
MergedOrthoGroup000021Sub206		Ct_CtTrNR07402	Dg_DgTrNR02070	Mt_Medtr0004s0480
MergedOrthoGroup000021Sub207		Ct_CtTrNR07428	Dg_DgTrNR12196	Mt_Medtr8g077840
MergedOrthoGroup000021Sub208		Ct_CtTrNR07548	Dg_DgTrNR08035	Mt_Medtr1g045750,Mt_Medtr1g045760,Mt_Medtr1g045770
MergedOrthoGroup000021Sub209		Ct_CtTrNR07550	Dg_DgTrNR01870	Mt_Medtr1g114200,Mt_Medtr5g023360
MergedOrthoGroup000021Sub210		Ct_CtTrNR07627	Dg_DgTrNR06176	Mt_Medtr1g059790,Mt_Medtr8g095460
MergedOrthoGroup000021Sub211		Ct_CtTrNR07633	Dg_DgTrNR10020	Mt_Medtr8g077125
MergedOrthoGroup000021Sub212		Ct_CtTrNR07674	Dg_DgTrNR07592	Mt_Medtr1g023760,Mt_Medtr1g023925,Mt_Medtr7g007170,Mt_Medtr8g466020
MergedOrthoGroup000021Sub213		Ct_CtTrNR07736	Dg_DgTrNR01979,Dg_DgTrNR01980	Mt_Medtr3g074620
MergedOrthoGroup000021Sub214		Ct_CtTrNR07746	Dg_DgTrNR09122	Mt_Medtr6g004130
MergedOrthoGroup000021Sub215		Ct_CtTrNR07767	Dg_DgTrNR13355	Mt_Medtr3g082180
MergedOrthoGroup000021Sub216		Ct_CtTrNR07801	Dg_DgTrNR05954	Mt_Medtr1g007840,Mt_Medtr3g091770
MergedOrthoGroup000021Sub217		Ct_CtTrNR07822	Dg_DgTrNR10072	Mt_Medtr6g069850
MergedOrthoGroup000021Sub218		Ct_CtTrNR07853,Ct_CtTrNR07854	Dg_DgTrNR12657	Mt_Medtr7g082530
MergedOrthoGroup000021Sub219		Ct_CtTrNR07858,Ct_CtTrNR12731	Dg_DgTrNR12822,Dg_DgTrNR12823	Mt_Medtr5g099240
MergedOrthoGroup000021Sub220		Ct_CtTrNR07884	Dg_DgTrNR03442	Mt_Medtr5g066400,Mt_Medtr8g007440,Mt_Medtr8g464900
MergedOrthoGroup000021Sub221		Ct_CtTrNR07902,Ct_CtTrNR07903	Dg_DgTrNR12658	Mt_Medtr7g013820
MergedOrthoGroup000021Sub222		Ct_CtTrNR07906	Dg_DgTrNR10276	Mt_Medtr8g099615
MergedOrthoGroup000021Sub223		Ct_CtTrNR08085	Dg_DgTrNR04256	Mt_Medtr1g116953,Mt_Medtr7g405780
MergedOrthoGroup000021Sub224		Ct_CtTrNR08144	Dg_DgTrNR06284	Mt_Medtr1g116565
MergedOrthoGroup000021Sub225		Ct_CtTrNR08197	Dg_DgTrNR01913,Dg_DgTrNR14136	Mt_Medtr3g117100,Mt_Medtr4g070730,Mt_Medtr4g070780,Mt_Medtr4g070790,Mt_Medtr4g070810
MergedOrthoGroup000021Sub226		Ct_CtTrNR08198	Dg_DgTrNR09350	Mt_Medtr8g085190
MergedOrthoGroup000021Sub227		Ct_CtTrNR08200	Dg_DgTrNR13859	Mt_Medtr4g077250
MergedOrthoGroup000021Sub228		Ct_CtTrNR08203	Dg_DgTrNR08760	Mt_Medtr2g088060,Mt_Medtr4g049540
MergedOrthoGroup000021Sub229		Ct_CtTrNR08223	Dg_DgTrNR07827	Mt_Medtr7g089800
MergedOrthoGroup000021Sub230		Ct_CtTrNR08228	Dg_DgTrNR04107	Mt_Medtr1g013440,Mt_Medtr3g113260
MergedOrthoGroup000021Sub231		Ct_CtTrNR08298	Dg_DgTrNR12235	Mt_Medtr1g115300
MergedOrthoGroup000021Sub232		Ct_CtTrNR08355	Dg_DgTrNR13770	Mt_Medtr7g077710,Mt_Medtr8g095630,Mt_Medtr8g095650
MergedOrthoGroup000021Sub233		Ct_CtTrNR08364	Dg_DgTrNR03048	Mt_Medtr4g068475
MergedOrthoGroup000021Sub234		Ct_CtTrNR08476	Dg_DgTrNR00649,Dg_DgTrNR03033	Mt_Medtr8g099105
MergedOrthoGroup000021Sub235		Ct_CtTrNR08496	Dg_DgTrNR14518	Mt_Medtr1g102550
MergedOrthoGroup000021Sub236		Ct_CtTrNR08502	Dg_DgTrNR14870	Mt_Medtr1g019120
MergedOrthoGroup000021Sub237		Ct_CtTrNR08543	Dg_DgTrNR06499	Mt_Medtr2g436660,Mt_Medtr4g119970
MergedOrthoGroup000021Sub238		Ct_CtTrNR08559	Dg_DgTrNR12735	Mt_Medtr4g115580
MergedOrthoGroup000021Sub239		Ct_CtTrNR08567	Dg_DgTrNR11974	Mt_Medtr8g028220,Mt_Medtr8g028250
MergedOrthoGroup000021Sub240		Ct_CtTrNR08649,Ct_CtTrNR11613	Dg_DgTrNR02751	Mt_Medtr1g484920,Mt_Medtr7g111540
MergedOrthoGroup000021Sub241		Ct_CtTrNR08669	Dg_DgTrNR08462	Mt_Medtr5g012060
MergedOrthoGroup000021Sub242		Ct_CtTrNR08738	Dg_DgTrNR08991	Mt_Medtr2g039340,Mt_Medtr2g039360,Mt_Medtr4g126160
MergedOrthoGroup000021Sub243		Ct_CtTrNR08766	Dg_DgTrNR13867	Mt_Medtr7g011820
MergedOrthoGroup000021Sub244		Ct_CtTrNR08778	Dg_DgTrNR09872	Mt_Medtr8g021380
MergedOrthoGroup000021Sub245		Ct_CtTrNR08847	Dg_DgTrNR06997	Mt_Medtr3g097290,Mt_Medtr4g087690,Mt_Medtr8g095320
MergedOrthoGroup000021Sub246		Ct_CtTrNR08858	Dg_DgTrNR11380	Mt_Medtr3g102470
MergedOrthoGroup000021Sub247		Ct_CtTrNR08885,Ct_CtTrNR10943	Dg_DgTrNR12664	Mt_Medtr2g098950,Mt_Medtr4g067310
MergedOrthoGroup000021Sub248		Ct_CtTrNR08923	Dg_DgTrNR11188	Mt_Medtr6g007887
MergedOrthoGroup000021Sub249		Ct_CtTrNR08924	Dg_DgTrNR06008,Dg_DgTrNR13971	Mt_Medtr3g106340
MergedOrthoGroup000021Sub250		Ct_CtTrNR08927	Dg_DgTrNR03379	Mt_Medtr2g009650,Mt_Medtr4g093650
MergedOrthoGroup000021Sub251		Ct_CtTrNR08934	Dg_DgTrNR00303	Mt_Medtr1g107520,Mt_Medtr3g113750,Mt_Medtr3g114210
MergedOrthoGroup000021Sub252		Ct_CtTrNR09000	Dg_DgTrNR06671,Dg_DgTrNR13241	Mt_Medtr0041s0140,Mt_Medtr1g063210,Mt_Medtr7g101930
MergedOrthoGroup000021Sub253		Ct_CtTrNR09053,Ct_CtTrNR11174	Dg_DgTrNR03705,Dg_DgTrNR03706	Mt_Medtr3g437740
MergedOrthoGroup000021Sub254		Ct_CtTrNR09056	Dg_DgTrNR12253,Dg_DgTrNR12254	Mt_Medtr1g097140,Mt_Medtr7g079470,Mt_Medtr7g111550
MergedOrthoGroup000021Sub255		Ct_CtTrNR09098	Dg_DgTrNR06094	Mt_Medtr2g008810,Mt_Medtr5g017190
MergedOrthoGroup000021Sub256		Ct_CtTrNR09103	Dg_DgTrNR14286	Mt_Medtr3g079310
MergedOrthoGroup000021Sub257		Ct_CtTrNR09117	Dg_DgTrNR00595	Mt_Medtr7g080320
MergedOrthoGroup000021Sub258		Ct_CtTrNR09166	Dg_DgTrNR03997	Mt_Medtr4g134510
MergedOrthoGroup000021Sub259		Ct_CtTrNR09175	Dg_DgTrNR01859	Mt_Medtr2g025790,Mt_Medtr2g025810,Mt_Medtr2g025830,Mt_Medtr2g025950,Mt_Medtr4g133120
MergedOrthoGroup000021Sub260		Ct_CtTrNR09184	Dg_DgTrNR11423	Mt_Medtr8g107410
MergedOrthoGroup000021Sub261		Ct_CtTrNR09189	Dg_DgTrNR13308	Mt_Medtr2g016140
MergedOrthoGroup000021Sub262		Ct_CtTrNR09241	Dg_DgTrNR00819,Dg_DgTrNR06490	Mt_Medtr3g075270,Mt_Medtr4g104140,Mt_Medtr4g104170
MergedOrthoGroup000021Sub263		Ct_CtTrNR09256	Dg_DgTrNR02212	Mt_Medtr1g018140,Mt_Medtr3g103170
MergedOrthoGroup000021Sub264		Ct_CtTrNR09257	Dg_DgTrNR12209	Mt_Medtr4g122920
MergedOrthoGroup000021Sub265		Ct_CtTrNR09346	Dg_DgTrNR07932	Mt_Medtr2g010740
MergedOrthoGroup000021Sub266		Ct_CtTrNR09365	Dg_DgTrNR01365	Mt_Medtr5g023110
MergedOrthoGroup000021Sub267		Ct_CtTrNR09411	Dg_DgTrNR13156	Mt_Medtr7g092260
MergedOrthoGroup000021Sub268		Ct_CtTrNR09427	Dg_DgTrNR04449	Mt_Medtr1g100727,Mt_Medtr6g054890
MergedOrthoGroup000021Sub269		Ct_CtTrNR09438	Dg_DgTrNR02716,Dg_DgTrNR04141,Dg_DgTrNR09134	Mt_Medtr1g009010,Mt_Medtr3g109300
MergedOrthoGroup000021Sub270		Ct_CtTrNR09491	Dg_DgTrNR13365	Mt_Medtr3g117080,Mt_Medtr4g070670,Mt_Medtr6g015630
MergedOrthoGroup000021Sub271		Ct_CtTrNR09493,Ct_CtTrNR14573	Dg_DgTrNR08274,Dg_DgTrNR10902	Mt_Medtr2g072790
MergedOrthoGroup000021Sub272		Ct_CtTrNR09548,Ct_CtTrNR14593	Dg_DgTrNR03653	Mt_Medtr3g024520,Mt_Medtr3g025230,Mt_Medtr3g025250,Mt_Medtr3g025260,Mt_Medtr4g109470
MergedOrthoGroup000021Sub273		Ct_CtTrNR09564	Dg_DgTrNR12802	Mt_Medtr3g075040
MergedOrthoGroup000021Sub274		Ct_CtTrNR09578	Dg_DgTrNR14741	Mt_Medtr3g092670
MergedOrthoGroup000021Sub275		Ct_CtTrNR09591	Dg_DgTrNR08671	Mt_Medtr3g033520
MergedOrthoGroup000021Sub276		Ct_CtTrNR09618	Dg_DgTrNR00798	Mt_Medtr7g117030
MergedOrthoGroup000021Sub277		Ct_CtTrNR09633	Dg_DgTrNR06709	Mt_Medtr0002s0890,Mt_Medtr1g094000,Mt_Medtr1g094010,Mt_Medtr7g060030
MergedOrthoGroup000021Sub278		Ct_CtTrNR09675	Dg_DgTrNR14117	Mt_Medtr4g008070,Mt_Medtr4g008090
MergedOrthoGroup000021Sub279		Ct_CtTrNR09757	Dg_DgTrNR06466	Mt_Medtr3g075410
MergedOrthoGroup000021Sub280		Ct_CtTrNR09761	Dg_DgTrNR01867	Mt_Medtr3g110160
MergedOrthoGroup000021Sub281		Ct_CtTrNR09883	Dg_DgTrNR06809	Mt_Medtr5g029600,Mt_Medtr8g066470
MergedOrthoGroup000021Sub282		Ct_CtTrNR09890	Dg_DgTrNR02780,Dg_DgTrNR02781	Mt_Medtr7g009740
MergedOrthoGroup000021Sub283		Ct_CtTrNR09913	Dg_DgTrNR02379	Mt_Medtr2g093240,Mt_Medtr2g093250,Mt_Medtr2g093260,Mt_Medtr4g461060
MergedOrthoGroup000021Sub284		Ct_CtTrNR09948	Dg_DgTrNR13110	Mt_Medtr3g069280,Mt_Medtr3g070720,Mt_Medtr5g082620,Mt_Medtr8g024400
MergedOrthoGroup000021Sub285		Ct_CtTrNR09981	Dg_DgTrNR06767	Mt_Medtr5g090740
MergedOrthoGroup000021Sub286		Ct_CtTrNR09984	Dg_DgTrNR15089	Mt_Medtr1g052110,Mt_Medtr7g092380
MergedOrthoGroup000021Sub287		Ct_CtTrNR10034	Dg_DgTrNR02331	Mt_Medtr4g127800
MergedOrthoGroup000021Sub288		Ct_CtTrNR10043	Dg_DgTrNR06898	Mt_Medtr7g079440
MergedOrthoGroup000021Sub289		Ct_CtTrNR10100	Dg_DgTrNR01028,Dg_DgTrNR10167,Dg_DgTrNR10903	Mt_Medtr5g078080
MergedOrthoGroup000021Sub290		Ct_CtTrNR10111,Ct_CtTrNR13278	Dg_DgTrNR11844	Mt_Medtr1g028910,Mt_Medtr1g028920,Mt_Medtr3g090350
MergedOrthoGroup000021Sub291		Ct_CtTrNR10125	Dg_DgTrNR05191	Mt_Medtr1g116500,Mt_Medtr7g033125
MergedOrthoGroup000021Sub292		Ct_CtTrNR10132	Dg_DgTrNR04010,Dg_DgTrNR12360	Mt_Medtr7g101730
MergedOrthoGroup000021Sub293		Ct_CtTrNR10154	Dg_DgTrNR05689	Mt_Medtr2g098330,Mt_Medtr6g061630
MergedOrthoGroup000021Sub294		Ct_CtTrNR10168,Ct_CtTrNR15198	Dg_DgTrNR12781	Mt_Medtr1g080950,Mt_Medtr7g115080
MergedOrthoGroup000021Sub295		Ct_CtTrNR10227	Dg_DgTrNR13546	Mt_Medtr7g096210
MergedOrthoGroup000021Sub296		Ct_CtTrNR10251	Dg_DgTrNR01085,Dg_DgTrNR14476	Mt_Medtr2g049420
MergedOrthoGroup000021Sub297		Ct_CtTrNR10269	Dg_DgTrNR01249	Mt_Medtr6g079040,Mt_Medtr7g089090
MergedOrthoGroup000021Sub298		Ct_CtTrNR10350	Dg_DgTrNR01927	Mt_Medtr1g037280
MergedOrthoGroup000021Sub299		Ct_CtTrNR10411	Dg_DgTrNR12943	Mt_Medtr4g095410,Mt_Medtr5g016070
MergedOrthoGroup000021Sub300		Ct_CtTrNR10482	Dg_DgTrNR01536	Mt_Medtr8g040180
MergedOrthoGroup000021Sub301		Ct_CtTrNR10609	Dg_DgTrNR08162	Mt_Medtr3g065490,Mt_Medtr3g118240,Mt_Medtr5g041970,Mt_Medtr5g084370
MergedOrthoGroup000021Sub302		Ct_CtTrNR10634	Dg_DgTrNR05812	Mt_Medtr8g077150
MergedOrthoGroup000021Sub303		Ct_CtTrNR10709,Ct_CtTrNR10710	Dg_DgTrNR05929	Mt_Medtr5g062660
MergedOrthoGroup000021Sub304		Ct_CtTrNR10749	Dg_DgTrNR06068	Mt_Medtr7g053260
MergedOrthoGroup000021Sub305		Ct_CtTrNR10835	Dg_DgTrNR11196	Mt_Medtr2g020870
MergedOrthoGroup000021Sub306		Ct_CtTrNR10908	Dg_DgTrNR05456	Mt_Medtr2g019620
MergedOrthoGroup000021Sub307		Ct_CtTrNR10923	Dg_DgTrNR13186	Mt_Medtr8g009680,Mt_Medtr8g009700
MergedOrthoGroup000021Sub308		Ct_CtTrNR10925	Dg_DgTrNR04904,Dg_DgTrNR04905	Mt_Medtr5g077180
MergedOrthoGroup000021Sub309		Ct_CtTrNR10942	Dg_DgTrNR11428	Mt_Medtr2g020830,Mt_Medtr4g118490
MergedOrthoGroup000021Sub310		Ct_CtTrNR10959	Dg_DgTrNR10182	Mt_Medtr5g020890
MergedOrthoGroup000021Sub311		Ct_CtTrNR10981	Dg_DgTrNR13911	Mt_Medtr4g109960
MergedOrthoGroup000021Sub312		Ct_CtTrNR11054	Dg_DgTrNR06988	Mt_Medtr4g115980
MergedOrthoGroup000021Sub313		Ct_CtTrNR11087	Dg_DgTrNR07286	Mt_Medtr1g063040,Mt_Medtr7g062520,Mt_Medtr7g114260
MergedOrthoGroup000021Sub314		Ct_CtTrNR11141,Ct_CtTrNR12351,Ct_CtTrNR12352	Dg_DgTrNR00602	Mt_Medtr4g070910,Mt_Medtr5g010260,Mt_Medtr5g010290
MergedOrthoGroup000021Sub315		Ct_CtTrNR11183	Dg_DgTrNR11525	Mt_Medtr2g009040
MergedOrthoGroup000021Sub316		Ct_CtTrNR11213	Dg_DgTrNR15027	Mt_Medtr5g037210,Mt_Medtr8g062150
MergedOrthoGroup000021Sub317		Ct_CtTrNR11282	Dg_DgTrNR02048	Mt_Medtr7g075870,Mt_Medtr8g033220,Mt_Medtr8g033250
MergedOrthoGroup000021Sub318		Ct_CtTrNR11319	Dg_DgTrNR14919	Mt_Medtr6g033000,Mt_Medtr7g085090
MergedOrthoGroup000021Sub319		Ct_CtTrNR11399	Dg_DgTrNR02616	Mt_Medtr2g036060
MergedOrthoGroup000021Sub320		Ct_CtTrNR11431	Dg_DgTrNR15304	Mt_Medtr3g105400
MergedOrthoGroup000021Sub321		Ct_CtTrNR11479	Dg_DgTrNR00449	Mt_Medtr3g037230
MergedOrthoGroup000021Sub322		Ct_CtTrNR11499	Dg_DgTrNR00236	Mt_Medtr3g078570
MergedOrthoGroup000021Sub323		Ct_CtTrNR11538	Dg_DgTrNR01100,Dg_DgTrNR01101,Dg_DgTrNR01102,Dg_DgTrNR07374	Mt_Medtr1g078040,Mt_Medtr1g078050
MergedOrthoGroup000021Sub324		Ct_CtTrNR11572	Dg_DgTrNR00383	Mt_Medtr6g004240,Mt_Medtr7g082650
MergedOrthoGroup000021Sub325		Ct_CtTrNR11576	Dg_DgTrNR08741	Mt_Medtr6g085190
MergedOrthoGroup000021Sub326		Ct_CtTrNR11794	Dg_DgTrNR13444	Mt_Medtr3g041730,Mt_Medtr5g004770
MergedOrthoGroup000021Sub327		Ct_CtTrNR11811	Dg_DgTrNR10856	Mt_Medtr1g012850,Mt_Medtr3g106550
MergedOrthoGroup000021Sub328		Ct_CtTrNR11829	Dg_DgTrNR12003	Mt_Medtr1g109200
MergedOrthoGroup000021Sub329		Ct_CtTrNR11894	Dg_DgTrNR07643	Mt_Medtr8g087820
MergedOrthoGroup000021Sub330		Ct_CtTrNR11917,Ct_CtTrNR11918	Dg_DgTrNR05453,Dg_DgTrNR08626	Mt_Medtr0336s0070,Mt_Medtr4g123600
MergedOrthoGroup000021Sub331		Ct_CtTrNR11939	Dg_DgTrNR14723	Mt_Medtr3g045010,Mt_Medtr5g086790,Mt_Medtr5g086940,Mt_Medtr5g086960,Mt_Medtr5g086970,Mt_Medtr5g087050,Mt_Medtr5g087240,Mt_Medtr5g087250
MergedOrthoGroup000021Sub332		Ct_CtTrNR11958	Dg_DgTrNR04676	Mt_Medtr1g078200
MergedOrthoGroup000021Sub333		Ct_CtTrNR11992	Dg_DgTrNR04458	Mt_Medtr1g104810
MergedOrthoGroup000021Sub334		Ct_CtTrNR12017	Dg_DgTrNR10908	Mt_Medtr4g099010
MergedOrthoGroup000021Sub335		Ct_CtTrNR12141	Dg_DgTrNR14564	Mt_Medtr7g096350
MergedOrthoGroup000021Sub336		Ct_CtTrNR12154	Dg_DgTrNR10139,Dg_DgTrNR12078	Mt_Medtr2g437910
MergedOrthoGroup000021Sub337		Ct_CtTrNR12214	Dg_DgTrNR09779	Mt_Medtr1g062190
MergedOrthoGroup000021Sub338		Ct_CtTrNR12238	Dg_DgTrNR12285	Mt_Medtr3g099590
MergedOrthoGroup000021Sub339		Ct_CtTrNR12252	Dg_DgTrNR00576	Mt_Medtr2g036740,Mt_Medtr4g127680
MergedOrthoGroup000021Sub340		Ct_CtTrNR12348	Dg_DgTrNR05090	Mt_Medtr2g086780
MergedOrthoGroup000021Sub341		Ct_CtTrNR12354	Dg_DgTrNR05606	Mt_Medtr7g117495
MergedOrthoGroup000021Sub342		Ct_CtTrNR12440	Dg_DgTrNR03853	Mt_Medtr4g084320
MergedOrthoGroup000021Sub343		Ct_CtTrNR12505	Dg_DgTrNR09232,Dg_DgTrNR15156	Mt_Medtr1g019430,Mt_Medtr1g019440,Mt_Medtr1g019460
MergedOrthoGroup000021Sub344		Ct_CtTrNR12520	Dg_DgTrNR02293	Mt_Medtr4g088885
MergedOrthoGroup000021Sub345		Ct_CtTrNR12554	Dg_DgTrNR12811	Mt_Medtr4g035100
MergedOrthoGroup000021Sub346		Ct_CtTrNR12576	Dg_DgTrNR03253,Dg_DgTrNR04091,Dg_DgTrNR04721	Mt_Medtr4g117990,Mt_Medtr7g081190
MergedOrthoGroup000021Sub347		Ct_CtTrNR12601	Dg_DgTrNR02326	Mt_Medtr1g050520,Mt_Medtr5g065180
MergedOrthoGroup000021Sub348		Ct_CtTrNR12612	Dg_DgTrNR15261	Mt_Medtr6g073003
MergedOrthoGroup000021Sub349		Ct_CtTrNR12699	Dg_DgTrNR14055	Mt_Medtr5g039800,Mt_Medtr6g027720,Mt_Medtr7g086420
MergedOrthoGroup000021Sub350		Ct_CtTrNR12711	Dg_DgTrNR12858	Mt_Medtr8g056100
MergedOrthoGroup000021Sub351		Ct_CtTrNR12721	Dg_DgTrNR06984	Mt_Medtr5g049230,Mt_Medtr5g049240,Mt_Medtr8g069850
MergedOrthoGroup000021Sub352		Ct_CtTrNR12729	Dg_DgTrNR12878,Dg_DgTrNR12879	Mt_Medtr3g071620
MergedOrthoGroup000021Sub353		Ct_CtTrNR12741	Dg_DgTrNR09547	Mt_Medtr3g067685,Mt_Medtr5g079550
MergedOrthoGroup000021Sub354		Ct_CtTrNR12743	Dg_DgTrNR01003	Mt_Medtr8g099650
MergedOrthoGroup000021Sub355		Ct_CtTrNR12815	Dg_DgTrNR05027	Mt_Medtr5g017630
MergedOrthoGroup000021Sub356		Ct_CtTrNR12923	Dg_DgTrNR07206	Mt_Medtr7g113850
MergedOrthoGroup000021Sub357		Ct_CtTrNR12967,Ct_CtTrNR12968	Dg_DgTrNR06051	Mt_Medtr8g090105
MergedOrthoGroup000021Sub358		Ct_CtTrNR12999	Dg_DgTrNR03749	Mt_Medtr4g006220,Mt_Medtr4g006310,Mt_Medtr4g011870,Mt_Medtr8g070760
MergedOrthoGroup000021Sub359		Ct_CtTrNR13044	Dg_DgTrNR03747	Mt_Medtr5g079770
MergedOrthoGroup000021Sub360		Ct_CtTrNR13064,Ct_CtTrNR13065	Dg_DgTrNR01446	Mt_Medtr2g019630
MergedOrthoGroup000021Sub361		Ct_CtTrNR13073	Dg_DgTrNR04684	Mt_Medtr1g102710
MergedOrthoGroup000021Sub362		Ct_CtTrNR13202	Dg_DgTrNR04837,Dg_DgTrNR04838	Mt_Medtr4g098530
MergedOrthoGroup000021Sub363		Ct_CtTrNR13214	Dg_DgTrNR01260	Mt_Medtr4g068740
MergedOrthoGroup000021Sub364		Ct_CtTrNR13238	Dg_DgTrNR01036	Mt_Medtr7g022400,Mt_Medtr7g112750
MergedOrthoGroup000021Sub365		Ct_CtTrNR13273,Ct_CtTrNR13274,Ct_CtTrNR13578,Ct_CtTrNR13579	Dg_DgTrNR03931	Mt_Medtr2g048610,Mt_Medtr2g063837,Mt_Medtr2g063873,Mt_Medtr2g063913,Mt_Medtr2g063930,Mt_Medtr2g064110,Mt_Medtr4g121140,Mt_Medtr6g092010
MergedOrthoGroup000021Sub366		Ct_CtTrNR13290	Dg_DgTrNR04811	Mt_Medtr4g017150,Mt_Medtr5g046460,Mt_Medtr5g046560,Mt_Medtr6g049240
MergedOrthoGroup000021Sub367		Ct_CtTrNR13293	Dg_DgTrNR02092	Mt_Medtr3g100890
MergedOrthoGroup000021Sub368		Ct_CtTrNR13295	Dg_DgTrNR13247	Mt_Medtr5g022700
MergedOrthoGroup000021Sub369		Ct_CtTrNR13311	Dg_DgTrNR10718	Mt_Medtr2g023880,Mt_Medtr4g132400
MergedOrthoGroup000021Sub370		Ct_CtTrNR13339	Dg_DgTrNR06967	Mt_Medtr8g009780
MergedOrthoGroup000021Sub371		Ct_CtTrNR13374	Dg_DgTrNR03105	Mt_Medtr0022s0280,Mt_Medtr2g076330
MergedOrthoGroup000021Sub372		Ct_CtTrNR13380	Dg_DgTrNR13424	Mt_Medtr4g128650
MergedOrthoGroup000021Sub373		Ct_CtTrNR13386,Ct_CtTrNR14485	Dg_DgTrNR12103	Mt_Medtr2g086200
MergedOrthoGroup000021Sub374		Ct_CtTrNR13442	Dg_DgTrNR13711	Mt_Medtr1g098000,Mt_Medtr1g098030,Mt_Medtr1g098370
MergedOrthoGroup000021Sub375		Ct_CtTrNR13498	Dg_DgTrNR01567	Mt_Medtr0262s0030,Mt_Medtr4g119190,Mt_Medtr5g031400,Mt_Medtr7g092500
MergedOrthoGroup000021Sub376		Ct_CtTrNR13566,Ct_CtTrNR13567,Ct_CtTrNR13568	Dg_DgTrNR14585	Mt_Medtr8g055880
MergedOrthoGroup000021Sub377		Ct_CtTrNR13593	Dg_DgTrNR08108	Mt_Medtr3g005510
MergedOrthoGroup000021Sub378		Ct_CtTrNR13677	Dg_DgTrNR00376	Mt_Medtr3g069080
MergedOrthoGroup000021Sub379		Ct_CtTrNR13920	Dg_DgTrNR11571	Mt_Medtr2g082090
MergedOrthoGroup000021Sub380		Ct_CtTrNR13936	Dg_DgTrNR05494	Mt_Medtr1g052505,Mt_Medtr3g031590,Mt_Medtr4g037670
MergedOrthoGroup000021Sub381		Ct_CtTrNR13940	Dg_DgTrNR09380	Mt_Medtr1g053160
MergedOrthoGroup000021Sub382		Ct_CtTrNR13952	Dg_DgTrNR07944	Mt_Medtr4g068010,Mt_Medtr5g027240,Mt_Medtr5g027290
MergedOrthoGroup000021Sub383		Ct_CtTrNR14099	Dg_DgTrNR01766,Dg_DgTrNR12067,Dg_DgTrNR15330	Mt_Medtr3g100060
MergedOrthoGroup000021Sub384		Ct_CtTrNR14424	Dg_DgTrNR08216	Mt_Medtr5g089000
MergedOrthoGroup000021Sub385		Ct_CtTrNR14604	Dg_DgTrNR14941	Mt_Medtr5g026610
MergedOrthoGroup000021Sub386		Ct_CtTrNR14858	Dg_DgTrNR02108	Mt_Medtr2g069340
MergedOrthoGroup000021Sub387		Ct_CtTrNR14934	Dg_DgTrNR12716	Mt_Medtr5g099280
MergedOrthoGroup000021Sub388		Ct_CtTrNR15210	Dg_DgTrNR02715	Mt_Medtr1g098360
MergedOrthoGroup000030Sub001		Ct_CtTrNR00162	Dg_DgTrNR09482	Mt_Medtr6g007160,Mt_Medtr7g034390
MergedOrthoGroup000031		Ct_CtTrNR00036	Dg_DgTrNR02111	Mt_Medtr3g462760,Mt_Medtr5g069680
MergedOrthoGroup000034		Ct_CtTrNR00039	Dg_DgTrNR01053,Dg_DgTrNR14067	Mt_Medtr7g117170,Mt_Medtr8g027870,Mt_Medtr8g027885
MergedOrthoGroup000036		Ct_CtTrNR00041	Dg_DgTrNR03464,Dg_DgTrNR12028	Mt_Medtr5g032070,Mt_Medtr8g471140
MergedOrthoGroup000037		Ct_CtTrNR00042	Dg_DgTrNR02829	Mt_Medtr5g030020
MergedOrthoGroup000042		Ct_CtTrNR00047	Dg_DgTrNR03394	Mt_Medtr4g007090,Mt_Medtr4g007095
MergedOrthoGroup000045Sub001		Ct_CtTrNR15187	Dg_DgTrNR11841	Mt_Medtr2g014400,Mt_Medtr4g088385
MergedOrthoGroup000046		Ct_CtTrNR00051	Dg_DgTrNR04100	Mt_Medtr8g077440
MergedOrthoGroup000052		Ct_CtTrNR00057	Dg_DgTrNR13522,Dg_DgTrNR13523	Mt_Medtr3g087490,Mt_Medtr3g087510,Mt_Medtr8g090315
MergedOrthoGroup000055Sub001		Ct_CtTrNR00060,Ct_CtTrNR08274,Ct_CtTrNR08276,Ct_CtTrNR08277,Ct_CtTrNR09521	Dg_DgTrNR14898	Mt_Medtr7g104290,Mt_Medtr7g104300
MergedOrthoGroup000055Sub002		Ct_CtTrNR00680	Dg_DgTrNR09191,Dg_DgTrNR11611	Mt_Medtr4g122260
MergedOrthoGroup000055Sub003		Ct_CtTrNR08165	Dg_DgTrNR12217	Mt_Medtr7g006080
MergedOrthoGroup000057		Ct_CtTrNR00062	Dg_DgTrNR09460	Mt_Medtr1g088775,Mt_Medtr7g075090,Mt_Medtr8g036020,Mt_Medtr8g036035,Mt_Medtr8g036040,Mt_Medtr8g036050
MergedOrthoGroup000058		Ct_CtTrNR00064	Dg_DgTrNR13426	Mt_Medtr2g093500,Mt_Medtr2g101880
MergedOrthoGroup000059		Ct_CtTrNR00065	Dg_DgTrNR15197	Mt_Medtr1g046510,Mt_Medtr1g046790
MergedOrthoGroup000060		Ct_CtTrNR00066	Dg_DgTrNR11144	Mt_Medtr3g071470,Mt_Medtr5g014340
MergedOrthoGroup000061Sub001		Ct_CtTrNR00067	Dg_DgTrNR03018	Mt_Medtr2g054680,Mt_Medtr4g113990
MergedOrthoGroup000063Sub001		Ct_CtTrNR00069,Ct_CtTrNR09525	Dg_DgTrNR13130	Mt_Medtr3g091800
MergedOrthoGroup000063Sub002		Ct_CtTrNR10210	Dg_DgTrNR14324	Mt_Medtr1g067700,Mt_Medtr5g038540
MergedOrthoGroup000065		Ct_CtTrNR00073	Dg_DgTrNR09409	Mt_Medtr1g096890,Mt_Medtr3g032780,Mt_Medtr3g032830,Mt_Medtr3g115870
MergedOrthoGroup000066		Ct_CtTrNR00074	Dg_DgTrNR05091	Mt_Medtr2g098010,Mt_Medtr5g079740
MergedOrthoGroup000067		Ct_CtTrNR00075,Ct_CtTrNR14313	Dg_DgTrNR06170	Mt_Medtr2g079550,Mt_Medtr2g079580
MergedOrthoGroup000068		Ct_CtTrNR00076	Dg_DgTrNR11740	Mt_Medtr0035s0150
MergedOrthoGroup000070		Ct_CtTrNR00079	Dg_DgTrNR06385	Mt_Medtr8g091390
MergedOrthoGroup000071Sub001		Ct_CtTrNR00080	Dg_DgTrNR11705	Mt_Medtr0045s0130
MergedOrthoGroup000071Sub002		Ct_CtTrNR01776	Dg_DgTrNR12924	Mt_Medtr4g073970,Mt_Medtr4g073980,Mt_Medtr4g074030
MergedOrthoGroup000071Sub003		Ct_CtTrNR09597	Dg_DgTrNR01304	Mt_Medtr3g048950
MergedOrthoGroup000071Sub004		Ct_CtTrNR10296,Ct_CtTrNR13237	Dg_DgTrNR12732	Mt_Medtr3g049070
MergedOrthoGroup000072		Ct_CtTrNR00081	Dg_DgTrNR05069	Mt_Medtr7g075640
MergedOrthoGroup000073Sub001		Ct_CtTrNR01156	Dg_DgTrNR07981	Mt_Medtr8g010160,Mt_Medtr8g010170
MergedOrthoGroup000076		Ct_CtTrNR00085	Dg_DgTrNR07352,Dg_DgTrNR11793	Mt_Medtr3g087700
MergedOrthoGroup000077		Ct_CtTrNR00086	Dg_DgTrNR09402	Mt_Medtr8g006995
MergedOrthoGroup000089		Ct_CtTrNR00100,Ct_CtTrNR03573	Dg_DgTrNR13637	Mt_Medtr0280s0040,Mt_Medtr2g089360,Mt_Medtr2g089440,Mt_Medtr5g088435
MergedOrthoGroup000090	NSP2	Ct_CtTrNR00101	Dg_DgTrNR00363,Dg_DgTrNR01580	Mt_Medtr3g072710,Mt_Medtr5g058860
MergedOrthoGroup000092Sub001		Ct_CtTrNR00104	Dg_DgTrNR10787	Mt_Medtr1g022250,Mt_Medtr2g030420
MergedOrthoGroup000092Sub002		Ct_CtTrNR04977	Dg_DgTrNR09310	Mt_Medtr0011s0310,Mt_Medtr0662s0030,Mt_Medtr4g114140
MergedOrthoGroup000093Sub001		Ct_CtTrNR00105	Dg_DgTrNR14853,Dg_DgTrNR14854	Mt_Medtr2g027780
MergedOrthoGroup000097Sub001		Ct_CtTrNR00109,Ct_CtTrNR00110,Ct_CtTrNR14472	Dg_DgTrNR05646	Mt_Medtr4g117310
MergedOrthoGroup000097Sub002		Ct_CtTrNR10485	Dg_DgTrNR15438	Mt_Medtr1g034100,Mt_Medtr1g034130,Mt_Medtr1g034140
MergedOrthoGroup000101		Ct_CtTrNR00114,Ct_CtTrNR04944	Dg_DgTrNR07325	Mt_Medtr5g080390
MergedOrthoGroup000103		Ct_CtTrNR00116	Dg_DgTrNR13231	Mt_Medtr3g095010
MergedOrthoGroup000105		Ct_CtTrNR00118	Dg_DgTrNR11739	Mt_Medtr2g078680
MergedOrthoGroup000106		Ct_CtTrNR00119	Dg_DgTrNR15166,Dg_DgTrNR15167	Mt_Medtr4g112970
MergedOrthoGroup000113		Ct_CtTrNR00126	Dg_DgTrNR08359	Mt_Medtr4g085550
MergedOrthoGroup000115		Ct_CtTrNR00128	Dg_DgTrNR09140	Mt_Medtr2g013950,Mt_Medtr4g088695
MergedOrthoGroup000117		Ct_CtTrNR00130,Ct_CtTrNR11768	Dg_DgTrNR09666,Dg_DgTrNR14395	Mt_Medtr1g023230,Mt_Medtr3g112510
MergedOrthoGroup000119Sub001		Ct_CtTrNR00132	Dg_DgTrNR10147	Mt_Medtr7g118220
MergedOrthoGroup000120		Ct_CtTrNR00133	Dg_DgTrNR02476	Mt_Medtr8g011650
MergedOrthoGroup000121Sub001		Ct_CtTrNR00134	Dg_DgTrNR10680	Mt_Medtr8g076660
MergedOrthoGroup000121Sub002		Ct_CtTrNR09008	Dg_DgTrNR08128	Mt_Medtr5g021090
MergedOrthoGroup000122		Ct_CtTrNR00135	Dg_DgTrNR00646	Mt_Medtr7g062970
MergedOrthoGroup000127Sub001		Ct_CtTrNR00141	Dg_DgTrNR11275	Mt_Medtr4g125370
MergedOrthoGroup000127Sub002		Ct_CtTrNR02773	Dg_DgTrNR02607	Mt_Medtr4g125360
MergedOrthoGroup000128		Ct_CtTrNR00142	Dg_DgTrNR07545	Mt_Medtr2g098240,Mt_Medtr4g065080
MergedOrthoGroup000129		Ct_CtTrNR00143	Dg_DgTrNR03236,Dg_DgTrNR10956	Mt_Medtr4g073010
MergedOrthoGroup000131Sub001		Ct_CtTrNR00145	Dg_DgTrNR09501	Mt_Medtr2g099010,Mt_Medtr4g067320
MergedOrthoGroup000131Sub002		Ct_CtTrNR04785	Dg_DgTrNR11255	Mt_Medtr4g067360
MergedOrthoGroup000132		Ct_CtTrNR00146	Dg_DgTrNR10716	Mt_Medtr1g026078
MergedOrthoGroup000133		Ct_CtTrNR00147	Dg_DgTrNR01862,Dg_DgTrNR09160,Dg_DgTrNR11732	Mt_Medtr1g106815
MergedOrthoGroup000134		Ct_CtTrNR00148	Dg_DgTrNR06460	Mt_Medtr5g065350
MergedOrthoGroup000135		Ct_CtTrNR00150	Dg_DgTrNR09760	Mt_Medtr4g094942
MergedOrthoGroup000140		Ct_CtTrNR00155	Dg_DgTrNR02992	Mt_Medtr8g013670
MergedOrthoGroup000144		Ct_CtTrNR00160	Dg_DgTrNR01252	Mt_Medtr1g067600,Mt_Medtr7g100328
MergedOrthoGroup000145		Ct_CtTrNR00161	Dg_DgTrNR11370	Mt_Medtr6g009480
MergedOrthoGroup000146Sub001		Ct_CtTrNR00163	Dg_DgTrNR01875	Mt_Medtr3g109630
MergedOrthoGroup000150Sub001		Ct_CtTrNR10656,Ct_CtTrNR10657	Dg_DgTrNR00814,Dg_DgTrNR08781	Mt_Medtr6g013485,Mt_Medtr7g012290
MergedOrthoGroup000154Sub001		Ct_CtTrNR00173	Dg_DgTrNR09326	Mt_Medtr1g021990,Mt_Medtr3g111680
MergedOrthoGroup000154Sub002		Ct_CtTrNR06431	Dg_DgTrNR09014	Mt_Medtr1g022160
MergedOrthoGroup000154Sub003		Ct_CtTrNR12581	Dg_DgTrNR04443	Mt_Medtr6g009330
MergedOrthoGroup000158		Ct_CtTrNR00178	Dg_DgTrNR12912	Mt_Medtr8g091480
MergedOrthoGroup000159		Ct_CtTrNR00179	Dg_DgTrNR10673	Mt_Medtr6g084700
MergedOrthoGroup000164		Ct_CtTrNR00185,Ct_CtTrNR00375	Dg_DgTrNR11772	Mt_Medtr3g083480
MergedOrthoGroup000165		Ct_CtTrNR00186	Dg_DgTrNR10601	Mt_Medtr0276s0040,Mt_Medtr3g087250
MergedOrthoGroup000166		Ct_CtTrNR00187	Dg_DgTrNR11049	Mt_Medtr8g028230
MergedOrthoGroup000167Sub001		Ct_CtTrNR00188	Dg_DgTrNR08059	Mt_Medtr8g061030
MergedOrthoGroup000167Sub002		Ct_CtTrNR12687	Dg_DgTrNR07728	Mt_Medtr2g078630
MergedOrthoGroup000168		Ct_CtTrNR00189	Dg_DgTrNR15355	Mt_Medtr8g089630
MergedOrthoGroup000169		Ct_CtTrNR00190	Dg_DgTrNR11836	Mt_Medtr7g062140
MergedOrthoGroup000170		Ct_CtTrNR00192	Dg_DgTrNR10573	Mt_Medtr1g115345,Mt_Medtr5g076290,Mt_Medtr7g023560
MergedOrthoGroup000173		Ct_CtTrNR00195	Dg_DgTrNR11619	Mt_Medtr2g101870
MergedOrthoGroup000175Sub001		Ct_CtTrNR12824	Dg_DgTrNR09479	Mt_Medtr3g068065,Mt_Medtr3g068070,Mt_Medtr3g068075,Mt_Medtr3g068085,Mt_Medtr3g068155,Mt_Medtr3g068175
MergedOrthoGroup000178		Ct_CtTrNR00200	Dg_DgTrNR11993	Mt_Medtr6g033275
MergedOrthoGroup000179		Ct_CtTrNR00201,Ct_CtTrNR02013	Dg_DgTrNR14896	Mt_Medtr1g105040
MergedOrthoGroup000180		Ct_CtTrNR00203	Dg_DgTrNR11523	Mt_Medtr1g107490
MergedOrthoGroup000181Sub001		Ct_CtTrNR00204,Ct_CtTrNR10008	Dg_DgTrNR07409,Dg_DgTrNR09949,Dg_DgTrNR13116	Mt_Medtr8g106520,Mt_Medtr8g106530
MergedOrthoGroup000181Sub002		Ct_CtTrNR04356,Ct_CtTrNR14550	Dg_DgTrNR01478	Mt_Medtr0283s0030,Mt_Medtr6g082000,Mt_Medtr8g106560
MergedOrthoGroup000182		Ct_CtTrNR00206	Dg_DgTrNR11649	Mt_Medtr3g086760
MergedOrthoGroup000184Sub001		Ct_CtTrNR00210,Ct_CtTrNR12932	Dg_DgTrNR09503	Mt_Medtr2g013930,Mt_Medtr7g111950
MergedOrthoGroup000187Sub001		Ct_CtTrNR00213	Dg_DgTrNR09343,Dg_DgTrNR10743	Mt_Medtr1g089180,Mt_Medtr2g045090
MergedOrthoGroup000188Sub001		Ct_CtTrNR00215	Dg_DgTrNR00516	Mt_Medtr2g105210,Mt_Medtr8g099835
MergedOrthoGroup000188Sub002		Ct_CtTrNR03968	Dg_DgTrNR08495	Mt_Medtr4g086240
MergedOrthoGroup000189		Ct_CtTrNR00216,Ct_CtTrNR11945,Ct_CtTrNR15064,Ct_CtTrNR15065	Dg_DgTrNR04635	Mt_Medtr4g061700,Mt_Medtr4g061800
MergedOrthoGroup000190Sub001		Ct_CtTrNR01334	Dg_DgTrNR06773	Mt_Medtr6g081930,Mt_Medtr8g106580
MergedOrthoGroup000190Sub002		Ct_CtTrNR12001	Dg_DgTrNR00057	Mt_Medtr1g019250
MergedOrthoGroup000191		Ct_CtTrNR00219	Dg_DgTrNR01697	Mt_Medtr7g080730
MergedOrthoGroup000193Sub001		Ct_CtTrNR00221	Dg_DgTrNR03941	Mt_Medtr5g066740
MergedOrthoGroup000194		Ct_CtTrNR00222	Dg_DgTrNR13224	Mt_Medtr2g019575,Mt_Medtr8g024590,Mt_Medtr8g024600
MergedOrthoGroup000195		Ct_CtTrNR00223	Dg_DgTrNR04555	Mt_Medtr1g116230
MergedOrthoGroup000198Sub001		Ct_CtTrNR00227	Dg_DgTrNR05956	Mt_Medtr3g109290
MergedOrthoGroup000199Sub001		Ct_CtTrNR00228	Dg_DgTrNR05350,Dg_DgTrNR09925	Mt_Medtr3g078240,Mt_Medtr4g106650
MergedOrthoGroup000199Sub002		Ct_CtTrNR06940	Dg_DgTrNR15305	Mt_Medtr3g105390
MergedOrthoGroup000199Sub003		Ct_CtTrNR12297	Dg_DgTrNR14983	Mt_Medtr4g079220,Mt_Medtr4g106640
MergedOrthoGroup000200		Ct_CtTrNR00229	Dg_DgTrNR07301	Mt_Medtr3g465590,Mt_Medtr5g072500
MergedOrthoGroup000206Sub001		Ct_CtTrNR00244	Dg_DgTrNR01951	Mt_Medtr7g117280
MergedOrthoGroup000207Sub001		Ct_CtTrNR01366	Dg_DgTrNR01048	Mt_Medtr5g038220
MergedOrthoGroup000208		Ct_CtTrNR00246	Dg_DgTrNR01310	Mt_Medtr1g099010,Mt_Medtr6g034975
MergedOrthoGroup000210		Ct_CtTrNR00248	Dg_DgTrNR04714	Mt_Medtr7g406860
MergedOrthoGroup000216		Ct_CtTrNR00257	Dg_DgTrNR07204	Mt_Medtr1g107495
MergedOrthoGroup000217		Ct_CtTrNR00258	Dg_DgTrNR02735	Mt_Medtr0053s0020,Mt_Medtr0092s0090
MergedOrthoGroup000218		Ct_CtTrNR00259	Dg_DgTrNR09946	Mt_Medtr3g073300
MergedOrthoGroup000219		Ct_CtTrNR00260	Dg_DgTrNR09967	Mt_Medtr4g100380
MergedOrthoGroup000220Sub001		Ct_CtTrNR00261	Dg_DgTrNR03736	Mt_Medtr6g027590,Mt_Medtr6g471010
MergedOrthoGroup000220Sub002		Ct_CtTrNR01698	Dg_DgTrNR14570	Mt_Medtr2g104610
MergedOrthoGroup000226Sub001		Ct_CtTrNR06682	Dg_DgTrNR07445	Mt_Medtr1g009155,Mt_Medtr1g009210,Mt_Medtr3g109250
MergedOrthoGroup000227		Ct_CtTrNR00268	Dg_DgTrNR14430	Mt_Medtr0003s0580,Mt_Medtr3g028060,Mt_Medtr3g034370,Mt_Medtr3g034410,Mt_Medtr3g034540
MergedOrthoGroup000229		Ct_CtTrNR00271	Dg_DgTrNR02718	Mt_Medtr4g063895
MergedOrthoGroup000230		Ct_CtTrNR00272,Ct_CtTrNR00273	Dg_DgTrNR05628	Mt_Medtr8g083150
MergedOrthoGroup000231		Ct_CtTrNR00274	Dg_DgTrNR11965	Mt_Medtr2g438140,Mt_Medtr4g094662
MergedOrthoGroup000232Sub001		Ct_CtTrNR01733	Dg_DgTrNR11892	Mt_Medtr4g131190
MergedOrthoGroup000233		Ct_CtTrNR00276	Dg_DgTrNR09781	Mt_Medtr5g020530
MergedOrthoGroup000234		Ct_CtTrNR00277	Dg_DgTrNR11980	Mt_Medtr4g033790
MergedOrthoGroup000235		Ct_CtTrNR00278	Dg_DgTrNR11013	Mt_Medtr7g017400
MergedOrthoGroup000236Sub001		Ct_CtTrNR00279	Dg_DgTrNR10779	Mt_Medtr1g022050
MergedOrthoGroup000236Sub002		Ct_CtTrNR06452	Dg_DgTrNR08788	Mt_Medtr4g007390,Mt_Medtr4g007420,Mt_Medtr4g127640
MergedOrthoGroup000238		Ct_CtTrNR00281	Dg_DgTrNR00916	Mt_Medtr2g079560,Mt_Medtr4g048500
MergedOrthoGroup000242Sub001		Ct_CtTrNR15178	Dg_DgTrNR14735	Mt_Medtr4g114030
MergedOrthoGroup000243		Ct_CtTrNR00286	Dg_DgTrNR09814	Mt_Medtr3g092830,Mt_Medtr3g092840
MergedOrthoGroup000244		Ct_CtTrNR00287	Dg_DgTrNR06007	Mt_Medtr5g067060
MergedOrthoGroup000246		Ct_CtTrNR00290	Dg_DgTrNR14838	Mt_Medtr4g128670
MergedOrthoGroup000248		Ct_CtTrNR00293	Dg_DgTrNR07457,Dg_DgTrNR10476	Mt_Medtr4g086340
MergedOrthoGroup000250		Ct_CtTrNR00295	Dg_DgTrNR07256	Mt_Medtr3g096860,Mt_Medtr8g094200
MergedOrthoGroup000252		Ct_CtTrNR00297	Dg_DgTrNR10396	Mt_Medtr2g012520,Mt_Medtr4g090520
MergedOrthoGroup000254Sub001		Ct_CtTrNR00299	Dg_DgTrNR10512	Mt_Medtr4g095780,Mt_Medtr5g015690
MergedOrthoGroup000256		Ct_CtTrNR00301	Dg_DgTrNR13960	Mt_Medtr7g088500,Mt_Medtr7g088560,Mt_Medtr7g088570
MergedOrthoGroup000258Sub001		Ct_CtTrNR00303	Dg_DgTrNR07983	Mt_Medtr2g010760,Mt_Medtr4g092140
MergedOrthoGroup000258Sub002		Ct_CtTrNR08612	Dg_DgTrNR06835	Mt_Medtr2g010750
MergedOrthoGroup000260Sub001		Ct_CtTrNR00305	Dg_DgTrNR00865	Mt_Medtr4g092040
MergedOrthoGroup000261Sub001		Ct_CtTrNR00306	Dg_DgTrNR04586	Mt_Medtr5g025980
MergedOrthoGroup000261Sub002		Ct_CtTrNR06144	Dg_DgTrNR07571	Mt_Medtr2g069330
MergedOrthoGroup000261Sub003		Ct_CtTrNR11249	Dg_DgTrNR04470	Mt_Medtr1g073720,Mt_Medtr2g070740,Mt_Medtr8g008730
MergedOrthoGroup000264		Ct_CtTrNR00310	Dg_DgTrNR14332	Mt_Medtr3g465430
MergedOrthoGroup000266		Ct_CtTrNR00312	Dg_DgTrNR01777,Dg_DgTrNR01778	Mt_Medtr2g010460,Mt_Medtr4g134220
MergedOrthoGroup000267		Ct_CtTrNR00313	Dg_DgTrNR05518	Mt_Medtr7g079900
MergedOrthoGroup000269		Ct_CtTrNR00315	Dg_DgTrNR08055	Mt_Medtr7g081130,Mt_Medtr8g007380
MergedOrthoGroup000271		Ct_CtTrNR00317	Dg_DgTrNR12197	Mt_Medtr7g075770
MergedOrthoGroup000272		Ct_CtTrNR00318	Dg_DgTrNR02524	Mt_Medtr5g015270
MergedOrthoGroup000274Sub001		Ct_CtTrNR00320	Dg_DgTrNR11582	Mt_Medtr3g096920,Mt_Medtr8g094580
MergedOrthoGroup000274Sub002		Ct_CtTrNR00340	Dg_DgTrNR05742,Dg_DgTrNR09829	Mt_Medtr3g096930,Mt_Medtr8g094590
MergedOrthoGroup000276Sub001		Ct_CtTrNR00322	Dg_DgTrNR05255	Mt_Medtr1g069560
MergedOrthoGroup000276Sub002		Ct_CtTrNR15156	Dg_DgTrNR10551	Mt_Medtr1g045505,Mt_Medtr2g055920
MergedOrthoGroup000277		Ct_CtTrNR00323	Dg_DgTrNR02363	Mt_Medtr0421s0030,Mt_Medtr1g054300
MergedOrthoGroup000278		Ct_CtTrNR00324	Dg_DgTrNR14440	Mt_Medtr8g098915
MergedOrthoGroup000280		Ct_CtTrNR00327	Dg_DgTrNR09738,Dg_DgTrNR15425	Mt_Medtr7g117695,Mt_Medtr8g027435
MergedOrthoGroup000281		Ct_CtTrNR00328	Dg_DgTrNR10082	Mt_Medtr2g089310
MergedOrthoGroup000284Sub001		Ct_CtTrNR11028	Dg_DgTrNR04441	Mt_Medtr3g079190
MergedOrthoGroup000287Sub001		Ct_CtTrNR00338	Dg_DgTrNR10837	Mt_Medtr4g098660
MergedOrthoGroup000287Sub002		Ct_CtTrNR02389	Dg_DgTrNR12401	Mt_Medtr0085s0010
MergedOrthoGroup000287Sub003		Ct_CtTrNR02416	Dg_DgTrNR06055	Mt_Medtr2g016740
MergedOrthoGroup000287Sub004		Ct_CtTrNR03364	Dg_DgTrNR07647	Mt_Medtr2g023920
MergedOrthoGroup000287Sub005		Ct_CtTrNR04178	Dg_DgTrNR08105	Mt_Medtr4g005450,Mt_Medtr4g005480,Mt_Medtr4g094510,Mt_Medtr4g094512
MergedOrthoGroup000287Sub006		Ct_CtTrNR05664	Dg_DgTrNR00952	Mt_Medtr5g026660
MergedOrthoGroup000287Sub007		Ct_CtTrNR09477	Dg_DgTrNR02823	Mt_Medtr8g005870
MergedOrthoGroup000287Sub008		Ct_CtTrNR09738	Dg_DgTrNR00149	Mt_Medtr1g010040,Mt_Medtr3g108660
MergedOrthoGroup000287Sub009		Ct_CtTrNR12378	Dg_DgTrNR01548,Dg_DgTrNR07338	Mt_Medtr6g022160,Mt_Medtr7g031900
MergedOrthoGroup000287Sub010		Ct_CtTrNR13364	Dg_DgTrNR02165,Dg_DgTrNR10611	Mt_Medtr2g026670,Mt_Medtr4g133900,Mt_Medtr7g056413
MergedOrthoGroup000287Sub011		Ct_CtTrNR14825	Dg_DgTrNR13095	Mt_Medtr7g066990
MergedOrthoGroup000289		Ct_CtTrNR00341	Dg_DgTrNR13907	Mt_Medtr7g090350,Mt_Medtr8g013660
MergedOrthoGroup000290		Ct_CtTrNR00342	Dg_DgTrNR09414	Mt_Medtr2g043710,Mt_Medtr4g124850
MergedOrthoGroup000291Sub001		Ct_CtTrNR11745	Dg_DgTrNR13090	Mt_Medtr4g083360
MergedOrthoGroup000292Sub001		Ct_CtTrNR03452	Dg_DgTrNR15142,Dg_DgTrNR15144	Mt_Medtr1g040460
MergedOrthoGroup000292Sub002		Ct_CtTrNR10577	Dg_DgTrNR13066	Mt_Medtr1g090300
MergedOrthoGroup000293		Ct_CtTrNR00345	Dg_DgTrNR09390,Dg_DgTrNR11843	Mt_Medtr1g115510,Mt_Medtr7g021300
MergedOrthoGroup000295Sub001		Ct_CtTrNR00347	Dg_DgTrNR06197	Mt_Medtr1g085630,Mt_Medtr2g058550,Mt_Medtr3g449450
MergedOrthoGroup000295Sub002		Ct_CtTrNR08371	Dg_DgTrNR10246	Mt_Medtr7g116300
MergedOrthoGroup000297		Ct_CtTrNR00349	Dg_DgTrNR09464	Mt_Medtr4g119860
MergedOrthoGroup000298Sub001		Ct_CtTrNR01087	Dg_DgTrNR02198	Mt_Medtr5g011180
MergedOrthoGroup000298Sub002		Ct_CtTrNR04734	Dg_DgTrNR06951	Mt_Medtr2g043010,Mt_Medtr2g101700
MergedOrthoGroup000298Sub003		Ct_CtTrNR05755	Dg_DgTrNR00923	Mt_Medtr3g008530
MergedOrthoGroup000300		Ct_CtTrNR00352	Dg_DgTrNR11274	Mt_Medtr1g057590,Mt_Medtr1g057600
MergedOrthoGroup000301Sub001		Ct_CtTrNR00353	Dg_DgTrNR02354	Mt_Medtr3g096675
MergedOrthoGroup000301Sub002		Ct_CtTrNR10597	Dg_DgTrNR04830	Mt_Medtr0095s0110,Mt_Medtr3g096670,Mt_Medtr8g094150,Mt_Medtr8g094190
MergedOrthoGroup000303Sub001		Ct_CtTrNR08642	Dg_DgTrNR15122	Mt_Medtr1g021970,Mt_Medtr3g111670
MergedOrthoGroup000304Sub001		Ct_CtTrNR00357	Dg_DgTrNR14214	Mt_Medtr6g069420
MergedOrthoGroup000304Sub002		Ct_CtTrNR02506	Dg_DgTrNR07678	Mt_Medtr3g114070
MergedOrthoGroup000306		Ct_CtTrNR00359	Dg_DgTrNR07744	Mt_Medtr6g086635,Mt_Medtr8g103540
MergedOrthoGroup000307		Ct_CtTrNR00360	Dg_DgTrNR10090	Mt_Medtr7g080300
MergedOrthoGroup000310		Ct_CtTrNR00365	Dg_DgTrNR05259	Mt_Medtr5g043580
MergedOrthoGroup000311		Ct_CtTrNR00366	Dg_DgTrNR09538,Dg_DgTrNR10413	Mt_Medtr4g120825,Mt_Medtr4g120830,Mt_Medtr8g104765
MergedOrthoGroup000314		Ct_CtTrNR00369	Dg_DgTrNR06222,Dg_DgTrNR10863	Mt_Medtr3g084090
MergedOrthoGroup000315		Ct_CtTrNR00370	Dg_DgTrNR07322	Mt_Medtr1g025570,Mt_Medtr7g407030
MergedOrthoGroup000317		Ct_CtTrNR00372	Dg_DgTrNR08493	Mt_Medtr3g096870
MergedOrthoGroup000318		Ct_CtTrNR00373	Dg_DgTrNR04780	Mt_Medtr1g052885,Mt_Medtr2g089210
MergedOrthoGroup000319Sub001		Ct_CtTrNR00374	Dg_DgTrNR12434	Mt_Medtr2g461200,Mt_Medtr4g019610
MergedOrthoGroup000319Sub002		Ct_CtTrNR01651	Dg_DgTrNR05605	Mt_Medtr5g088660,Mt_Medtr5g088685
MergedOrthoGroup000324		Ct_CtTrNR00381	Dg_DgTrNR04535	Mt_Medtr4g100760
MergedOrthoGroup000326		Ct_CtTrNR00383	Dg_DgTrNR10296	Mt_Medtr7g062610
MergedOrthoGroup000329		Ct_CtTrNR00387	Dg_DgTrNR10200	Mt_Medtr3g115300
MergedOrthoGroup000330Sub001		Ct_CtTrNR00389	Dg_DgTrNR12706	Mt_Medtr3g084040
MergedOrthoGroup000330Sub002		Ct_CtTrNR07420,Ct_CtTrNR14278	Dg_DgTrNR02698	Mt_Medtr5g085270,Mt_Medtr7g106780,Mt_Medtr8g466190
MergedOrthoGroup000331Sub001		Ct_CtTrNR06125	Dg_DgTrNR13407	Mt_Medtr4g075200,Mt_Medtr5g075800
MergedOrthoGroup000332		Ct_CtTrNR00391,Ct_CtTrNR03267	Dg_DgTrNR08319	Mt_Medtr8g007020,Mt_Medtr8g007035
MergedOrthoGroup000333Sub001		Ct_CtTrNR00392	Dg_DgTrNR14451	Mt_Medtr8g090230
MergedOrthoGroup000333Sub002		Ct_CtTrNR12455	Dg_DgTrNR11266	Mt_Medtr3g079680,Mt_Medtr3g087190
MergedOrthoGroup000335Sub001		Ct_CtTrNR00519	Dg_DgTrNR10322	Mt_Medtr1g008765,Mt_Medtr7g024280,Mt_Medtr7g024300
MergedOrthoGroup000335Sub002		Ct_CtTrNR04783	Dg_DgTrNR04871	Mt_Medtr7g117435,Mt_Medtr8g028485,Mt_Medtr8g087440
MergedOrthoGroup000335Sub003		Ct_CtTrNR05436	Dg_DgTrNR08165	Mt_Medtr7g024190
MergedOrthoGroup000335Sub004		Ct_CtTrNR10087	Dg_DgTrNR05395,Dg_DgTrNR05396	Mt_Medtr3g117350,Mt_Medtr4g071540
MergedOrthoGroup000335Sub005		Ct_CtTrNR12080	Dg_DgTrNR10159	Mt_Medtr7g024320
MergedOrthoGroup000336		Ct_CtTrNR00395	Dg_DgTrNR01235	Mt_Medtr3g031070
MergedOrthoGroup000337		Ct_CtTrNR00396	Dg_DgTrNR09352	Mt_Medtr2g023890
MergedOrthoGroup000338Sub001		Ct_CtTrNR03564	Dg_DgTrNR06088	Mt_Medtr5g090130
MergedOrthoGroup000340		Ct_CtTrNR00400	Dg_DgTrNR06433	Mt_Medtr2g033490
MergedOrthoGroup000341Sub001		Ct_CtTrNR00401,Ct_CtTrNR14846,Ct_CtTrNR14847	Dg_DgTrNR01452,Dg_DgTrNR01456	Mt_Medtr3g491840,Mt_Medtr3g491860
MergedOrthoGroup000344		Ct_CtTrNR00404	Dg_DgTrNR14206	Mt_Medtr1g051105
MergedOrthoGroup000347		Ct_CtTrNR00407	Dg_DgTrNR05394	Mt_Medtr4g101100
MergedOrthoGroup000353Sub001		Ct_CtTrNR00414	Dg_DgTrNR10211	Mt_Medtr8g070015,Mt_Medtr8g070040
MergedOrthoGroup000354		Ct_CtTrNR00415	Dg_DgTrNR06386	Mt_Medtr6g086290,Mt_Medtr7g116720
MergedOrthoGroup000355		Ct_CtTrNR00416	Dg_DgTrNR05604	Mt_Medtr2g061720
MergedOrthoGroup000356Sub001		Ct_CtTrNR08138	Dg_DgTrNR04302	Mt_Medtr1g072140
MergedOrthoGroup000356Sub002		Ct_CtTrNR08894	Dg_DgTrNR13816	Mt_Medtr4g095000,Mt_Medtr7g095030
MergedOrthoGroup000361		Ct_CtTrNR00423	Dg_DgTrNR10000	Mt_Medtr1g077790
MergedOrthoGroup000363Sub001		Ct_CtTrNR00425	Dg_DgTrNR09790	Mt_Medtr4g077320,Mt_Medtr4g077490
MergedOrthoGroup000363Sub002		Ct_CtTrNR04299	Dg_DgTrNR07760	Mt_Medtr2g025740,Mt_Medtr4g133060
MergedOrthoGroup000364		Ct_CtTrNR00426,Ct_CtTrNR13373	Dg_DgTrNR08583	Mt_Medtr4g078150,Mt_Medtr8g090270,Mt_Medtr8g090275,Mt_Medtr8g090285
MergedOrthoGroup000365		Ct_CtTrNR00429	Dg_DgTrNR08062	Mt_Medtr8g090295
MergedOrthoGroup000366Sub001		Ct_CtTrNR00524	Dg_DgTrNR12167	Mt_Medtr2g083910,Mt_Medtr4g080340
MergedOrthoGroup000366Sub002		Ct_CtTrNR06271	Dg_DgTrNR03499	Mt_Medtr5g041650
MergedOrthoGroup000371		Ct_CtTrNR00436	Dg_DgTrNR07485	Mt_Medtr2g044200
MergedOrthoGroup000373Sub001		Ct_CtTrNR02741	Dg_DgTrNR12018	Mt_Medtr4g032670
MergedOrthoGroup000373Sub002		Ct_CtTrNR08051	Dg_DgTrNR00888	Mt_Medtr6g004180
MergedOrthoGroup000373Sub003		Ct_CtTrNR10165	Dg_DgTrNR09523	Mt_Medtr4g068990,Mt_Medtr5g092560
MergedOrthoGroup000378Sub001		Ct_CtTrNR00445	Dg_DgTrNR06434	Mt_Medtr3g060690
MergedOrthoGroup000378Sub002		Ct_CtTrNR03860	Dg_DgTrNR06935	Mt_Medtr4g036845
MergedOrthoGroup000378Sub003		Ct_CtTrNR04185	Dg_DgTrNR08396	Mt_Medtr7g017430
MergedOrthoGroup000378Sub004		Ct_CtTrNR05245	Dg_DgTrNR03814	Mt_Medtr4g132570
MergedOrthoGroup000378Sub005		Ct_CtTrNR06480	Dg_DgTrNR13826	Mt_Medtr4g084070
MergedOrthoGroup000378Sub006		Ct_CtTrNR12605	Dg_DgTrNR12202	Mt_Medtr2g060420
MergedOrthoGroup000381		Ct_CtTrNR00449	Dg_DgTrNR08913	Mt_Medtr2g006740,Mt_Medtr3g083350
MergedOrthoGroup000382		Ct_CtTrNR00451	Dg_DgTrNR09231	Mt_Medtr4g097030
MergedOrthoGroup000383		Ct_CtTrNR00452	Dg_DgTrNR13474	Mt_Medtr1g032580
MergedOrthoGroup000384		Ct_CtTrNR00455	Dg_DgTrNR11200	Mt_Medtr6g021670,Mt_Medtr6g085000
MergedOrthoGroup000385Sub001		Ct_CtTrNR00456	Dg_DgTrNR12542,Dg_DgTrNR15397	Mt_Medtr2g104230,Mt_Medtr4g009760
MergedOrthoGroup000388		Ct_CtTrNR00460	Dg_DgTrNR04013,Dg_DgTrNR05618	Mt_Medtr1g038650
MergedOrthoGroup000390		Ct_CtTrNR00463	Dg_DgTrNR13721	Mt_Medtr7g079500
MergedOrthoGroup000391		Ct_CtTrNR00464	Dg_DgTrNR10546	Mt_Medtr4g114000
MergedOrthoGroup000392		Ct_CtTrNR00465	Dg_DgTrNR06147	Mt_Medtr1g104630,Mt_Medtr5g006130
MergedOrthoGroup000393		Ct_CtTrNR00466,Ct_CtTrNR10532	Dg_DgTrNR12338	Mt_Medtr3g040680,Mt_Medtr3g074040
MergedOrthoGroup000394Sub001		Ct_CtTrNR00467	Dg_DgTrNR13227,Dg_DgTrNR13229	Mt_Medtr4g073420
MergedOrthoGroup000396		Ct_CtTrNR00469	Dg_DgTrNR07750	Mt_Medtr4g021820
MergedOrthoGroup000397		Ct_CtTrNR00470	Dg_DgTrNR00281,Dg_DgTrNR00282	Mt_Medtr7g118200,Mt_Medtr8g024310
MergedOrthoGroup000401		Ct_CtTrNR00476	Dg_DgTrNR04885	Mt_Medtr8g063700
MergedOrthoGroup000402		Ct_CtTrNR00477	Dg_DgTrNR09435	Mt_Medtr3g113620
MergedOrthoGroup000403Sub001		Ct_CtTrNR00478	Dg_DgTrNR10489	Mt_Medtr3g106290
MergedOrthoGroup000404		Ct_CtTrNR00479	Dg_DgTrNR07201	Mt_Medtr8g072680
MergedOrthoGroup000405Sub001		Ct_CtTrNR00480	Dg_DgTrNR05827	Mt_Medtr3g070170,Mt_Medtr5g081960
MergedOrthoGroup000406Sub001		Ct_CtTrNR00481	Dg_DgTrNR00790	Mt_Medtr3g106160
MergedOrthoGroup000406Sub002		Ct_CtTrNR09261	Dg_DgTrNR08377,Dg_DgTrNR08378	Mt_Medtr5g081900
MergedOrthoGroup000408		Ct_CtTrNR00483	Dg_DgTrNR04102	Mt_Medtr4g063150
MergedOrthoGroup000410		Ct_CtTrNR00485	Dg_DgTrNR04527	Mt_Medtr5g009500
MergedOrthoGroup000411		Ct_CtTrNR00486	Dg_DgTrNR09520	Mt_Medtr2g460600
MergedOrthoGroup000413		Ct_CtTrNR00488	Dg_DgTrNR09747	Mt_Medtr3g045440,Mt_Medtr6g086560
MergedOrthoGroup000417Sub001		Ct_CtTrNR00492	Dg_DgTrNR14638	Mt_Medtr8g075110
MergedOrthoGroup000417Sub002		Ct_CtTrNR04562	Dg_DgTrNR05101	Mt_Medtr5g022790,Mt_Medtr8g075120
MergedOrthoGroup000417Sub003		Ct_CtTrNR06580	Dg_DgTrNR12279,Dg_DgTrNR12590	Mt_Medtr1g025920,Mt_Medtr3g114340,Mt_Medtr3g114450
MergedOrthoGroup000418Sub001		Ct_CtTrNR00493	Dg_DgTrNR04175	Mt_Medtr8g106220
MergedOrthoGroup000423		Ct_CtTrNR00500	Dg_DgTrNR09642	Mt_Medtr1g062770
MergedOrthoGroup000425Sub001		Ct_CtTrNR00502	Dg_DgTrNR13680	Mt_Medtr0446s0050,Mt_Medtr2g026695,Mt_Medtr4g133970
MergedOrthoGroup000425Sub002		Ct_CtTrNR01687	Dg_DgTrNR04018	Mt_Medtr4g133932
MergedOrthoGroup000426		Ct_CtTrNR00503	Dg_DgTrNR03772,Dg_DgTrNR10614	Mt_Medtr1g076470
MergedOrthoGroup000430		Ct_CtTrNR00507	Dg_DgTrNR10096	Mt_Medtr1g107475
MergedOrthoGroup000432		Ct_CtTrNR00509	Dg_DgTrNR10106	Mt_Medtr2g038550,Mt_Medtr4g126790
MergedOrthoGroup000433Sub001		Ct_CtTrNR00510,Ct_CtTrNR13934	Dg_DgTrNR07676	Mt_Medtr4g134610
MergedOrthoGroup000433Sub002		Ct_CtTrNR00581	Dg_DgTrNR12372	Mt_Medtr4g134630
MergedOrthoGroup000434		Ct_CtTrNR00512	Dg_DgTrNR11343	Mt_Medtr7g102770
MergedOrthoGroup000436		Ct_CtTrNR00514	Dg_DgTrNR01902	Mt_Medtr3g087160,Mt_Medtr8g090215
MergedOrthoGroup000438Sub001		Ct_CtTrNR00516	Dg_DgTrNR09757	Mt_Medtr4g070010
MergedOrthoGroup000438Sub002		Ct_CtTrNR09741	Dg_DgTrNR12749	Mt_Medtr3g116590,Mt_Medtr4g069970
MergedOrthoGroup000439Sub001		Ct_CtTrNR00517	Dg_DgTrNR07514	Mt_Medtr7g061660
MergedOrthoGroup000443		Ct_CtTrNR00522	Dg_DgTrNR14131	Mt_Medtr4g098510
MergedOrthoGroup000444		Ct_CtTrNR00523	Dg_DgTrNR02242	Mt_Medtr1g026400
MergedOrthoGroup000445		Ct_CtTrNR00525	Dg_DgTrNR01788	Mt_Medtr6g016240
MergedOrthoGroup000448		Ct_CtTrNR00528	Dg_DgTrNR14630	Mt_Medtr7g085650
MergedOrthoGroup000450		Ct_CtTrNR00530	Dg_DgTrNR08634	Mt_Medtr1g107330
MergedOrthoGroup000451Sub001		Ct_CtTrNR00531	Dg_DgTrNR03652	Mt_Medtr7g099940
MergedOrthoGroup000451Sub002		Ct_CtTrNR10136	Dg_DgTrNR02359	Mt_Medtr1g068845
MergedOrthoGroup000451Sub003		Ct_CtTrNR12720	Dg_DgTrNR00932	Mt_Medtr1g068930
MergedOrthoGroup000454		Ct_CtTrNR00535	Dg_DgTrNR04121	Mt_Medtr3g087850,Mt_Medtr3g087860
MergedOrthoGroup000455Sub001		Ct_CtTrNR13694	Dg_DgTrNR10217	Mt_Medtr0012s0110,Mt_Medtr3g045130,Mt_Medtr5g022690
MergedOrthoGroup000457Sub001		Ct_CtTrNR00538	Dg_DgTrNR12955	Mt_Medtr4g086600
MergedOrthoGroup000457Sub002		Ct_CtTrNR04092	Dg_DgTrNR14596	Mt_Medtr3g104720
MergedOrthoGroup000458Sub001		Ct_CtTrNR00539	Dg_DgTrNR10480	Mt_Medtr1g083310,Mt_Medtr7g113110
MergedOrthoGroup000459		Ct_CtTrNR00540	Dg_DgTrNR10381	Mt_Medtr1g107565
MergedOrthoGroup000461Sub001		Ct_CtTrNR00543	Dg_DgTrNR09756	Mt_Medtr5g044970
MergedOrthoGroup000462Sub001		Ct_CtTrNR00544	Dg_DgTrNR15113	Mt_Medtr4g086640
MergedOrthoGroup000462Sub002		Ct_CtTrNR01517,Ct_CtTrNR06430	Dg_DgTrNR09220	Mt_Medtr8g069460
MergedOrthoGroup000463Sub001		Ct_CtTrNR00545	Dg_DgTrNR08523	Mt_Medtr4g084040
MergedOrthoGroup000464Sub001		Ct_CtTrNR08305	Dg_DgTrNR11595	Mt_Medtr6g088745
MergedOrthoGroup000466		Ct_CtTrNR00548	Dg_DgTrNR02869	Mt_Medtr6g038150
MergedOrthoGroup000469		Ct_CtTrNR00552	Dg_DgTrNR10646	Mt_Medtr3g106930
MergedOrthoGroup000470Sub001		Ct_CtTrNR00553	Dg_DgTrNR11497	Mt_Medtr3g099130
MergedOrthoGroup000470Sub002		Ct_CtTrNR09361,Ct_CtTrNR11935	Dg_DgTrNR03783	Mt_Medtr1g026160,Mt_Medtr3g114900
MergedOrthoGroup000474		Ct_CtTrNR00557	Dg_DgTrNR06750	Mt_Medtr3g072330
MergedOrthoGroup000476		Ct_CtTrNR00560	Dg_DgTrNR07378	Mt_Medtr3g023510
MergedOrthoGroup000477		Ct_CtTrNR00561	Dg_DgTrNR09750	Mt_Medtr5g034200,Mt_Medtr8g064760
MergedOrthoGroup000478		Ct_CtTrNR00562	Dg_DgTrNR11808	Mt_Medtr5g021230
MergedOrthoGroup000483		Ct_CtTrNR00567	Dg_DgTrNR10811	Mt_Medtr7g117730,Mt_Medtr8g027345
MergedOrthoGroup000484Sub001		Ct_CtTrNR00568	Dg_DgTrNR14780	Mt_Medtr3g072620
MergedOrthoGroup000486		Ct_CtTrNR00572	Dg_DgTrNR11261	Mt_Medtr2g016680
MergedOrthoGroup000488Sub001		Ct_CtTrNR00574	Dg_DgTrNR05185	Mt_Medtr1g089260
MergedOrthoGroup000488Sub002		Ct_CtTrNR03790	Dg_DgTrNR01539	Mt_Medtr1g089370
MergedOrthoGroup000490		Ct_CtTrNR00576	Dg_DgTrNR01754	Mt_Medtr1g046460
MergedOrthoGroup000493Sub001		Ct_CtTrNR00579	Dg_DgTrNR07329	Mt_Medtr3g070070
MergedOrthoGroup000493Sub002		Ct_CtTrNR07351	Dg_DgTrNR08966	Mt_Medtr2g062860
MergedOrthoGroup000494		Ct_CtTrNR00580	Dg_DgTrNR13269	Mt_Medtr7g101070
MergedOrthoGroup000495		Ct_CtTrNR00582,Ct_CtTrNR00583	Dg_DgTrNR06654	Mt_Medtr3g095020
MergedOrthoGroup000496		Ct_CtTrNR00584	Dg_DgTrNR00039	Mt_Medtr4g050050
MergedOrthoGroup000499Sub001		Ct_CtTrNR00587	Dg_DgTrNR11340	Mt_Medtr1g086000
MergedOrthoGroup000499Sub002		Ct_CtTrNR01917	Dg_DgTrNR09449	Mt_Medtr5g085980
MergedOrthoGroup000500		Ct_CtTrNR00588	Dg_DgTrNR03709	Mt_Medtr3g005140
MergedOrthoGroup000503		Ct_CtTrNR00591	Dg_DgTrNR05871	Mt_Medtr3g112260,Mt_Medtr3g117230
MergedOrthoGroup000504Sub001		Ct_CtTrNR00593	Dg_DgTrNR02793,Dg_DgTrNR05708	Mt_Medtr5g090770
MergedOrthoGroup000504Sub002		Ct_CtTrNR10692	Dg_DgTrNR02267	Mt_Medtr6g086755,Mt_Medtr7g099880
MergedOrthoGroup000505		Ct_CtTrNR00594	Dg_DgTrNR01268	Mt_Medtr2g104465,Mt_Medtr4g017520,Mt_Medtr4g085570
MergedOrthoGroup000507		Ct_CtTrNR00597	Dg_DgTrNR06864	Mt_Medtr4g101270
MergedOrthoGroup000508Sub001		Ct_CtTrNR00598,Ct_CtTrNR06409,Ct_CtTrNR06410,Ct_CtTrNR06412	Dg_DgTrNR13174	Mt_Medtr3g105980
MergedOrthoGroup000508Sub002		Ct_CtTrNR08280	Dg_DgTrNR02157	Mt_Medtr1g014040
MergedOrthoGroup000508Sub003		Ct_CtTrNR08390	Dg_DgTrNR11180	Mt_Medtr1g014070
MergedOrthoGroup000509Sub001		Ct_CtTrNR00599	Dg_DgTrNR13150	Mt_Medtr3g030550
MergedOrthoGroup000509Sub002		Ct_CtTrNR03362	Dg_DgTrNR10371	Mt_Medtr4g037495
MergedOrthoGroup000511Sub001		Ct_CtTrNR00601	Dg_DgTrNR13277	Mt_Medtr2g031960
MergedOrthoGroup000512Sub001		Ct_CtTrNR00918	Dg_DgTrNR02398	Mt_Medtr4g112540
MergedOrthoGroup000512Sub002		Ct_CtTrNR13732	Dg_DgTrNR00356	Mt_Medtr2g056120
MergedOrthoGroup000517		Ct_CtTrNR00613	Dg_DgTrNR05530	Mt_Medtr7g030030,Mt_Medtr7g038720,Mt_Medtr8g019500
MergedOrthoGroup000518		Ct_CtTrNR00615	Dg_DgTrNR02818	Mt_Medtr4g073530
MergedOrthoGroup000520		Ct_CtTrNR00617	Dg_DgTrNR01666	Mt_Medtr1g049070,Mt_Medtr1g069140,Mt_Medtr1g073000
MergedOrthoGroup000521		Ct_CtTrNR00618	Dg_DgTrNR10192,Dg_DgTrNR10481	Mt_Medtr1g018710,Mt_Medtr3g102500
MergedOrthoGroup000522		Ct_CtTrNR00619	Dg_DgTrNR05357	Mt_Medtr8g073305
MergedOrthoGroup000523		Ct_CtTrNR00620	Dg_DgTrNR02256	Mt_Medtr3g070230,Mt_Medtr5g082150
MergedOrthoGroup000524		Ct_CtTrNR00621	Dg_DgTrNR03863	Mt_Medtr8g027770,Mt_Medtr8g027775,Mt_Medtr8g027780
MergedOrthoGroup000531		Ct_CtTrNR00629	Dg_DgTrNR09521	Mt_Medtr4g102380
MergedOrthoGroup000532		Ct_CtTrNR00630	Dg_DgTrNR09517	Mt_Medtr1g073190
MergedOrthoGroup000533Sub001		Ct_CtTrNR00631	Dg_DgTrNR13067	Mt_Medtr1g107450
MergedOrthoGroup000534Sub001		Ct_CtTrNR00632,Ct_CtTrNR10790,Ct_CtTrNR10791	Dg_DgTrNR04282	Mt_Medtr0350s0010,Mt_Medtr7g009640,Mt_Medtr8g017630,Mt_Medtr8g018030
MergedOrthoGroup000535Sub001		Ct_CtTrNR04419,Ct_CtTrNR14299	Dg_DgTrNR04697,Dg_DgTrNR04698	Mt_Medtr5g010440,Mt_Medtr5g023810,Mt_Medtr8g098510
MergedOrthoGroup000535Sub002		Ct_CtTrNR10973	Dg_DgTrNR14869	Mt_Medtr8g074010
MergedOrthoGroup000536		Ct_CtTrNR00634	Dg_DgTrNR03630	Mt_Medtr1g107460
MergedOrthoGroup000539Sub001		Ct_CtTrNR01935	Dg_DgTrNR03969	Mt_Medtr0027s0180,Mt_Medtr0027s0200,Mt_Medtr7g059080
MergedOrthoGroup000542Sub001		Ct_CtTrNR00641	Dg_DgTrNR13822	Mt_Medtr1g048970
MergedOrthoGroup000544		Ct_CtTrNR00643	Dg_DgTrNR10793	Mt_Medtr4g100975
MergedOrthoGroup000545Sub001		Ct_CtTrNR00644	Dg_DgTrNR10352	Mt_Medtr8g076780
MergedOrthoGroup000545Sub002		Ct_CtTrNR00783	Dg_DgTrNR08507,Dg_DgTrNR08508	Mt_Medtr5g021060,Mt_Medtr8g076820
MergedOrthoGroup000545Sub003		Ct_CtTrNR04928	Dg_DgTrNR00375	Mt_Medtr8g076840
MergedOrthoGroup000546Sub001		Ct_CtTrNR00645	Dg_DgTrNR12812	Mt_Medtr4g100630
MergedOrthoGroup000546Sub002		Ct_CtTrNR01430	Dg_DgTrNR05228	Mt_Medtr2g021320
MergedOrthoGroup000546Sub003		Ct_CtTrNR05516	Dg_DgTrNR04428	Mt_Medtr4g100590,Mt_Medtr4g100600,Mt_Medtr4g100610
MergedOrthoGroup000547		Ct_CtTrNR00646	Dg_DgTrNR11486	Mt_Medtr0050s0180
MergedOrthoGroup000552		Ct_CtTrNR00653	Dg_DgTrNR09908	Mt_Medtr3g037570
MergedOrthoGroup000553Sub001		Ct_CtTrNR04099	Dg_DgTrNR02063	Mt_Medtr7g104270
MergedOrthoGroup000554Sub001		Ct_CtTrNR00655	Dg_DgTrNR10720	Mt_Medtr2g012533,Mt_Medtr2g012660,Mt_Medtr4g044663
MergedOrthoGroup000556		Ct_CtTrNR00657	Dg_DgTrNR00905	Mt_Medtr3g077120,Mt_Medtr3g077160
MergedOrthoGroup000558Sub001		Ct_CtTrNR00659	Dg_DgTrNR09766	Mt_Medtr5g021730
MergedOrthoGroup000558Sub002		Ct_CtTrNR12085,Ct_CtTrNR12086	Dg_DgTrNR08445	Mt_Medtr0022s0360,Mt_Medtr6g048060
MergedOrthoGroup000559		Ct_CtTrNR00660	Dg_DgTrNR11812,Dg_DgTrNR11869	Mt_Medtr1g013100,Mt_Medtr3g106250
MergedOrthoGroup000562		Ct_CtTrNR00663	Dg_DgTrNR00031	Mt_Medtr4g081710,Mt_Medtr5g041350
MergedOrthoGroup000563Sub001		Ct_CtTrNR01481	Dg_DgTrNR03748	Mt_Medtr2g029940
MergedOrthoGroup000563Sub002		Ct_CtTrNR02902	Dg_DgTrNR11558	Mt_Medtr2g029540
MergedOrthoGroup000563Sub003		Ct_CtTrNR08175	Dg_DgTrNR01718	Mt_Medtr2g029960
MergedOrthoGroup000568Sub001		Ct_CtTrNR00671	Dg_DgTrNR12754	Mt_Medtr7g106830,Mt_Medtr8g091280
MergedOrthoGroup000569		Ct_CtTrNR00672	Dg_DgTrNR14381	Mt_Medtr2g011640,Mt_Medtr4g091510
MergedOrthoGroup000570		Ct_CtTrNR00673	Dg_DgTrNR06691	Mt_Medtr1g064630
MergedOrthoGroup000571Sub001		Ct_CtTrNR00674	Dg_DgTrNR09082	Mt_Medtr8g105860
MergedOrthoGroup000573Sub001		Ct_CtTrNR00677	Dg_DgTrNR15256	Mt_Medtr2g028620
MergedOrthoGroup000573Sub002		Ct_CtTrNR05249	Dg_DgTrNR04592	Mt_Medtr8g091980
MergedOrthoGroup000574Sub001		Ct_CtTrNR00678	Dg_DgTrNR07699	Mt_Medtr3g104780
MergedOrthoGroup000575Sub001		Ct_CtTrNR00679	Dg_DgTrNR00065	Mt_Medtr3g461020
MergedOrthoGroup000576Sub001		Ct_CtTrNR00681	Dg_DgTrNR03608	Mt_Medtr7g117415,Mt_Medtr8g027520
MergedOrthoGroup000577Sub001		Ct_CtTrNR09010	Dg_DgTrNR06822	Mt_Medtr3g114130
MergedOrthoGroup000577Sub002		Ct_CtTrNR12335	Dg_DgTrNR12283	Mt_Medtr5g022670,Mt_Medtr8g075150
MergedOrthoGroup000577Sub003		Ct_CtTrNR13657	Dg_DgTrNR13089	Mt_Medtr8g023330
MergedOrthoGroup000578		Ct_CtTrNR00685	Dg_DgTrNR09883	Mt_Medtr2g007190
MergedOrthoGroup000579		Ct_CtTrNR00686	Dg_DgTrNR07829	Mt_Medtr4g086420
MergedOrthoGroup000580		Ct_CtTrNR00687	Dg_DgTrNR11967	Mt_Medtr3g117590,Mt_Medtr4g072110
MergedOrthoGroup000582		Ct_CtTrNR00689	Dg_DgTrNR07811,Dg_DgTrNR07812	Mt_Medtr4g079530
MergedOrthoGroup000585		Ct_CtTrNR00694	Dg_DgTrNR13512	Mt_Medtr1g019280
MergedOrthoGroup000586Sub001		Ct_CtTrNR00695	Dg_DgTrNR07980	Mt_Medtr3g094040,Mt_Medtr3g094060
MergedOrthoGroup000592		Ct_CtTrNR00704	Dg_DgTrNR10144	Mt_Medtr2g076340
MergedOrthoGroup000594		Ct_CtTrNR00706	Dg_DgTrNR04151	Mt_Medtr2g010510
MergedOrthoGroup000597Sub001		Ct_CtTrNR00709	Dg_DgTrNR12157	Mt_Medtr3g109720
MergedOrthoGroup000597Sub002		Ct_CtTrNR02181	Dg_DgTrNR13456	Mt_Medtr3g109700
MergedOrthoGroup000599		Ct_CtTrNR00711	Dg_DgTrNR02730	Mt_Medtr5g096260
MergedOrthoGroup000601		Ct_CtTrNR00713	Dg_DgTrNR07861	Mt_Medtr7g117910,Mt_Medtr8g027220
MergedOrthoGroup000605		Ct_CtTrNR00718	Dg_DgTrNR05224	Mt_Medtr3g087360,Mt_Medtr8g090265
MergedOrthoGroup000606		Ct_CtTrNR00719	Dg_DgTrNR10790,Dg_DgTrNR11690	Mt_Medtr3g074130,Mt_Medtr5g062700
MergedOrthoGroup000607		Ct_CtTrNR00720	Dg_DgTrNR00229	Mt_Medtr4g005410
MergedOrthoGroup000609		Ct_CtTrNR00723	Dg_DgTrNR00277	Mt_Medtr3g045720
MergedOrthoGroup000611Sub001		Ct_CtTrNR05600	Dg_DgTrNR03465	Mt_Medtr2g097890
MergedOrthoGroup000612		Ct_CtTrNR00726	Dg_DgTrNR09339	Mt_Medtr7g110600
MergedOrthoGroup000614		Ct_CtTrNR00728	Dg_DgTrNR07909	Mt_Medtr2g028480
MergedOrthoGroup000616Sub001		Ct_CtTrNR00733	Dg_DgTrNR12578	Mt_Medtr7g102130
MergedOrthoGroup000616Sub002		Ct_CtTrNR09907	Dg_DgTrNR04385,Dg_DgTrNR14180	Mt_Medtr7g102180
MergedOrthoGroup000617Sub001		Ct_CtTrNR00734	Dg_DgTrNR13814	Mt_Medtr5g097510
MergedOrthoGroup000617Sub002		Ct_CtTrNR09329	Dg_DgTrNR07752	Mt_Medtr0283s0050,Mt_Medtr5g097530
MergedOrthoGroup000620Sub001		Ct_CtTrNR02549	Dg_DgTrNR07327	Mt_Medtr4g111945
MergedOrthoGroup000620Sub002		Ct_CtTrNR09659	Dg_DgTrNR14298	Mt_Medtr4g111965
MergedOrthoGroup000621		Ct_CtTrNR00739	Dg_DgTrNR15250	Mt_Medtr1g087840,Mt_Medtr7g109135
MergedOrthoGroup000622Sub001		Ct_CtTrNR01058	Dg_DgTrNR07492	Mt_Medtr1g088260,Mt_Medtr7g108775
MergedOrthoGroup000622Sub002		Ct_CtTrNR02289	Dg_DgTrNR06856	Mt_Medtr8g023040
MergedOrthoGroup000622Sub003		Ct_CtTrNR05184	Dg_DgTrNR07775	Mt_Medtr7g108785
MergedOrthoGroup000623Sub001		Ct_CtTrNR00742	Dg_DgTrNR15292	Mt_Medtr4g106550
MergedOrthoGroup000623Sub002		Ct_CtTrNR02553	Dg_DgTrNR05320	Mt_Medtr3g078590
MergedOrthoGroup000625Sub001		Ct_CtTrNR00744	Dg_DgTrNR06641,Dg_DgTrNR06642	Mt_Medtr1g088825,Mt_Medtr1g088840,Mt_Medtr1g088845,Mt_Medtr1g492670
MergedOrthoGroup000625Sub002		Ct_CtTrNR07530	Dg_DgTrNR15124	Mt_Medtr1g088855,Mt_Medtr7g108520
MergedOrthoGroup000625Sub003		Ct_CtTrNR13506,Ct_CtTrNR13507	Dg_DgTrNR03740	Mt_Medtr2g014120,Mt_Medtr7g108540
MergedOrthoGroup000626		Ct_CtTrNR00745	Dg_DgTrNR09170	Mt_Medtr5g091250
MergedOrthoGroup000627Sub001		Ct_CtTrNR00746	Dg_DgTrNR14756	Mt_Medtr3g070390
MergedOrthoGroup000627Sub002		Ct_CtTrNR06476	Dg_DgTrNR01505,Dg_DgTrNR10801	Mt_Medtr3g070400
MergedOrthoGroup000629		Ct_CtTrNR00750	Dg_DgTrNR14588	Mt_Medtr4g101920,Mt_Medtr5g011420
MergedOrthoGroup000634		Ct_CtTrNR00758	Dg_DgTrNR05578	Mt_Medtr1g106855
MergedOrthoGroup000635		Ct_CtTrNR00759	Dg_DgTrNR14839	Mt_Medtr3g065440,Mt_Medtr5g078140
MergedOrthoGroup000636		Ct_CtTrNR00760	Dg_DgTrNR10771	Mt_Medtr5g095770
MergedOrthoGroup000640Sub001		Ct_CtTrNR13021	Dg_DgTrNR13484	Mt_Medtr7g005400
MergedOrthoGroup000641Sub001		Ct_CtTrNR00765,Ct_CtTrNR06416	Dg_DgTrNR01695,Dg_DgTrNR02584,Dg_DgTrNR02585	Mt_Medtr1g066800,Mt_Medtr1g066820,Mt_Medtr6g059930,Mt_Medtr7g100790
MergedOrthoGroup000643		Ct_CtTrNR00767	Dg_DgTrNR14724	Mt_Medtr8g015930
MergedOrthoGroup000644		Ct_CtTrNR00768	Dg_DgTrNR01828	Mt_Medtr2g019220
MergedOrthoGroup000646Sub001		Ct_CtTrNR00770	Dg_DgTrNR02764	Mt_Medtr5g007210
MergedOrthoGroup000646Sub002		Ct_CtTrNR06835	Dg_DgTrNR02044	Mt_Medtr5g005440
MergedOrthoGroup000646Sub003		Ct_CtTrNR12539	Dg_DgTrNR12765,Dg_DgTrNR12766	Mt_Medtr0001s0570,Mt_Medtr5g007180
MergedOrthoGroup000648		Ct_CtTrNR00773	Dg_DgTrNR10023,Dg_DgTrNR13176,Dg_DgTrNR15264,Dg_DgTrNR15265	Mt_Medtr4g102000
MergedOrthoGroup000650		Ct_CtTrNR00775	Dg_DgTrNR11067	Mt_Medtr5g023210
MergedOrthoGroup000653		Ct_CtTrNR00778	Dg_DgTrNR10974	Mt_Medtr1g109470
MergedOrthoGroup000656Sub001		Ct_CtTrNR00781	Dg_DgTrNR01935	Mt_Medtr3g112270,Mt_Medtr3g112280
MergedOrthoGroup000656Sub002		Ct_CtTrNR02582	Dg_DgTrNR01018	Mt_Medtr1g022940
MergedOrthoGroup000656Sub003		Ct_CtTrNR03054	Dg_DgTrNR01397	Mt_Medtr4g022920,Mt_Medtr6g463300
MergedOrthoGroup000656Sub004		Ct_CtTrNR03386	Dg_DgTrNR01969	Mt_Medtr4g011960
MergedOrthoGroup000657		Ct_CtTrNR00782	Dg_DgTrNR10996	Mt_Medtr2g089510
MergedOrthoGroup000659		Ct_CtTrNR00785	Dg_DgTrNR11515	Mt_Medtr1g101190
MergedOrthoGroup000662		Ct_CtTrNR00788	Dg_DgTrNR07777	Mt_Medtr3g106080
MergedOrthoGroup000663		Ct_CtTrNR00789	Dg_DgTrNR09698	Mt_Medtr4g100350
MergedOrthoGroup000664		Ct_CtTrNR00790	Dg_DgTrNR01319,Dg_DgTrNR06719	Mt_Medtr6g090070
MergedOrthoGroup000668		Ct_CtTrNR00795	Dg_DgTrNR13944,Dg_DgTrNR13945	Mt_Medtr3g070300,Mt_Medtr3g076760,Mt_Medtr5g082480
MergedOrthoGroup000673Sub001		Ct_CtTrNR00800	Dg_DgTrNR04598	Mt_Medtr5g019220,Mt_Medtr8g078240
MergedOrthoGroup000676		Ct_CtTrNR00803	Dg_DgTrNR09800	Mt_Medtr4g082310,Mt_Medtr5g042200
MergedOrthoGroup000677		Ct_CtTrNR00804	Dg_DgTrNR05666	Mt_Medtr1g050670
MergedOrthoGroup000678		Ct_CtTrNR00805	Dg_DgTrNR14043	Mt_Medtr3g083180
MergedOrthoGroup000679		Ct_CtTrNR00806	Dg_DgTrNR07588	Mt_Medtr5g015050
MergedOrthoGroup000680Sub001		Ct_CtTrNR00807	Dg_DgTrNR00750	Mt_Medtr3g096480,Mt_Medtr8g093880
MergedOrthoGroup000682Sub001		Ct_CtTrNR00809,Ct_CtTrNR05130,Ct_CtTrNR05691,Ct_CtTrNR13706,Ct_CtTrNR13707,Ct_CtTrNR13708,Ct_CtTrNR14812	Dg_DgTrNR08300	Mt_Medtr3g101900,Mt_Medtr3g101930,Mt_Medtr3g101960,Mt_Medtr3g101970,Mt_Medtr3g102010,Mt_Medtr3g102020,Mt_Medtr3g102030
MergedOrthoGroup000684Sub001		Ct_CtTrNR02280	Dg_DgTrNR13506	Mt_Medtr3g109450
MergedOrthoGroup000687		Ct_CtTrNR00815	Dg_DgTrNR04537	Mt_Medtr4g088585
MergedOrthoGroup000688Sub001		Ct_CtTrNR00816	Dg_DgTrNR02523	Mt_Medtr4g068940
MergedOrthoGroup000689		Ct_CtTrNR00817	Dg_DgTrNR10770,Dg_DgTrNR15024	Mt_Medtr7g052690
MergedOrthoGroup000690		Ct_CtTrNR00818	Dg_DgTrNR02132	Mt_Medtr1g090270,Mt_Medtr1g090280,Mt_Medtr4g059370
MergedOrthoGroup000691		Ct_CtTrNR00820	Dg_DgTrNR00557	Mt_Medtr8g024100
MergedOrthoGroup000692		Ct_CtTrNR00821	Dg_DgTrNR04627	Mt_Medtr3g088380
MergedOrthoGroup000693		Ct_CtTrNR00822	Dg_DgTrNR14453	Mt_Medtr5g026910
MergedOrthoGroup000694		Ct_CtTrNR00823	Dg_DgTrNR00528	Mt_Medtr3g113310,Mt_Medtr6g077850
MergedOrthoGroup000698		Ct_CtTrNR00828	Dg_DgTrNR09429	Mt_Medtr7g045280
MergedOrthoGroup000700		Ct_CtTrNR00830	Dg_DgTrNR11379	Mt_Medtr7g094980
MergedOrthoGroup000701Sub001		Ct_CtTrNR00831	Dg_DgTrNR05720	Mt_Medtr1g080390
MergedOrthoGroup000701Sub002		Ct_CtTrNR11367	Dg_DgTrNR07813	Mt_Medtr3g117270,Mt_Medtr3g117280
MergedOrthoGroup000704		Ct_CtTrNR00834	Dg_DgTrNR11058	Mt_Medtr2g029510
MergedOrthoGroup000705		Ct_CtTrNR00836	Dg_DgTrNR09358	Mt_Medtr2g012310,Mt_Medtr2g031710,Mt_Medtr5g027050
MergedOrthoGroup000707Sub001		Ct_CtTrNR00838	Dg_DgTrNR07566	Mt_Medtr1g100767
MergedOrthoGroup000709		Ct_CtTrNR00840	Dg_DgTrNR03988	Mt_Medtr7g019180
MergedOrthoGroup000711		Ct_CtTrNR00844	Dg_DgTrNR10441,Dg_DgTrNR11674	Mt_Medtr5g038280,Mt_Medtr8g469430
MergedOrthoGroup000714Sub001		Ct_CtTrNR12471	Dg_DgTrNR01832	Mt_Medtr5g019300
MergedOrthoGroup000716		Ct_CtTrNR00849	Dg_DgTrNR13477	Mt_Medtr2g012550,Mt_Medtr3g078800,Mt_Medtr3g078810,Mt_Medtr3g078820,Mt_Medtr5g087760
MergedOrthoGroup000719		Ct_CtTrNR00852	Dg_DgTrNR08658,Dg_DgTrNR08659,Dg_DgTrNR10250	Mt_Medtr2g072210
MergedOrthoGroup000720		Ct_CtTrNR00853	Dg_DgTrNR03472,Dg_DgTrNR08305	Mt_Medtr3g108010
MergedOrthoGroup000721Sub001		Ct_CtTrNR00854	Dg_DgTrNR01579	Mt_Medtr1g076690,Mt_Medtr6g061710
MergedOrthoGroup000723Sub001		Ct_CtTrNR00857	Dg_DgTrNR02943	Mt_Medtr8g039140
MergedOrthoGroup000724		Ct_CtTrNR00858	Dg_DgTrNR00839	Mt_Medtr1g067780,Mt_Medtr1g068630,Mt_Medtr1g068710,Mt_Medtr1g068720,Mt_Medtr7g100050
MergedOrthoGroup000725		Ct_CtTrNR00859,Ct_CtTrNR05932,Ct_CtTrNR11133	Dg_DgTrNR05960	Mt_Medtr3g103580
MergedOrthoGroup000727		Ct_CtTrNR00861	Dg_DgTrNR06419	Mt_Medtr1g026020
MergedOrthoGroup000729Sub001		Ct_CtTrNR00863	Dg_DgTrNR05393,Dg_DgTrNR14371	Mt_Medtr8g024320
MergedOrthoGroup000729Sub002		Ct_CtTrNR02973	Dg_DgTrNR09434,Dg_DgTrNR13412	Mt_Medtr1g028380,Mt_Medtr3g090980
MergedOrthoGroup000730		Ct_CtTrNR00864	Dg_DgTrNR09626	Mt_Medtr4g036110
MergedOrthoGroup000732		Ct_CtTrNR00866	Dg_DgTrNR11528	Mt_Medtr1g067560,Mt_Medtr7g100450
MergedOrthoGroup000733		Ct_CtTrNR00867	Dg_DgTrNR01409,Dg_DgTrNR01410	Mt_Medtr1g086790,Mt_Medtr7g109800
MergedOrthoGroup000734		Ct_CtTrNR00868	Dg_DgTrNR10332	Mt_Medtr8g089585
MergedOrthoGroup000736Sub001		Ct_CtTrNR02216	Dg_DgTrNR03049	Mt_Medtr5g081320,Mt_Medtr6g015190,Mt_Medtr6g015265
MergedOrthoGroup000737Sub001		Ct_CtTrNR04079	Dg_DgTrNR10284	Mt_Medtr7g110820
MergedOrthoGroup000737Sub002		Ct_CtTrNR13547	Dg_DgTrNR07508	Mt_Medtr4g063705
MergedOrthoGroup000738Sub001		Ct_CtTrNR01760	Dg_DgTrNR04546	Mt_Medtr8g054450
MergedOrthoGroup000739		Ct_CtTrNR00875	Dg_DgTrNR04016	Mt_Medtr0446s0010,Mt_Medtr4g133928
MergedOrthoGroup000740		Ct_CtTrNR00878	Dg_DgTrNR02333,Dg_DgTrNR08129	Mt_Medtr5g065930
MergedOrthoGroup000742		Ct_CtTrNR00882	Dg_DgTrNR06999	Mt_Medtr7g080390
MergedOrthoGroup000743		Ct_CtTrNR00883	Dg_DgTrNR06881	Mt_Medtr3g005520
MergedOrthoGroup000744		Ct_CtTrNR00884	Dg_DgTrNR10629	Mt_Medtr2g436020,Mt_Medtr2g436250,Mt_Medtr4g120160
MergedOrthoGroup000748		Ct_CtTrNR00888	Dg_DgTrNR09625	Mt_Medtr5g037600
MergedOrthoGroup000749Sub001		Ct_CtTrNR00889	Dg_DgTrNR12864	Mt_Medtr3g097170
MergedOrthoGroup000750Sub001		Ct_CtTrNR02353	Dg_DgTrNR15060	Mt_Medtr1g090717
MergedOrthoGroup000750Sub002		Ct_CtTrNR07298	Dg_DgTrNR02334	Mt_Medtr8g005980
MergedOrthoGroup000750Sub003		Ct_CtTrNR08556	Dg_DgTrNR13405	Mt_Medtr4g033850
MergedOrthoGroup000750Sub004		Ct_CtTrNR10486	Dg_DgTrNR12941	Mt_Medtr3g091140
MergedOrthoGroup000753Sub001		Ct_CtTrNR00894,Ct_CtTrNR13900	Dg_DgTrNR13568	Mt_Medtr2g103110,Mt_Medtr5g025480
MergedOrthoGroup000754		Ct_CtTrNR00895	Dg_DgTrNR10982	Mt_Medtr3g087760
MergedOrthoGroup000755		Ct_CtTrNR00896,Ct_CtTrNR04505,Ct_CtTrNR04506,Ct_CtTrNR15132	Dg_DgTrNR02035,Dg_DgTrNR09184	Mt_Medtr3g117380,Mt_Medtr4g071590,Mt_Medtr4g471590
MergedOrthoGroup000757		Ct_CtTrNR00899	Dg_DgTrNR13446	Mt_Medtr6g004010
MergedOrthoGroup000758		Ct_CtTrNR00900	Dg_DgTrNR02519	Mt_Medtr2g090740
MergedOrthoGroup000760Sub001		Ct_CtTrNR01060	Dg_DgTrNR10320	Mt_Medtr8g040150
MergedOrthoGroup000760Sub002		Ct_CtTrNR06629	Dg_DgTrNR11488	Mt_Medtr3g091610
MergedOrthoGroup000760Sub003		Ct_CtTrNR13302	Dg_DgTrNR04754	Mt_Medtr8g040120
MergedOrthoGroup000762		Ct_CtTrNR00906	Dg_DgTrNR07078	Mt_Medtr5g038560,Mt_Medtr8g468570
MergedOrthoGroup000763		Ct_CtTrNR00907	Dg_DgTrNR09168	Mt_Medtr4g057565
MergedOrthoGroup000764		Ct_CtTrNR00908	Dg_DgTrNR15380	Mt_Medtr8g031320
MergedOrthoGroup000766Sub001		Ct_CtTrNR00910	Dg_DgTrNR06047	Mt_Medtr3g465470
MergedOrthoGroup000768Sub001		Ct_CtTrNR00912	Dg_DgTrNR11764	Mt_Medtr2g046150
MergedOrthoGroup000768Sub002		Ct_CtTrNR03863	Dg_DgTrNR03957	Mt_Medtr2g018270
MergedOrthoGroup000768Sub003		Ct_CtTrNR06451	Dg_DgTrNR05988	Mt_Medtr0004s0330
MergedOrthoGroup000768Sub004		Ct_CtTrNR08734	Dg_DgTrNR04404	Mt_Medtr1g077840
MergedOrthoGroup000768Sub005		Ct_CtTrNR12049	Dg_DgTrNR04318	Mt_Medtr1g077890,Mt_Medtr3g080850
MergedOrthoGroup000769		Ct_CtTrNR00913	Dg_DgTrNR10006	Mt_Medtr3g111060
MergedOrthoGroup000770		Ct_CtTrNR00914	Dg_DgTrNR11787	Mt_Medtr2g086700,Mt_Medtr2g086730
MergedOrthoGroup000772Sub001		Ct_CtTrNR11597	Dg_DgTrNR03068	Mt_Medtr4g075690
MergedOrthoGroup000773		Ct_CtTrNR00917	Dg_DgTrNR10141	Mt_Medtr5g014290
MergedOrthoGroup000775		Ct_CtTrNR00920,Ct_CtTrNR12285	Dg_DgTrNR07310	Mt_Medtr4g050180
MergedOrthoGroup000776		Ct_CtTrNR00921	Dg_DgTrNR02253	Mt_Medtr3g085480,Mt_Medtr8g080490
MergedOrthoGroup000777Sub001		Ct_CtTrNR00922	Dg_DgTrNR09092	Mt_Medtr0197s0070,Mt_Medtr7g059040
MergedOrthoGroup000778		Ct_CtTrNR00923	Dg_DgTrNR13283	Mt_Medtr1g095110
MergedOrthoGroup000779		Ct_CtTrNR00924	Dg_DgTrNR09845	Mt_Medtr1g096880
MergedOrthoGroup000783		Ct_CtTrNR00928	Dg_DgTrNR10015	Mt_Medtr1527s0010,Mt_Medtr1717s0010,Mt_Medtr2g081250
MergedOrthoGroup000784		Ct_CtTrNR00929	Dg_DgTrNR03119	Mt_Medtr5g024270,Mt_Medtr8g073250
MergedOrthoGroup000785		Ct_CtTrNR00930,Ct_CtTrNR11032,Ct_CtTrNR12219	Dg_DgTrNR14030	Mt_Medtr1g085510,Mt_Medtr7g096940
MergedOrthoGroup000786		Ct_CtTrNR00931	Dg_DgTrNR09844,Dg_DgTrNR10253	Mt_Medtr1g105430,Mt_Medtr6g011440
MergedOrthoGroup000789Sub001		Ct_CtTrNR00935	Dg_DgTrNR03330,Dg_DgTrNR10664	Mt_Medtr1g041495,Mt_Medtr1g075700,Mt_Medtr1g075710
MergedOrthoGroup000792		Ct_CtTrNR00939	Dg_DgTrNR04805	Mt_Medtr2g018260
MergedOrthoGroup000794Sub001		Ct_CtTrNR01460	Dg_DgTrNR08145	Mt_Medtr6g071360
MergedOrthoGroup000796		Ct_CtTrNR00947	Dg_DgTrNR14348	Mt_Medtr7g117445
MergedOrthoGroup000797		Ct_CtTrNR00948	Dg_DgTrNR00692	Mt_Medtr4g095080
MergedOrthoGroup000798		Ct_CtTrNR00949	Dg_DgTrNR11342,Dg_DgTrNR13153	Mt_Medtr3g070880,Mt_Medtr5g082830
MergedOrthoGroup000800		Ct_CtTrNR00952	Dg_DgTrNR01394,Dg_DgTrNR02187	Mt_Medtr1g050538,Mt_Medtr1g094180
MergedOrthoGroup000802Sub001		Ct_CtTrNR14270	Dg_DgTrNR14152	Mt_Medtr3g118430
MergedOrthoGroup000805		Ct_CtTrNR00957	Dg_DgTrNR01399	Mt_Medtr1g101680,Mt_Medtr1g101750
MergedOrthoGroup000806Sub001		Ct_CtTrNR00958,Ct_CtTrNR09562	Dg_DgTrNR00170	Mt_Medtr3g091550
MergedOrthoGroup000806Sub002		Ct_CtTrNR03298,Ct_CtTrNR13330	Dg_DgTrNR00169,Dg_DgTrNR00171	Mt_Medtr1g008060
MergedOrthoGroup000807		Ct_CtTrNR00959	Dg_DgTrNR11568	Mt_Medtr1g021652,Mt_Medtr3g111530
MergedOrthoGroup000808		Ct_CtTrNR00961	Dg_DgTrNR10088,Dg_DgTrNR10502,Dg_DgTrNR11352	Mt_Medtr4g018850,Mt_Medtr4g018860,Mt_Medtr4g018880,Mt_Medtr7g066090,Mt_Medtr7g066110
MergedOrthoGroup000809		Ct_CtTrNR00962	Dg_DgTrNR00960	Mt_Medtr3g074210
MergedOrthoGroup000811		Ct_CtTrNR00964	Dg_DgTrNR02860	Mt_Medtr3g073670
MergedOrthoGroup000813Sub001		Ct_CtTrNR00966	Dg_DgTrNR01191	Mt_Medtr1g115220,Mt_Medtr8g018100
MergedOrthoGroup000813Sub002		Ct_CtTrNR01668	Dg_DgTrNR00087	Mt_Medtr2g039670,Mt_Medtr4g126040
MergedOrthoGroup000813Sub003		Ct_CtTrNR03078	Dg_DgTrNR06727	Mt_Medtr2g039680,Mt_Medtr2g039697,Mt_Medtr2g039700
MergedOrthoGroup000813Sub004		Ct_CtTrNR07773	Dg_DgTrNR06143	Mt_Medtr5g015280
MergedOrthoGroup000813Sub005		Ct_CtTrNR11215	Dg_DgTrNR05634,Dg_DgTrNR05635	Mt_Medtr1g104710
MergedOrthoGroup000814Sub001		Ct_CtTrNR00967	Dg_DgTrNR06548	Mt_Medtr6g003960
MergedOrthoGroup000814Sub002		Ct_CtTrNR02286	Dg_DgTrNR02794	Mt_Medtr1g082950
MergedOrthoGroup000814Sub003		Ct_CtTrNR04805	Dg_DgTrNR13282	Mt_Medtr7g113420
MergedOrthoGroup000814Sub004		Ct_CtTrNR06042	Dg_DgTrNR12150	Mt_Medtr0032s0080
MergedOrthoGroup000816		Ct_CtTrNR00970	Dg_DgTrNR10282,Dg_DgTrNR12559,Dg_DgTrNR15042	Mt_Medtr3g463450
MergedOrthoGroup000817		Ct_CtTrNR00971	Dg_DgTrNR06044	Mt_Medtr7g109600
MergedOrthoGroup000820		Ct_CtTrNR00974	Dg_DgTrNR02057	Mt_Medtr3g081480
MergedOrthoGroup000821		Ct_CtTrNR00975	Dg_DgTrNR00623,Dg_DgTrNR00624,Dg_DgTrNR00625	Mt_Medtr3g083620,Mt_Medtr4g025570
MergedOrthoGroup000824Sub001		Ct_CtTrNR00978	Dg_DgTrNR04006	Mt_Medtr5g078780,Mt_Medtr5g078810
MergedOrthoGroup000824Sub002		Ct_CtTrNR03588	Dg_DgTrNR06996,Dg_DgTrNR10600	Mt_Medtr1g116205,Mt_Medtr1g116210,Mt_Medtr7g006030
MergedOrthoGroup000826Sub001		Ct_CtTrNR08525	Dg_DgTrNR03029	Mt_Medtr3g092810
MergedOrthoGroup000829Sub001		Ct_CtTrNR00986	Dg_DgTrNR15401	Mt_Medtr5g070350
MergedOrthoGroup000831		Ct_CtTrNR00989	Dg_DgTrNR05532	Mt_Medtr4g085590
MergedOrthoGroup000835		Ct_CtTrNR00993	Dg_DgTrNR02052	Mt_Medtr1g067530
MergedOrthoGroup000838		Ct_CtTrNR00996	Dg_DgTrNR14595	Mt_Medtr1g094660
MergedOrthoGroup000841Sub001		Ct_CtTrNR01000	Dg_DgTrNR02123	Mt_Medtr2g462010
MergedOrthoGroup000843		Ct_CtTrNR01003	Dg_DgTrNR07417	Mt_Medtr1g071810,Mt_Medtr7g095160
MergedOrthoGroup000844Sub001		Ct_CtTrNR01005	Dg_DgTrNR03605	Mt_Medtr8g103470
MergedOrthoGroup000847		Ct_CtTrNR01009	Dg_DgTrNR05890	Mt_Medtr6g006900
MergedOrthoGroup000848		Ct_CtTrNR01011	Dg_DgTrNR12670	Mt_Medtr5g020630
MergedOrthoGroup000849Sub001		Ct_CtTrNR01012	Dg_DgTrNR00758,Dg_DgTrNR08647	Mt_Medtr5g034340,Mt_Medtr5g034360
MergedOrthoGroup000849Sub002		Ct_CtTrNR03178	Dg_DgTrNR02209	Mt_Medtr1g072740,Mt_Medtr4g102520
MergedOrthoGroup000849Sub003		Ct_CtTrNR04625	Dg_DgTrNR08797	Mt_Medtr8g064490
MergedOrthoGroup000850		Ct_CtTrNR01013	Dg_DgTrNR10920	Mt_Medtr4g017820,Mt_Medtr7g069640
MergedOrthoGroup000851Sub001		Ct_CtTrNR09742	Dg_DgTrNR08090,Dg_DgTrNR08092	Mt_Medtr3g085190
MergedOrthoGroup000852Sub001		Ct_CtTrNR01015	Dg_DgTrNR09826	Mt_Medtr8g106780
MergedOrthoGroup000852Sub002		Ct_CtTrNR01253	Dg_DgTrNR13631	Mt_Medtr8g106740
MergedOrthoGroup000853Sub001		Ct_CtTrNR01017	Dg_DgTrNR02810,Dg_DgTrNR03284	Mt_Medtr3g077490,Mt_Medtr4g105500
MergedOrthoGroup000853Sub002		Ct_CtTrNR01606	Dg_DgTrNR07070	Mt_Medtr3g077500
MergedOrthoGroup000853Sub003		Ct_CtTrNR11596	Dg_DgTrNR10042,Dg_DgTrNR12090	Mt_Medtr3g077440,Mt_Medtr3g077450
MergedOrthoGroup000854		Ct_CtTrNR01018	Dg_DgTrNR07227	Mt_Medtr1g019625,Mt_Medtr2g079670,Mt_Medtr7g059340
MergedOrthoGroup000855Sub001		Ct_CtTrNR01019	Dg_DgTrNR13849	Mt_Medtr6g092790,Mt_Medtr8g101550
MergedOrthoGroup000855Sub002		Ct_CtTrNR02702	Dg_DgTrNR03404	Mt_Medtr1g078380
MergedOrthoGroup000855Sub003		Ct_CtTrNR05457,Ct_CtTrNR12682	Dg_DgTrNR04463,Dg_DgTrNR13404	Mt_Medtr6g092820,Mt_Medtr6g092840,Mt_Medtr6g092940,Mt_Medtr7g079520
MergedOrthoGroup000857Sub001		Ct_CtTrNR01633	Dg_DgTrNR14155	Mt_Medtr2g028770
MergedOrthoGroup000857Sub002		Ct_CtTrNR01664	Dg_DgTrNR01182	Mt_Medtr5g019990
MergedOrthoGroup000857Sub003		Ct_CtTrNR11997,Ct_CtTrNR11998	Dg_DgTrNR15372	Mt_Medtr3g048270
MergedOrthoGroup000857Sub004		Ct_CtTrNR13037	Dg_DgTrNR04005	Mt_Medtr4g094580
MergedOrthoGroup000858		Ct_CtTrNR01025	Dg_DgTrNR12331	Mt_Medtr1g096460
MergedOrthoGroup000859Sub001		Ct_CtTrNR01026	Dg_DgTrNR03922	Mt_Medtr1g082400,Mt_Medtr2g093770
MergedOrthoGroup000859Sub002		Ct_CtTrNR09507	Dg_DgTrNR01277,Dg_DgTrNR01278	Mt_Medtr2g093750
MergedOrthoGroup000861Sub001		Ct_CtTrNR01028	Dg_DgTrNR01803	Mt_Medtr6g090520
MergedOrthoGroup000861Sub002		Ct_CtTrNR04701,Ct_CtTrNR13680	Dg_DgTrNR14330,Dg_DgTrNR14331	Mt_Medtr1g102950,Mt_Medtr7g101180,Mt_Medtr7g406970
MergedOrthoGroup000863		Ct_CtTrNR01031	Dg_DgTrNR07124	Mt_Medtr3g116830
MergedOrthoGroup000864Sub001		Ct_CtTrNR01032	Dg_DgTrNR04101	Mt_Medtr5g030290,Mt_Medtr5g030310,Mt_Medtr5g430430,Mt_Medtr5g430440
MergedOrthoGroup000868		Ct_CtTrNR01037	Dg_DgTrNR00770	Mt_Medtr5g024300,Mt_Medtr8g073340
MergedOrthoGroup000869		Ct_CtTrNR01038	Dg_DgTrNR11782	Mt_Medtr2g037460,Mt_Medtr2g037880,Mt_Medtr7g104810
MergedOrthoGroup000870		Ct_CtTrNR01039	Dg_DgTrNR11075,Dg_DgTrNR11143	Mt_Medtr2g050000,Mt_Medtr5g006840,Mt_Medtr5g012470
MergedOrthoGroup000871		Ct_CtTrNR01041	Dg_DgTrNR09115	Mt_Medtr3g096000
MergedOrthoGroup000873		Ct_CtTrNR01044	Dg_DgTrNR10289	Mt_Medtr4g039540
MergedOrthoGroup000876Sub001		Ct_CtTrNR01047,Ct_CtTrNR03566	Dg_DgTrNR06578,Dg_DgTrNR08625	Mt_Medtr3g086530,Mt_Medtr8g089660
MergedOrthoGroup000877		Ct_CtTrNR01048	Dg_DgTrNR01001	Mt_Medtr1g016980
MergedOrthoGroup000878		Ct_CtTrNR01049	Dg_DgTrNR00028	Mt_Medtr1g102720
MergedOrthoGroup000880		Ct_CtTrNR01051,Ct_CtTrNR03419	Dg_DgTrNR11403	Mt_Medtr6g023805,Mt_Medtr7g029290
MergedOrthoGroup000881Sub001		Ct_CtTrNR05445	Dg_DgTrNR07534	Mt_Medtr3g107520,Mt_Medtr7g084950
MergedOrthoGroup000882		Ct_CtTrNR01053	Dg_DgTrNR07770	Mt_Medtr4g108100
MergedOrthoGroup000884Sub001		Ct_CtTrNR04414	Dg_DgTrNR01971	Mt_Medtr2g097630,Mt_Medtr5g071380
MergedOrthoGroup000884Sub002		Ct_CtTrNR06605	Dg_DgTrNR12215	Mt_Medtr3g066060
MergedOrthoGroup000887		Ct_CtTrNR01059	Dg_DgTrNR11336	Mt_Medtr3g111780
MergedOrthoGroup000890Sub001		Ct_CtTrNR01063,Ct_CtTrNR01064	Dg_DgTrNR11158	Mt_Medtr2g086610,Mt_Medtr4g070600
MergedOrthoGroup000890Sub002		Ct_CtTrNR02605	Dg_DgTrNR11547	Mt_Medtr3g117040,Mt_Medtr6g015615
MergedOrthoGroup000892		Ct_CtTrNR01067	Dg_DgTrNR13397	Mt_Medtr5g018720,Mt_Medtr8g078790
MergedOrthoGroup000893		Ct_CtTrNR01068	Dg_DgTrNR03812	Mt_Medtr3g088605
MergedOrthoGroup000894		Ct_CtTrNR01070	Dg_DgTrNR09533	Mt_Medtr2g095700,Mt_Medtr2g095720
MergedOrthoGroup000895		Ct_CtTrNR01071	Dg_DgTrNR08832	Mt_Medtr7g104600
MergedOrthoGroup000898		Ct_CtTrNR01075	Dg_DgTrNR03480,Dg_DgTrNR03482	Mt_Medtr7g083720
MergedOrthoGroup000901Sub001		Ct_CtTrNR01078	Dg_DgTrNR11803	Mt_Medtr7g013160
MergedOrthoGroup000902Sub001		Ct_CtTrNR01080	Dg_DgTrNR06447	Mt_Medtr1g019490,Mt_Medtr3g101660,Mt_Medtr8g070840
MergedOrthoGroup000903Sub001		Ct_CtTrNR01083	Dg_DgTrNR15364	Mt_Medtr2g032130
MergedOrthoGroup000903Sub002		Ct_CtTrNR01328	Dg_DgTrNR11230	Mt_Medtr0097s0070,Mt_Medtr8g089300
MergedOrthoGroup000904		Ct_CtTrNR01084,Ct_CtTrNR09588	Dg_DgTrNR12006	Mt_Medtr2g080290
MergedOrthoGroup000905		Ct_CtTrNR01085	Dg_DgTrNR10205	Mt_Medtr1g022395,Mt_Medtr3g111970
MergedOrthoGroup000906		Ct_CtTrNR01086	Dg_DgTrNR13288	Mt_Medtr2g024330
MergedOrthoGroup000907		Ct_CtTrNR01089	Dg_DgTrNR14804	Mt_Medtr3g088510
MergedOrthoGroup000910		Ct_CtTrNR01093,Ct_CtTrNR11819	Dg_DgTrNR09271,Dg_DgTrNR09356	Mt_Medtr1g090450
MergedOrthoGroup000911		Ct_CtTrNR01094,Ct_CtTrNR02909	Dg_DgTrNR04922	Mt_Medtr4g081420
MergedOrthoGroup000912		Ct_CtTrNR01095	Dg_DgTrNR14416	Mt_Medtr6g086280
MergedOrthoGroup000913Sub001		Ct_CtTrNR01096	Dg_DgTrNR13336	Mt_Medtr3g071510,Mt_Medtr5g083110
MergedOrthoGroup000913Sub002		Ct_CtTrNR12021	Dg_DgTrNR08676,Dg_DgTrNR08677	Mt_Medtr1g084790,Mt_Medtr3g071480,Mt_Medtr5g098190
MergedOrthoGroup000914Sub001		Ct_CtTrNR01097	Dg_DgTrNR01482	Mt_Medtr3g116110
MergedOrthoGroup000915Sub001		Ct_CtTrNR01098	Dg_DgTrNR12902	Mt_Medtr7g084380
MergedOrthoGroup000915Sub002		Ct_CtTrNR05219	Dg_DgTrNR01963	Mt_Medtr6g033165
MergedOrthoGroup000916Sub001		Ct_CtTrNR01099	Dg_DgTrNR11395	Mt_Medtr4g114960
MergedOrthoGroup000917		Ct_CtTrNR01103	Dg_DgTrNR01063,Dg_DgTrNR02681,Dg_DgTrNR02912,Dg_DgTrNR11904,Dg_DgTrNR15010	Mt_Medtr7g075140
MergedOrthoGroup000918Sub001		Ct_CtTrNR01104	Dg_DgTrNR00983	Mt_Medtr1g112910
MergedOrthoGroup000918Sub002		Ct_CtTrNR02168	Dg_DgTrNR11359,Dg_DgTrNR14364,Dg_DgTrNR14365	Mt_Medtr1g112920
MergedOrthoGroup000920		Ct_CtTrNR01107	Dg_DgTrNR11770	Mt_Medtr3g463610,Mt_Medtr7g024760,Mt_Medtr7g024765,Mt_Medtr7g024780,Mt_Medtr7g114410
MergedOrthoGroup000923		Ct_CtTrNR01111	Dg_DgTrNR07919	Mt_Medtr4g097590,Mt_Medtr8g072340
MergedOrthoGroup000924Sub001		Ct_CtTrNR01112	Dg_DgTrNR00540	Mt_Medtr4g082315,Mt_Medtr5g042260,Mt_Medtr5g042270,Mt_Medtr5g042300,Mt_Medtr5g042320
MergedOrthoGroup000924Sub002		Ct_CtTrNR06356	Dg_DgTrNR02931,Dg_DgTrNR06712	Mt_Medtr1g077090,Mt_Medtr6g065070
MergedOrthoGroup000925		Ct_CtTrNR01113	Dg_DgTrNR09858,Dg_DgTrNR09859	Mt_Medtr5g018670,Mt_Medtr8g078870
MergedOrthoGroup000928		Ct_CtTrNR01117	Dg_DgTrNR09634	Mt_Medtr1g053130
MergedOrthoGroup000929		Ct_CtTrNR01119	Dg_DgTrNR10067	Mt_Medtr2g087880,Mt_Medtr4g050060
MergedOrthoGroup000931		Ct_CtTrNR01122	Dg_DgTrNR09919	Mt_Medtr1g101120,Mt_Medtr6g452730
MergedOrthoGroup000932		Ct_CtTrNR01123	Dg_DgTrNR06776	Mt_Medtr5g083810
MergedOrthoGroup000933		Ct_CtTrNR01124	Dg_DgTrNR05211,Dg_DgTrNR08941	Mt_Medtr5g010025,Mt_Medtr8g098850
MergedOrthoGroup000934		Ct_CtTrNR01125	Dg_DgTrNR14717	Mt_Medtr2g033020
MergedOrthoGroup000936Sub001		Ct_CtTrNR02255	Dg_DgTrNR07234	Mt_Medtr3g091920
MergedOrthoGroup000937Sub001		Ct_CtTrNR01128	Dg_DgTrNR11216	Mt_Medtr2g079610
MergedOrthoGroup000937Sub002		Ct_CtTrNR09668	Dg_DgTrNR05626	Mt_Medtr2g079590
MergedOrthoGroup000938		Ct_CtTrNR01129	Dg_DgTrNR00709	Mt_Medtr3g069590,Mt_Medtr5g081410
MergedOrthoGroup000939		Ct_CtTrNR01130	Dg_DgTrNR01772	Mt_Medtr2g089795,Mt_Medtr4g045980
MergedOrthoGroup000941Sub001		Ct_CtTrNR01132	Dg_DgTrNR01197	Mt_Medtr5g031870,Mt_Medtr8g068390
MergedOrthoGroup000943Sub001		Ct_CtTrNR01134	Dg_DgTrNR11813	Mt_Medtr2g011350
MergedOrthoGroup000943Sub002		Ct_CtTrNR01945	Dg_DgTrNR11300	Mt_Medtr1g112350,Mt_Medtr2g087000
MergedOrthoGroup000943Sub003		Ct_CtTrNR02455	Dg_DgTrNR13201	Mt_Medtr5g088990
MergedOrthoGroup000944Sub001		Ct_CtTrNR06910	Dg_DgTrNR09972	Mt_Medtr5g016320
MergedOrthoGroup000945		Ct_CtTrNR01136	Dg_DgTrNR05900	Mt_Medtr8g069450
MergedOrthoGroup000947Sub001		Ct_CtTrNR01138	Dg_DgTrNR00736	Mt_Medtr1g010290
MergedOrthoGroup000948		Ct_CtTrNR01139	Dg_DgTrNR04965	Mt_Medtr3g108160
MergedOrthoGroup000949		Ct_CtTrNR01143	Dg_DgTrNR14403	Mt_Medtr3g087920
MergedOrthoGroup000951		Ct_CtTrNR01145	Dg_DgTrNR00380	Mt_Medtr1g013450,Mt_Medtr3g105710
MergedOrthoGroup000952		Ct_CtTrNR01146	Dg_DgTrNR12139	Mt_Medtr5g029900
MergedOrthoGroup000953Sub001		Ct_CtTrNR01147	Dg_DgTrNR15079	Mt_Medtr1g034000
MergedOrthoGroup000953Sub002		Ct_CtTrNR03224	Dg_DgTrNR05356	Mt_Medtr2g094040,Mt_Medtr3g005790,Mt_Medtr3g005800
MergedOrthoGroup000955		Ct_CtTrNR01149	Dg_DgTrNR00958,Dg_DgTrNR06198	Mt_Medtr6g015980,Mt_Medtr7g016840
MergedOrthoGroup000956Sub001		Ct_CtTrNR12907	Dg_DgTrNR05107	Mt_Medtr2g072830
MergedOrthoGroup000960		Ct_CtTrNR01154	Dg_DgTrNR08017	Mt_Medtr3g118500
MergedOrthoGroup000961		Ct_CtTrNR01155	Dg_DgTrNR13989	Mt_Medtr3g116080
MergedOrthoGroup000963Sub001		Ct_CtTrNR01159	Dg_DgTrNR00385	Mt_Medtr1g040560
MergedOrthoGroup000963Sub002		Ct_CtTrNR06097	Dg_DgTrNR10739	Mt_Medtr7g088520
MergedOrthoGroup000963Sub003		Ct_CtTrNR08463	Dg_DgTrNR01438	Mt_Medtr8g094030
MergedOrthoGroup000964		Ct_CtTrNR01161	Dg_DgTrNR07349	Mt_Medtr2g078060
MergedOrthoGroup000965		Ct_CtTrNR01162	Dg_DgTrNR13035	Mt_Medtr1g110750
MergedOrthoGroup000966		Ct_CtTrNR01165	Dg_DgTrNR04042	Mt_Medtr7g075060
MergedOrthoGroup000967		Ct_CtTrNR01166	Dg_DgTrNR05163	Mt_Medtr6g060175
MergedOrthoGroup000968Sub001		Ct_CtTrNR11841	Dg_DgTrNR00545	Mt_Medtr3g113680,Mt_Medtr3g114060,Mt_Medtr7g109430
MergedOrthoGroup000970		Ct_CtTrNR01169	Dg_DgTrNR09147	Mt_Medtr0316s0010
MergedOrthoGroup000971Sub001		Ct_CtTrNR01170	Dg_DgTrNR08737	Mt_Medtr0024s0070,Mt_Medtr0024s0160
MergedOrthoGroup000973		Ct_CtTrNR01172	Dg_DgTrNR10757	Mt_Medtr1g015000,Mt_Medtr3g105330
MergedOrthoGroup000975		Ct_CtTrNR01174	Dg_DgTrNR13692	Mt_Medtr4g134620
MergedOrthoGroup000977		Ct_CtTrNR01176,Ct_CtTrNR04480	Dg_DgTrNR09652,Dg_DgTrNR10729	Mt_Medtr1g053970,Mt_Medtr5g010830,Mt_Medtr7g093140,Mt_Medtr7g093160,Mt_Medtr7g093170
MergedOrthoGroup000978		Ct_CtTrNR01177	Dg_DgTrNR11006	Mt_Medtr6g016665
MergedOrthoGroup000979		Ct_CtTrNR01178	Dg_DgTrNR07587	Mt_Medtr6g015260,Mt_Medtr6g015280
MergedOrthoGroup000981Sub001		Ct_CtTrNR09732	Dg_DgTrNR07209	Mt_Medtr1g018650
MergedOrthoGroup000982		Ct_CtTrNR01181	Dg_DgTrNR03893	Mt_Medtr2g078390
MergedOrthoGroup000983Sub001		Ct_CtTrNR01182	Dg_DgTrNR12501	Mt_Medtr7g106570
MergedOrthoGroup000983Sub002		Ct_CtTrNR11525	Dg_DgTrNR00200	Mt_Medtr2g088720,Mt_Medtr7g106580,Mt_Medtr7g106600
MergedOrthoGroup000984		Ct_CtTrNR01183	Dg_DgTrNR10402	Mt_Medtr4g109380
MergedOrthoGroup000985Sub001		Ct_CtTrNR10335	Dg_DgTrNR03543	Mt_Medtr3g034680,Mt_Medtr4g128930
MergedOrthoGroup000986Sub001		Ct_CtTrNR01185	Dg_DgTrNR05902	Mt_Medtr1g035720,Mt_Medtr4g074190
MergedOrthoGroup000986Sub002		Ct_CtTrNR05848	Dg_DgTrNR07668	Mt_Medtr4g074230
MergedOrthoGroup000986Sub003		Ct_CtTrNR11154	Dg_DgTrNR13061	Mt_Medtr4g074440
MergedOrthoGroup000989		Ct_CtTrNR01188	Dg_DgTrNR01542	Mt_Medtr0318s0020,Mt_Medtr6g461910
MergedOrthoGroup000991Sub001		Ct_CtTrNR01190	Dg_DgTrNR00702	Mt_Medtr4g103800
MergedOrthoGroup000993		Ct_CtTrNR01192	Dg_DgTrNR14475	Mt_Medtr2g098420,Mt_Medtr4g066010
MergedOrthoGroup000994		Ct_CtTrNR01193	Dg_DgTrNR00452	Mt_Medtr5g096970
MergedOrthoGroup000996Sub001		Ct_CtTrNR01195	Dg_DgTrNR06022,Dg_DgTrNR06023	Mt_Medtr3g069960,Mt_Medtr5g081630
MergedOrthoGroup000996Sub002		Ct_CtTrNR02986	Dg_DgTrNR12236	Mt_Medtr3g069910
MergedOrthoGroup000997Sub001		Ct_CtTrNR02684	Dg_DgTrNR05630	Mt_Medtr3g064040
MergedOrthoGroup000997Sub002		Ct_CtTrNR06537	Dg_DgTrNR15345	Mt_Medtr8g088640
MergedOrthoGroup000998		Ct_CtTrNR01199	Dg_DgTrNR10937	Mt_Medtr0004s0490,Mt_Medtr6g005610,Mt_Medtr6g005670
MergedOrthoGroup001000		Ct_CtTrNR01202	Dg_DgTrNR00629	Mt_Medtr4g119920
MergedOrthoGroup001001		Ct_CtTrNR01203	Dg_DgTrNR02306	Mt_Medtr5g015680
MergedOrthoGroup001003		Ct_CtTrNR01205	Dg_DgTrNR03360	Mt_Medtr7g057740
MergedOrthoGroup001006		Ct_CtTrNR01210	Dg_DgTrNR01900	Mt_Medtr1g029410
MergedOrthoGroup001007		Ct_CtTrNR01212	Dg_DgTrNR06131	Mt_Medtr7g108100
MergedOrthoGroup001008		Ct_CtTrNR01215	Dg_DgTrNR15136	Mt_Medtr7g114730,Mt_Medtr7g114750,Mt_Medtr8g098320
MergedOrthoGroup001011Sub001		Ct_CtTrNR01219,Ct_CtTrNR12781	Dg_DgTrNR04750	Mt_Medtr3g115040
MergedOrthoGroup001011Sub002		Ct_CtTrNR14395	Dg_DgTrNR02720,Dg_DgTrNR03069	Mt_Medtr1g026410,Mt_Medtr3g115050
MergedOrthoGroup001017		Ct_CtTrNR01226	Dg_DgTrNR09838	Mt_Medtr2g089100
MergedOrthoGroup001019Sub001		Ct_CtTrNR01230,Ct_CtTrNR01231	Dg_DgTrNR12458	Mt_Medtr3g098600,Mt_Medtr8g100180
MergedOrthoGroup001019Sub002		Ct_CtTrNR12428	Dg_DgTrNR03859	Mt_Medtr8g096190
MergedOrthoGroup001020		Ct_CtTrNR01232	Dg_DgTrNR12231	Mt_Medtr7g079200,Mt_Medtr8g028445
MergedOrthoGroup001022		Ct_CtTrNR01234	Dg_DgTrNR10393	Mt_Medtr2g016030
MergedOrthoGroup001023		Ct_CtTrNR01235	Dg_DgTrNR02903	Mt_Medtr5g095010
MergedOrthoGroup001024		Ct_CtTrNR01236	Dg_DgTrNR01743,Dg_DgTrNR08107	Mt_Medtr7g081220
MergedOrthoGroup001026		Ct_CtTrNR01239	Dg_DgTrNR01298	Mt_Medtr3g005810
MergedOrthoGroup001030		Ct_CtTrNR01243	Dg_DgTrNR11790	Mt_Medtr4g088850
MergedOrthoGroup001032		Ct_CtTrNR01245	Dg_DgTrNR05844	Mt_Medtr3g058990,Mt_Medtr3g059000
MergedOrthoGroup001033		Ct_CtTrNR01247	Dg_DgTrNR10003	Mt_Medtr1g106215
MergedOrthoGroup001035		Ct_CtTrNR01249	Dg_DgTrNR01385	Mt_Medtr3g005410
MergedOrthoGroup001039Sub001		Ct_CtTrNR01254	Dg_DgTrNR06455	Mt_Medtr1g107580,Mt_Medtr7g037020
MergedOrthoGroup001039Sub002		Ct_CtTrNR08789	Dg_DgTrNR01453	Mt_Medtr2g022950,Mt_Medtr4g131970
MergedOrthoGroup001040		Ct_CtTrNR01255,Ct_CtTrNR14753	Dg_DgTrNR03124	Mt_Medtr7g020950,Mt_Medtr7g118210
MergedOrthoGroup001041		Ct_CtTrNR01256	Dg_DgTrNR05813	Mt_Medtr1g017090,Mt_Medtr3g103590
MergedOrthoGroup001042		Ct_CtTrNR01258	Dg_DgTrNR12953	Mt_Medtr8g009670
MergedOrthoGroup001044		Ct_CtTrNR01260	Dg_DgTrNR14731	Mt_Medtr7g072350,Mt_Medtr7g100345
MergedOrthoGroup001045		Ct_CtTrNR01262	Dg_DgTrNR09126	Mt_Medtr4g100990,Mt_Medtr5g012490
MergedOrthoGroup001047Sub001		Ct_CtTrNR01264	Dg_DgTrNR07290,Dg_DgTrNR07291	Mt_Medtr1g102470
MergedOrthoGroup001047Sub002		Ct_CtTrNR10638	Dg_DgTrNR03860	Mt_Medtr0050s0160
MergedOrthoGroup001051		Ct_CtTrNR01268	Dg_DgTrNR10843	Mt_Medtr1g031790
MergedOrthoGroup001056		Ct_CtTrNR01273	Dg_DgTrNR00194	Mt_Medtr0155s0040,Mt_Medtr1g077000
MergedOrthoGroup001057Sub001		Ct_CtTrNR01274	Dg_DgTrNR10362	Mt_Medtr3g031370
MergedOrthoGroup001057Sub002		Ct_CtTrNR03665	Dg_DgTrNR13134	Mt_Medtr2g013430
MergedOrthoGroup001057Sub003		Ct_CtTrNR06270	Dg_DgTrNR10229	Mt_Medtr4g088905
MergedOrthoGroup001058		Ct_CtTrNR01275	Dg_DgTrNR13357	Mt_Medtr7g100820
MergedOrthoGroup001061		Ct_CtTrNR01278,Ct_CtTrNR01279	Dg_DgTrNR05855	Mt_Medtr1g047180
MergedOrthoGroup001062		Ct_CtTrNR01280	Dg_DgTrNR13494	Mt_Medtr8g096880
MergedOrthoGroup001063		Ct_CtTrNR01281	Dg_DgTrNR05782	Mt_Medtr2g012510,Mt_Medtr3g109970,Mt_Medtr4g090525
MergedOrthoGroup001064Sub001		Ct_CtTrNR01282	Dg_DgTrNR13324	Mt_Medtr7g076680
MergedOrthoGroup001064Sub002		Ct_CtTrNR10810	Dg_DgTrNR12490	Mt_Medtr7g076700,Mt_Medtr8g031550
MergedOrthoGroup001065Sub001		Ct_CtTrNR01283	Dg_DgTrNR04040	Mt_Medtr6g015395,Mt_Medtr7g091480,Mt_Medtr8g066550
MergedOrthoGroup001067		Ct_CtTrNR01285	Dg_DgTrNR06121	Mt_Medtr1g046210
MergedOrthoGroup001069		Ct_CtTrNR01291	Dg_DgTrNR03973	Mt_Medtr2g084555,Mt_Medtr4g056390
MergedOrthoGroup001070Sub001		Ct_CtTrNR01605	Dg_DgTrNR06142	Mt_Medtr1g048000,Mt_Medtr2g069050,Mt_Medtr2g069310
MergedOrthoGroup001071Sub001		Ct_CtTrNR01294	Dg_DgTrNR02917	Mt_Medtr2g012810
MergedOrthoGroup001071Sub002		Ct_CtTrNR06337	Dg_DgTrNR14989	Mt_Medtr7g099870,Mt_Medtr7g099890,Mt_Medtr7g099910
MergedOrthoGroup001072		Ct_CtTrNR01295	Dg_DgTrNR15323	Mt_Medtr0221s0020
MergedOrthoGroup001075Sub001		Ct_CtTrNR01298	Dg_DgTrNR00187	Mt_Medtr7g100230
MergedOrthoGroup001078Sub001		Ct_CtTrNR01304	Dg_DgTrNR14851	Mt_Medtr1g083740
MergedOrthoGroup001080Sub001		Ct_CtTrNR01306	Dg_DgTrNR13544	Mt_Medtr3g064610,Mt_Medtr4g021160,Mt_Medtr5g076830
MergedOrthoGroup001081		Ct_CtTrNR01307	Dg_DgTrNR13062	Mt_Medtr7g045370
MergedOrthoGroup001082		Ct_CtTrNR01309	Dg_DgTrNR04895	Mt_Medtr3g009270
MergedOrthoGroup001084Sub001		Ct_CtTrNR01311	Dg_DgTrNR11105	Mt_Medtr1g031150
MergedOrthoGroup001089		Ct_CtTrNR01317	Dg_DgTrNR02438	Mt_Medtr2g101270
MergedOrthoGroup001090Sub001		Ct_CtTrNR01318	Dg_DgTrNR15069	Mt_Medtr3g014120,Mt_Medtr6g003920,Mt_Medtr7g110030
MergedOrthoGroup001091		Ct_CtTrNR01319	Dg_DgTrNR01787	Mt_Medtr4g025690,Mt_Medtr4g025730
MergedOrthoGroup001093		Ct_CtTrNR01321	Dg_DgTrNR11069	Mt_Medtr1g094850
MergedOrthoGroup001096Sub001		Ct_CtTrNR03482	Dg_DgTrNR00950,Dg_DgTrNR05225	Mt_Medtr4g131160
MergedOrthoGroup001097		Ct_CtTrNR01325	Dg_DgTrNR05624	Mt_Medtr4g087160
MergedOrthoGroup001098		Ct_CtTrNR01326,Ct_CtTrNR14791	Dg_DgTrNR02010	Mt_Medtr1g108460
MergedOrthoGroup001103		Ct_CtTrNR01333	Dg_DgTrNR00969	Mt_Medtr1g060610
MergedOrthoGroup001104Sub001		Ct_CtTrNR02097	Dg_DgTrNR14682	Mt_Medtr6g087120,Mt_Medtr8g102980
MergedOrthoGroup001104Sub002		Ct_CtTrNR04201	Dg_DgTrNR00714,Dg_DgTrNR07250	Mt_Medtr3g450960,Mt_Medtr3g464760,Mt_Medtr8g102950
MergedOrthoGroup001106		Ct_CtTrNR01338	Dg_DgTrNR11874	Mt_Medtr6g008210
MergedOrthoGroup001108Sub001		Ct_CtTrNR01340	Dg_DgTrNR02739	Mt_Medtr1g102890
MergedOrthoGroup001108Sub002		Ct_CtTrNR02415	Dg_DgTrNR14760	Mt_Medtr1g102900
MergedOrthoGroup001110		Ct_CtTrNR01342	Dg_DgTrNR06501	Mt_Medtr1g018800
MergedOrthoGroup001112		Ct_CtTrNR01344	Dg_DgTrNR08235	Mt_Medtr2g019860,Mt_Medtr4g119100
MergedOrthoGroup001113		Ct_CtTrNR01345	Dg_DgTrNR06092	Mt_Medtr5g045000
MergedOrthoGroup001115Sub001		Ct_CtTrNR01347	Dg_DgTrNR08279	Mt_Medtr1g071430
MergedOrthoGroup001117Sub001		Ct_CtTrNR01349	Dg_DgTrNR01370	Mt_Medtr4g005140
MergedOrthoGroup001117Sub002		Ct_CtTrNR05754	Dg_DgTrNR14277	Mt_Medtr3g118200,Mt_Medtr5g099590
MergedOrthoGroup001117Sub003		Ct_CtTrNR06931	Dg_DgTrNR11675	Mt_Medtr3g118210
MergedOrthoGroup001120Sub001		Ct_CtTrNR04078	Dg_DgTrNR10940	Mt_Medtr1g112320
MergedOrthoGroup001120Sub002		Ct_CtTrNR11124	Dg_DgTrNR03096	Mt_Medtr1g112970,Mt_Medtr4g131820
MergedOrthoGroup001121Sub001		Ct_CtTrNR03589	Dg_DgTrNR08465,Dg_DgTrNR08466	Mt_Medtr5g040320
MergedOrthoGroup001122Sub001		Ct_CtTrNR01354	Dg_DgTrNR01450,Dg_DgTrNR05719	Mt_Medtr4g046033
MergedOrthoGroup001124Sub001		Ct_CtTrNR01356	Dg_DgTrNR10621	Mt_Medtr2g013140,Mt_Medtr4g088955
MergedOrthoGroup001124Sub002		Ct_CtTrNR10250	Dg_DgTrNR05375	Mt_Medtr2g013130
MergedOrthoGroup001125		Ct_CtTrNR01357	Dg_DgTrNR02107	Mt_Medtr5g082850
MergedOrthoGroup001127Sub001		Ct_CtTrNR01359	Dg_DgTrNR04419	Mt_Medtr5g085550,Mt_Medtr7g114200,Mt_Medtr8g105830
MergedOrthoGroup001127Sub002		Ct_CtTrNR08705	Dg_DgTrNR00746	Mt_Medtr3g051270
MergedOrthoGroup001127Sub003		Ct_CtTrNR09290	Dg_DgTrNR06937,Dg_DgTrNR13031,Dg_DgTrNR13032	Mt_Medtr2g099480,Mt_Medtr8g019560
MergedOrthoGroup001127Sub004		Ct_CtTrNR11489	Dg_DgTrNR13076	Mt_Medtr4g037745
MergedOrthoGroup001128		Ct_CtTrNR01360	Dg_DgTrNR02495	Mt_Medtr2g086580,Mt_Medtr4g052850,Mt_Medtr5g064420
MergedOrthoGroup001130		Ct_CtTrNR01362	Dg_DgTrNR08989,Dg_DgTrNR11123	Mt_Medtr4g103580
MergedOrthoGroup001131		Ct_CtTrNR01363	Dg_DgTrNR05779,Dg_DgTrNR05780	Mt_Medtr5g038900
MergedOrthoGroup001132Sub001		Ct_CtTrNR01364	Dg_DgTrNR02001	Mt_Medtr1g078210
MergedOrthoGroup001134		Ct_CtTrNR01368	Dg_DgTrNR14600	Mt_Medtr6g016380
MergedOrthoGroup001136Sub001		Ct_CtTrNR01371	Dg_DgTrNR01458	Mt_Medtr1g114620,Mt_Medtr5g008660
MergedOrthoGroup001136Sub002		Ct_CtTrNR12661	Dg_DgTrNR09789	Mt_Medtr7g084610
MergedOrthoGroup001137Sub001		Ct_CtTrNR01372	Dg_DgTrNR12505	Mt_Medtr3g096760,Mt_Medtr5g018590
MergedOrthoGroup001137Sub002		Ct_CtTrNR03330	Dg_DgTrNR07130	Mt_Medtr5g018580
MergedOrthoGroup001140		Ct_CtTrNR01376	Dg_DgTrNR11923	Mt_Medtr3g070800,Mt_Medtr5g082630
MergedOrthoGroup001142		Ct_CtTrNR01378	Dg_DgTrNR06511	Mt_Medtr1g088870
MergedOrthoGroup001143		Ct_CtTrNR01380	Dg_DgTrNR01212	Mt_Medtr3g465570
MergedOrthoGroup001145		Ct_CtTrNR01384	Dg_DgTrNR09284	Mt_Medtr1g040875,Mt_Medtr1g076370
MergedOrthoGroup001147Sub001		Ct_CtTrNR01386	Dg_DgTrNR09004,Dg_DgTrNR12051	Mt_Medtr4g134640
MergedOrthoGroup001148Sub001		Ct_CtTrNR10561	Dg_DgTrNR07724	Mt_Medtr4g078760
MergedOrthoGroup001148Sub002		Ct_CtTrNR11206	Dg_DgTrNR03646	Mt_Medtr2g009750,Mt_Medtr4g093170
MergedOrthoGroup001149		Ct_CtTrNR01389	Dg_DgTrNR05537	Mt_Medtr4g011190
MergedOrthoGroup001151		Ct_CtTrNR01391	Dg_DgTrNR15066	Mt_Medtr2g103950,Mt_Medtr4g010110
MergedOrthoGroup001152		Ct_CtTrNR01392	Dg_DgTrNR02069	Mt_Medtr4g071070
MergedOrthoGroup001156		Ct_CtTrNR01397	Dg_DgTrNR05561,Dg_DgTrNR05562	Mt_Medtr1g112870,Mt_Medtr7g081010
MergedOrthoGroup001157Sub001		Ct_CtTrNR01398	Dg_DgTrNR10570	Mt_Medtr1g114610,Mt_Medtr7g010500
MergedOrthoGroup001158		Ct_CtTrNR01399,Ct_CtTrNR04062	Dg_DgTrNR06201,Dg_DgTrNR14680	Mt_Medtr1g105415,Mt_Medtr4g094598
MergedOrthoGroup001159		Ct_CtTrNR01400	Dg_DgTrNR13471	Mt_Medtr7g017500
MergedOrthoGroup001162		Ct_CtTrNR01403	Dg_DgTrNR09302	Mt_Medtr4g097160
MergedOrthoGroup001163		Ct_CtTrNR01404	Dg_DgTrNR11137	Mt_Medtr5g040430
MergedOrthoGroup001164		Ct_CtTrNR01405	Dg_DgTrNR10686	Mt_Medtr3g460760
MergedOrthoGroup001165		Ct_CtTrNR01406	Dg_DgTrNR01804	Mt_Medtr1g045120,Mt_Medtr1g073610
MergedOrthoGroup001166		Ct_CtTrNR01408	Dg_DgTrNR11733	Mt_Medtr2g078030,Mt_Medtr8g463930
MergedOrthoGroup001167		Ct_CtTrNR01409	Dg_DgTrNR05291	Mt_Medtr1g105085,Mt_Medtr2g079850,Mt_Medtr6g009120,Mt_Medtr6g464960,Mt_Medtr6g466340,Mt_Medtr7g105760,Mt_Medtr8g107170
MergedOrthoGroup001168		Ct_CtTrNR01410	Dg_DgTrNR11327,Dg_DgTrNR12213,Dg_DgTrNR14318	Mt_Medtr6g085170
MergedOrthoGroup001169		Ct_CtTrNR01411	Dg_DgTrNR13626	Mt_Medtr7g115250
MergedOrthoGroup001174		Ct_CtTrNR01416	Dg_DgTrNR07576	Mt_Medtr3g085290
MergedOrthoGroup001176		Ct_CtTrNR01418	Dg_DgTrNR15023	Mt_Medtr4g094252
MergedOrthoGroup001179		Ct_CtTrNR01424	Dg_DgTrNR03716	Mt_Medtr2g055760
MergedOrthoGroup001180		Ct_CtTrNR01425	Dg_DgTrNR08650	Mt_Medtr3g095040,Mt_Medtr8g092010
MergedOrthoGroup001181		Ct_CtTrNR01426	Dg_DgTrNR02192	Mt_Medtr1g030430
MergedOrthoGroup001182		Ct_CtTrNR01427	Dg_DgTrNR13553	Mt_Medtr6g034515
MergedOrthoGroup001184		Ct_CtTrNR01429	Dg_DgTrNR06795,Dg_DgTrNR06796	Mt_Medtr4g063800
MergedOrthoGroup001187		Ct_CtTrNR01433	Dg_DgTrNR07801	Mt_Medtr1g033880
MergedOrthoGroup001193		Ct_CtTrNR01443	Dg_DgTrNR13673	Mt_Medtr1g109620
MergedOrthoGroup001195		Ct_CtTrNR01446	Dg_DgTrNR10181,Dg_DgTrNR10578	Mt_Medtr1g087040,Mt_Medtr7g109510
MergedOrthoGroup001196		Ct_CtTrNR01447	Dg_DgTrNR10193,Dg_DgTrNR10194,Dg_DgTrNR10873	Mt_Medtr2g437700
MergedOrthoGroup001198Sub001		Ct_CtTrNR01450	Dg_DgTrNR07773	Mt_Medtr5g022390,Mt_Medtr8g075420
MergedOrthoGroup001199		Ct_CtTrNR01451	Dg_DgTrNR13743	Mt_Medtr5g011990
MergedOrthoGroup001200		Ct_CtTrNR01452,Ct_CtTrNR13750	Dg_DgTrNR15212	Mt_Medtr3g435170,Mt_Medtr3g435200,Mt_Medtr3g435230,Mt_Medtr3g435250
MergedOrthoGroup001201Sub001		Ct_CtTrNR08073	Dg_DgTrNR10397	Mt_Medtr2g031560,Mt_Medtr2g031590,Mt_Medtr2g031600
MergedOrthoGroup001201Sub002		Ct_CtTrNR08412	Dg_DgTrNR03259	Mt_Medtr2g031490,Mt_Medtr2g031510,Mt_Medtr4g094515
MergedOrthoGroup001201Sub003		Ct_CtTrNR08774	Dg_DgTrNR10168	Mt_Medtr5g026840
MergedOrthoGroup001202Sub001		Ct_CtTrNR01455	Dg_DgTrNR01615	Mt_Medtr8g100075
MergedOrthoGroup001202Sub002		Ct_CtTrNR07664	Dg_DgTrNR12652	Mt_Medtr1g116510
MergedOrthoGroup001204		Ct_CtTrNR01458	Dg_DgTrNR05535	Mt_Medtr5g017160
MergedOrthoGroup001205Sub001		Ct_CtTrNR01459	Dg_DgTrNR15444	Mt_Medtr5g098250
MergedOrthoGroup001205Sub002		Ct_CtTrNR02712	Dg_DgTrNR02832	Mt_Medtr3g060220,Mt_Medtr3g060240,Mt_Medtr3g060280
MergedOrthoGroup001205Sub003		Ct_CtTrNR11098	Dg_DgTrNR00226,Dg_DgTrNR07317	Mt_Medtr7g085820,Mt_Medtr7g098920
MergedOrthoGroup001207		Ct_CtTrNR01463	Dg_DgTrNR07555	Mt_Medtr5g026860
MergedOrthoGroup001208		Ct_CtTrNR01464	Dg_DgTrNR03046	Mt_Medtr7g010580
MergedOrthoGroup001209Sub001		Ct_CtTrNR09617	Dg_DgTrNR05721	Mt_Medtr4g114620
MergedOrthoGroup001212		Ct_CtTrNR01469	Dg_DgTrNR00919,Dg_DgTrNR14598	Mt_Medtr6g018490,Mt_Medtr6g025610,Mt_Medtr7g007260
MergedOrthoGroup001214		Ct_CtTrNR01471	Dg_DgTrNR09427	Mt_Medtr7g027020
MergedOrthoGroup001215		Ct_CtTrNR01472	Dg_DgTrNR02682,Dg_DgTrNR12004,Dg_DgTrNR12005	Mt_Medtr2g080220
MergedOrthoGroup001216		Ct_CtTrNR01473	Dg_DgTrNR11961	Mt_Medtr5g017890
MergedOrthoGroup001218		Ct_CtTrNR01475	Dg_DgTrNR02618,Dg_DgTrNR02853	Mt_Medtr3g466200,Mt_Medtr5g074970
MergedOrthoGroup001219Sub001		Ct_CtTrNR01476	Dg_DgTrNR09954	Mt_Medtr1g043240,Mt_Medtr1g074880
MergedOrthoGroup001222		Ct_CtTrNR01479	Dg_DgTrNR00610	Mt_Medtr2g016180,Mt_Medtr2g016270,Mt_Medtr2g016380
MergedOrthoGroup001223Sub001		Ct_CtTrNR04919	Dg_DgTrNR02019	Mt_Medtr5g071540
MergedOrthoGroup001225		Ct_CtTrNR01484	Dg_DgTrNR03225	Mt_Medtr4g069240
MergedOrthoGroup001227Sub001		Ct_CtTrNR01486	Dg_DgTrNR04803	Mt_Medtr3g082850
MergedOrthoGroup001227Sub002		Ct_CtTrNR06294	Dg_DgTrNR04733	Mt_Medtr3g089010
MergedOrthoGroup001228		Ct_CtTrNR01487,Ct_CtTrNR14639	Dg_DgTrNR14482	Mt_Medtr7g077410
MergedOrthoGroup001230Sub001		Ct_CtTrNR01489	Dg_DgTrNR12212	Mt_Medtr4g068950
MergedOrthoGroup001231		Ct_CtTrNR01490	Dg_DgTrNR05336	Mt_Medtr1g009750
MergedOrthoGroup001232		Ct_CtTrNR01491	Dg_DgTrNR07181	Mt_Medtr1g029000
MergedOrthoGroup001233Sub001		Ct_CtTrNR01492	Dg_DgTrNR06656	Mt_Medtr0022s0300,Mt_Medtr1g100747
MergedOrthoGroup001234		Ct_CtTrNR01493	Dg_DgTrNR06730,Dg_DgTrNR12137	Mt_Medtr2g097740
MergedOrthoGroup001238		Ct_CtTrNR01497	Dg_DgTrNR07392,Dg_DgTrNR08397	Mt_Medtr3g087230,Mt_Medtr8g090235
MergedOrthoGroup001239		Ct_CtTrNR01499	Dg_DgTrNR10494	Mt_Medtr2g096850
MergedOrthoGroup001240		Ct_CtTrNR01500,Ct_CtTrNR02782,Ct_CtTrNR14443,Ct_CtTrNR14444	Dg_DgTrNR05265	Mt_Medtr4g029500
MergedOrthoGroup001242Sub001		Ct_CtTrNR01503	Dg_DgTrNR03213	Mt_Medtr5g081850,Mt_Medtr7g074130
MergedOrthoGroup001242Sub002		Ct_CtTrNR02287	Dg_DgTrNR09037,Dg_DgTrNR09248	Mt_Medtr3g026110
MergedOrthoGroup001242Sub003		Ct_CtTrNR03112,Ct_CtTrNR06122	Dg_DgTrNR03765	Mt_Medtr4g106370,Mt_Medtr4g106810
MergedOrthoGroup001242Sub004		Ct_CtTrNR07976	Dg_DgTrNR05893	Mt_Medtr1g092920
MergedOrthoGroup001242Sub005		Ct_CtTrNR12856	Dg_DgTrNR05932	Mt_Medtr2g060650,Mt_Medtr2g061440
MergedOrthoGroup001243		Ct_CtTrNR01504	Dg_DgTrNR09506	Mt_Medtr3g012440
MergedOrthoGroup001244		Ct_CtTrNR01506	Dg_DgTrNR14825	Mt_Medtr1g064710
MergedOrthoGroup001245		Ct_CtTrNR01507,Ct_CtTrNR02091	Dg_DgTrNR13367	Mt_Medtr2g020850,Mt_Medtr4g118470,Mt_Medtr4g118480
MergedOrthoGroup001248Sub001		Ct_CtTrNR01510,Ct_CtTrNR07709,Ct_CtTrNR08587	Dg_DgTrNR00662,Dg_DgTrNR07561	Mt_Medtr2g084280,Mt_Medtr4g057270
MergedOrthoGroup001248Sub002		Ct_CtTrNR08072	Dg_DgTrNR01382	Mt_Medtr3g449790
MergedOrthoGroup001248Sub003		Ct_CtTrNR08751	Dg_DgTrNR04685,Dg_DgTrNR08229	Mt_Medtr1g019200
MergedOrthoGroup001251		Ct_CtTrNR01514,Ct_CtTrNR14734,Ct_CtTrNR14735	Dg_DgTrNR11641	Mt_Medtr2g034250,Mt_Medtr2g034260,Mt_Medtr2g034280
MergedOrthoGroup001254		Ct_CtTrNR01518	Dg_DgTrNR04984,Dg_DgTrNR09758	Mt_Medtr0004s0130,Mt_Medtr2g090360,Mt_Medtr2g090365
MergedOrthoGroup001256		Ct_CtTrNR01521	Dg_DgTrNR03359	Mt_Medtr5g029260
MergedOrthoGroup001259		Ct_CtTrNR01524	Dg_DgTrNR05088	Mt_Medtr1g105970
MergedOrthoGroup001261		Ct_CtTrNR01526	Dg_DgTrNR09899	Mt_Medtr8g102770
MergedOrthoGroup001263Sub001		Ct_CtTrNR02681	Dg_DgTrNR10467	Mt_Medtr1g098650
MergedOrthoGroup001263Sub002		Ct_CtTrNR13164	Dg_DgTrNR08140	Mt_Medtr1g098640
MergedOrthoGroup001264Sub001		Ct_CtTrNR01709	Dg_DgTrNR14681	Mt_Medtr1g035260
MergedOrthoGroup001265		Ct_CtTrNR01530	Dg_DgTrNR00581	Mt_Medtr6g461650
MergedOrthoGroup001266		Ct_CtTrNR01531	Dg_DgTrNR10412	Mt_Medtr5g094140
MergedOrthoGroup001267		Ct_CtTrNR01532	Dg_DgTrNR05461	Mt_Medtr1g059290
MergedOrthoGroup001268		Ct_CtTrNR01533	Dg_DgTrNR08448	Mt_Medtr4g129730
MergedOrthoGroup001269		Ct_CtTrNR01534	Dg_DgTrNR03173	Mt_Medtr2g064300,Mt_Medtr7g053520
MergedOrthoGroup001270		Ct_CtTrNR01535,Ct_CtTrNR14787,Ct_CtTrNR14788	Dg_DgTrNR09920,Dg_DgTrNR09921	Mt_Medtr1g026310,Mt_Medtr1g026350,Mt_Medtr1g026430,Mt_Medtr1g026470,Mt_Medtr8g039720
MergedOrthoGroup001271Sub001		Ct_CtTrNR01536	Dg_DgTrNR08464	Mt_Medtr7g105250
MergedOrthoGroup001273		Ct_CtTrNR01538	Dg_DgTrNR09387	Mt_Medtr7g090220
MergedOrthoGroup001276		Ct_CtTrNR01541	Dg_DgTrNR11220,Dg_DgTrNR11221	Mt_Medtr6g034205
MergedOrthoGroup001277Sub001		Ct_CtTrNR01542	Dg_DgTrNR08265	Mt_Medtr2g088820
MergedOrthoGroup001278		Ct_CtTrNR01543	Dg_DgTrNR04864	Mt_Medtr5g043680
MergedOrthoGroup001280		Ct_CtTrNR01545	Dg_DgTrNR06260	Mt_Medtr6g007797
MergedOrthoGroup001281		Ct_CtTrNR01546	Dg_DgTrNR15164	Mt_Medtr1g072250
MergedOrthoGroup001284		Ct_CtTrNR01549	Dg_DgTrNR10009	Mt_Medtr8g083140
MergedOrthoGroup001285		Ct_CtTrNR01552	Dg_DgTrNR03438	Mt_Medtr3g069190
MergedOrthoGroup001286		Ct_CtTrNR01553	Dg_DgTrNR03669	Mt_Medtr1g033480
MergedOrthoGroup001287		Ct_CtTrNR01554	Dg_DgTrNR12022	Mt_Medtr4g094622
MergedOrthoGroup001289		Ct_CtTrNR01556	Dg_DgTrNR04719	Mt_Medtr1g064300,Mt_Medtr1g442820,Mt_Medtr1g442830
MergedOrthoGroup001290Sub001		Ct_CtTrNR01557	Dg_DgTrNR06866	Mt_Medtr3g098780
MergedOrthoGroup001290Sub002		Ct_CtTrNR04368,Ct_CtTrNR14989,Ct_CtTrNR14990	Dg_DgTrNR07243,Dg_DgTrNR07244	Mt_Medtr1g102570,Mt_Medtr1g102780,Mt_Medtr1g102800,Mt_Medtr1g102810,Mt_Medtr1g102830
MergedOrthoGroup001294		Ct_CtTrNR01562	Dg_DgTrNR00289	Mt_Medtr8g068855
MergedOrthoGroup001295		Ct_CtTrNR01563	Dg_DgTrNR00876,Dg_DgTrNR15185	Mt_Medtr2g045135,Mt_Medtr2g045140,Mt_Medtr3g099300
MergedOrthoGroup001299		Ct_CtTrNR01568	Dg_DgTrNR04747	Mt_Medtr2g060550,Mt_Medtr7g051960,Mt_Medtr7g051967
MergedOrthoGroup001300		Ct_CtTrNR01569	Dg_DgTrNR03165	Mt_Medtr8g098490
MergedOrthoGroup001301		Ct_CtTrNR01570	Dg_DgTrNR14054	Mt_Medtr6g023885
MergedOrthoGroup001302Sub001		Ct_CtTrNR01571	Dg_DgTrNR13764	Mt_Medtr1493s0010,Mt_Medtr8g469540,Mt_Medtr8g469630,Mt_Medtr8g469750,Mt_Medtr8g470940
MergedOrthoGroup001303		Ct_CtTrNR01572	Dg_DgTrNR04961	Mt_Medtr7g056183,Mt_Medtr7g066710
MergedOrthoGroup001307		Ct_CtTrNR01576	Dg_DgTrNR10435	Mt_Medtr1g012440,Mt_Medtr3g107393
MergedOrthoGroup001308		Ct_CtTrNR01577	Dg_DgTrNR10846,Dg_DgTrNR11259	Mt_Medtr2g062600
MergedOrthoGroup001309Sub001		Ct_CtTrNR01578	Dg_DgTrNR07817	Mt_Medtr5g004680
MergedOrthoGroup001309Sub002		Ct_CtTrNR03328	Dg_DgTrNR15153	Mt_Medtr8g027425
MergedOrthoGroup001309Sub003		Ct_CtTrNR04228	Dg_DgTrNR04045,Dg_DgTrNR05294	Mt_Medtr7g117715,Mt_Medtr8g027430
MergedOrthoGroup001310		Ct_CtTrNR01579	Dg_DgTrNR09993	Mt_Medtr2g046810,Mt_Medtr3g086230,Mt_Medtr8g089610
MergedOrthoGroup001311		Ct_CtTrNR01580	Dg_DgTrNR03743	Mt_Medtr8g094730
MergedOrthoGroup001312		Ct_CtTrNR01581	Dg_DgTrNR03309	Mt_Medtr0011s0320,Mt_Medtr0662s0010,Mt_Medtr4g114360
MergedOrthoGroup001315		Ct_CtTrNR01585	Dg_DgTrNR02232,Dg_DgTrNR11461	Mt_Medtr2g013690,Mt_Medtr4g088785
MergedOrthoGroup001316Sub001		Ct_CtTrNR01586	Dg_DgTrNR08865	Mt_Medtr7g083790
MergedOrthoGroup001319		Ct_CtTrNR01590	Dg_DgTrNR11698	Mt_Medtr7g086360
MergedOrthoGroup001321Sub001		Ct_CtTrNR01593	Dg_DgTrNR05587	Mt_Medtr1g024155,Mt_Medtr1g024820,Mt_Medtr8g092520
MergedOrthoGroup001322Sub001		Ct_CtTrNR01594	Dg_DgTrNR09854	Mt_Medtr5g047140
MergedOrthoGroup001326Sub001		Ct_CtTrNR01598	Dg_DgTrNR14517	Mt_Medtr7g078990
MergedOrthoGroup001326Sub002		Ct_CtTrNR04322	Dg_DgTrNR06569	Mt_Medtr8g028630
MergedOrthoGroup001329Sub001		Ct_CtTrNR01601	Dg_DgTrNR09595	Mt_Medtr1g014120,Mt_Medtr3g105930,Mt_Medtr7g090170
MergedOrthoGroup001329Sub002		Ct_CtTrNR02643	Dg_DgTrNR09051,Dg_DgTrNR09052	Mt_Medtr1g014080,Mt_Medtr3g105950
MergedOrthoGroup001330		Ct_CtTrNR01602	Dg_DgTrNR12136	Mt_Medtr7g075453
MergedOrthoGroup001331Sub001		Ct_CtTrNR01603	Dg_DgTrNR02910	Mt_Medtr0172s0050,Mt_Medtr3g408350,Mt_Medtr5g065810
MergedOrthoGroup001332		Ct_CtTrNR01604	Dg_DgTrNR13688	Mt_Medtr1g075610
MergedOrthoGroup001333		Ct_CtTrNR01607	Dg_DgTrNR08471	Mt_Medtr1g112900,Mt_Medtr8g006725
MergedOrthoGroup001334		Ct_CtTrNR01608	Dg_DgTrNR14040	Mt_Medtr3g018770
MergedOrthoGroup001343		Ct_CtTrNR01619	Dg_DgTrNR06248	Mt_Medtr7g111860
MergedOrthoGroup001345Sub001		Ct_CtTrNR01621	Dg_DgTrNR14792	Mt_Medtr0071s0030,Mt_Medtr3g046640
MergedOrthoGroup001346Sub001		Ct_CtTrNR09395	Dg_DgTrNR13797	Mt_Medtr7g079970
MergedOrthoGroup001347		Ct_CtTrNR01623	Dg_DgTrNR01707,Dg_DgTrNR01708	Mt_Medtr8g076060
MergedOrthoGroup001348Sub001		Ct_CtTrNR01624	Dg_DgTrNR07930	Mt_Medtr1g066760
MergedOrthoGroup001348Sub002		Ct_CtTrNR04984	Dg_DgTrNR14537	Mt_Medtr8g081030
MergedOrthoGroup001348Sub003		Ct_CtTrNR10940	Dg_DgTrNR07367	Mt_Medtr3g067495,Mt_Medtr6g016870
MergedOrthoGroup001349Sub001		Ct_CtTrNR01625	Dg_DgTrNR15400	Mt_Medtr3g094260,Mt_Medtr3g094270
MergedOrthoGroup001351		Ct_CtTrNR01630	Dg_DgTrNR07572	Mt_Medtr3g115250,Mt_Medtr7g029115
MergedOrthoGroup001354Sub001		Ct_CtTrNR12393	Dg_DgTrNR05918	Mt_Medtr2g023500,Mt_Medtr4g132260,Mt_Medtr4g132270
MergedOrthoGroup001355		Ct_CtTrNR01636	Dg_DgTrNR09500	Mt_Medtr3g104810
MergedOrthoGroup001356		Ct_CtTrNR01637	Dg_DgTrNR04856	Mt_Medtr8g103840
MergedOrthoGroup001357		Ct_CtTrNR01638	Dg_DgTrNR11636	Mt_Medtr3g073640
MergedOrthoGroup001360		Ct_CtTrNR01641	Dg_DgTrNR10636	Mt_Medtr6g043510,Mt_Medtr6g043790
MergedOrthoGroup001364Sub001		Ct_CtTrNR06007	Dg_DgTrNR11536	Mt_Medtr3g085960
MergedOrthoGroup001365		Ct_CtTrNR01647	Dg_DgTrNR09345	Mt_Medtr8g069110
MergedOrthoGroup001371		Ct_CtTrNR01656	Dg_DgTrNR09106	Mt_Medtr5g033210
MergedOrthoGroup001372		Ct_CtTrNR01657	Dg_DgTrNR09415	Mt_Medtr8g461390
MergedOrthoGroup001373		Ct_CtTrNR01658	Dg_DgTrNR15207	Mt_Medtr8g103265
MergedOrthoGroup001374		Ct_CtTrNR01659	Dg_DgTrNR09602	Mt_Medtr8g066730
MergedOrthoGroup001379		Ct_CtTrNR01666	Dg_DgTrNR13413	Mt_Medtr8g064610
MergedOrthoGroup001380		Ct_CtTrNR01667	Dg_DgTrNR07380	Mt_Medtr2g450080
MergedOrthoGroup001381		Ct_CtTrNR01669	Dg_DgTrNR12592	Mt_Medtr3g101420
MergedOrthoGroup001382Sub001		Ct_CtTrNR01670	Dg_DgTrNR13627	Mt_Medtr8g070930
MergedOrthoGroup001382Sub002		Ct_CtTrNR03155	Dg_DgTrNR05543	Mt_Medtr0004s0230
MergedOrthoGroup001383		Ct_CtTrNR01671	Dg_DgTrNR04526	Mt_Medtr4g122220
MergedOrthoGroup001384		Ct_CtTrNR01674	Dg_DgTrNR07294	Mt_Medtr1g029310,Mt_Medtr2g008820,Mt_Medtr5g070670
MergedOrthoGroup001386Sub001		Ct_CtTrNR01678	Dg_DgTrNR10254	Mt_Medtr1g025220,Mt_Medtr1g025250,Mt_Medtr3g113890
MergedOrthoGroup001387Sub001		Ct_CtTrNR01679	Dg_DgTrNR06083	Mt_Medtr1g020080,Mt_Medtr3g101370
MergedOrthoGroup001387Sub002		Ct_CtTrNR13406	Dg_DgTrNR08077	Mt_Medtr3g101350
MergedOrthoGroup001389		Ct_CtTrNR01681	Dg_DgTrNR09759	Mt_Medtr4g093535
MergedOrthoGroup001390		Ct_CtTrNR01682	Dg_DgTrNR06868	Mt_Medtr4g127040
MergedOrthoGroup001391Sub001		Ct_CtTrNR09177	Dg_DgTrNR09444	Mt_Medtr5g030740,Mt_Medtr7g079600,Mt_Medtr7g079650,Mt_Medtr8g067590
MergedOrthoGroup001392		Ct_CtTrNR01685	Dg_DgTrNR08139,Dg_DgTrNR11484	Mt_Medtr2g041960,Mt_Medtr4g125260
MergedOrthoGroup001396Sub001		Ct_CtTrNR01690	Dg_DgTrNR00102	Mt_Medtr8g088380
MergedOrthoGroup001397		Ct_CtTrNR01692	Dg_DgTrNR00121	Mt_Medtr1g107485
MergedOrthoGroup001398		Ct_CtTrNR01693	Dg_DgTrNR12301	Mt_Medtr4g052800,Mt_Medtr4g052810,Mt_Medtr8g021030,Mt_Medtr8g021060
MergedOrthoGroup001399		Ct_CtTrNR01695	Dg_DgTrNR01857	Mt_Medtr5g026210
MergedOrthoGroup001400		Ct_CtTrNR01696	Dg_DgTrNR09664	Mt_Medtr2g461260
MergedOrthoGroup001403		Ct_CtTrNR01703,Ct_CtTrNR07148	Dg_DgTrNR01543,Dg_DgTrNR14882	Mt_Medtr2g014220,Mt_Medtr3g078653
MergedOrthoGroup001404		Ct_CtTrNR01704	Dg_DgTrNR15390	Mt_Medtr8g066180
MergedOrthoGroup001406Sub001		Ct_CtTrNR01706	Dg_DgTrNR12169	Mt_Medtr8g098895
MergedOrthoGroup001406Sub002		Ct_CtTrNR10084	Dg_DgTrNR01607	Mt_Medtr8g098910
MergedOrthoGroup001407Sub001		Ct_CtTrNR02882	Dg_DgTrNR09982,Dg_DgTrNR13724	Mt_Medtr5g029650,Mt_Medtr8g066340
MergedOrthoGroup001407Sub002		Ct_CtTrNR04634	Dg_DgTrNR10753,Dg_DgTrNR10754	Mt_Medtr7g082980
MergedOrthoGroup001407Sub003		Ct_CtTrNR09002	Dg_DgTrNR04082	Mt_Medtr6g465300
MergedOrthoGroup001409		Ct_CtTrNR01710	Dg_DgTrNR12645	Mt_Medtr7g020830
MergedOrthoGroup001410Sub001		Ct_CtTrNR01711	Dg_DgTrNR05391	Mt_Medtr4g094932,Mt_Medtr5g088767
MergedOrthoGroup001410Sub002		Ct_CtTrNR11394	Dg_DgTrNR06078	Mt_Medtr1g023955,Mt_Medtr1g423960
MergedOrthoGroup001411Sub001		Ct_CtTrNR01712	Dg_DgTrNR08730	Mt_Medtr8g085690
MergedOrthoGroup001411Sub002		Ct_CtTrNR04841	Dg_DgTrNR09021	Mt_Medtr3g083550
MergedOrthoGroup001411Sub003		Ct_CtTrNR09820	Dg_DgTrNR02004	Mt_Medtr1g054675
MergedOrthoGroup001411Sub004		Ct_CtTrNR12152	Dg_DgTrNR15198	Mt_Medtr8g085680,Mt_Medtr8g086050
MergedOrthoGroup001412		Ct_CtTrNR01713	Dg_DgTrNR13372	Mt_Medtr7g109145
MergedOrthoGroup001416		Ct_CtTrNR01717	Dg_DgTrNR06668	Mt_Medtr6g079570,Mt_Medtr8g107110
MergedOrthoGroup001417		Ct_CtTrNR01718	Dg_DgTrNR13049	Mt_Medtr1g114000,Mt_Medtr6g047580
MergedOrthoGroup001419Sub001		Ct_CtTrNR04683	Dg_DgTrNR00035	Mt_Medtr2g086510,Mt_Medtr4g053120
MergedOrthoGroup001419Sub002		Ct_CtTrNR09299	Dg_DgTrNR10581	Mt_Medtr1g112030,Mt_Medtr1g112050
MergedOrthoGroup001419Sub003		Ct_CtTrNR11989	Dg_DgTrNR03616	Mt_Medtr8g080290,Mt_Medtr8g080330,Mt_Medtr8g080360
MergedOrthoGroup001423		Ct_CtTrNR01725	Dg_DgTrNR11816	Mt_Medtr2g101370,Mt_Medtr8g013680
MergedOrthoGroup001424		Ct_CtTrNR01726	Dg_DgTrNR01739	Mt_Medtr7g083840
MergedOrthoGroup001425		Ct_CtTrNR01727	Dg_DgTrNR11460	Mt_Medtr7g083030,Mt_Medtr8g046320
MergedOrthoGroup001426Sub001		Ct_CtTrNR01728	Dg_DgTrNR01342	Mt_Medtr5g019120,Mt_Medtr8g078250
MergedOrthoGroup001429Sub001		Ct_CtTrNR01732	Dg_DgTrNR05298	Mt_Medtr2g046160
MergedOrthoGroup001430Sub001		Ct_CtTrNR01734	Dg_DgTrNR03215	Mt_Medtr3g462700,Mt_Medtr5g069660
MergedOrthoGroup001431Sub001		Ct_CtTrNR08816	Dg_DgTrNR02517	Mt_Medtr2g450070,Mt_Medtr4g131570,Mt_Medtr4g131580,Mt_Medtr4g131600
MergedOrthoGroup001432		Ct_CtTrNR01737	Dg_DgTrNR01352	Mt_Medtr1g090763,Mt_Medtr3g075210
MergedOrthoGroup001434		Ct_CtTrNR01739	Dg_DgTrNR09999	Mt_Medtr8g101910
MergedOrthoGroup001435Sub001		Ct_CtTrNR01740	Dg_DgTrNR05883	Mt_Medtr2g060900
MergedOrthoGroup001437Sub001		Ct_CtTrNR01742	Dg_DgTrNR01174	Mt_Medtr0175s0030,Mt_Medtr5g089510,Mt_Medtr7g033635
MergedOrthoGroup001437Sub002		Ct_CtTrNR02589	Dg_DgTrNR02516	Mt_Medtr4g078780
MergedOrthoGroup001438		Ct_CtTrNR01743	Dg_DgTrNR06326	Mt_Medtr3g118100
MergedOrthoGroup001440		Ct_CtTrNR01745	Dg_DgTrNR03264	Mt_Medtr3g108530
MergedOrthoGroup001441Sub001		Ct_CtTrNR01746	Dg_DgTrNR09888	Mt_Medtr2g006790,Mt_Medtr2g015550
MergedOrthoGroup001444		Ct_CtTrNR01749	Dg_DgTrNR00264	Mt_Medtr3g104670
MergedOrthoGroup001445		Ct_CtTrNR01750,Ct_CtTrNR01751	Dg_DgTrNR09485,Dg_DgTrNR11492	Mt_Medtr3g031220,Mt_Medtr5g074400
MergedOrthoGroup001447Sub001		Ct_CtTrNR01754	Dg_DgTrNR14072	Mt_Medtr7g108150
MergedOrthoGroup001447Sub002		Ct_CtTrNR03354	Dg_DgTrNR02234	Mt_Medtr7g108180
MergedOrthoGroup001448		Ct_CtTrNR01756	Dg_DgTrNR05930	Mt_Medtr8g012410
MergedOrthoGroup001449Sub001		Ct_CtTrNR06628	Dg_DgTrNR09124	Mt_Medtr5g048060,Mt_Medtr6g071330
MergedOrthoGroup001449Sub002		Ct_CtTrNR07323	Dg_DgTrNR00586,Dg_DgTrNR00587,Dg_DgTrNR00588	Mt_Medtr1g007740,Mt_Medtr3g491920
MergedOrthoGroup001451		Ct_CtTrNR01761	Dg_DgTrNR04307	Mt_Medtr1g070505
MergedOrthoGroup001452		Ct_CtTrNR01762	Dg_DgTrNR06486,Dg_DgTrNR15406	Mt_Medtr4g116990,Mt_Medtr4g117000
MergedOrthoGroup001453Sub001		Ct_CtTrNR01763	Dg_DgTrNR02902	Mt_Medtr8g088620
MergedOrthoGroup001454		Ct_CtTrNR01764	Dg_DgTrNR06225,Dg_DgTrNR12620	Mt_Medtr1g116940
MergedOrthoGroup001455Sub001		Ct_CtTrNR01765	Dg_DgTrNR13468	Mt_Medtr4g010120
MergedOrthoGroup001460		Ct_CtTrNR01772,Ct_CtTrNR14781	Dg_DgTrNR06677,Dg_DgTrNR06678	Mt_Medtr4g112430
MergedOrthoGroup001462		Ct_CtTrNR01774	Dg_DgTrNR00806,Dg_DgTrNR03289	Mt_Medtr1g081920
MergedOrthoGroup001463Sub001		Ct_CtTrNR01775	Dg_DgTrNR11934	Mt_Medtr4g033475
MergedOrthoGroup001465		Ct_CtTrNR01778	Dg_DgTrNR11863	Mt_Medtr8g089655
MergedOrthoGroup001468Sub001		Ct_CtTrNR01781	Dg_DgTrNR11939	Mt_Medtr4g021795
MergedOrthoGroup001468Sub002		Ct_CtTrNR02410	Dg_DgTrNR09024	Mt_Medtr7g062260
MergedOrthoGroup001470		Ct_CtTrNR01783	Dg_DgTrNR04183,Dg_DgTrNR04184	Mt_Medtr4g013290,Mt_Medtr7g070530
MergedOrthoGroup001471		Ct_CtTrNR01784	Dg_DgTrNR02622	Mt_Medtr2g025540,Mt_Medtr4g133000
MergedOrthoGroup001472		Ct_CtTrNR01785	Dg_DgTrNR08384,Dg_DgTrNR11858	Mt_Medtr1g104840
MergedOrthoGroup001473		Ct_CtTrNR01786	Dg_DgTrNR07400	Mt_Medtr8g019650
MergedOrthoGroup001474		Ct_CtTrNR01787	Dg_DgTrNR10048	Mt_Medtr2g085025
MergedOrthoGroup001477Sub001		Ct_CtTrNR01790	Dg_DgTrNR03571	Mt_Medtr7g096840
MergedOrthoGroup001477Sub002		Ct_CtTrNR04549	Dg_DgTrNR08713	Mt_Medtr3g011800
MergedOrthoGroup001477Sub003		Ct_CtTrNR13536	Dg_DgTrNR00293	Mt_Medtr3g077990
MergedOrthoGroup001478		Ct_CtTrNR01791	Dg_DgTrNR05479	Mt_Medtr4g083150
MergedOrthoGroup001479		Ct_CtTrNR01792	Dg_DgTrNR00698	Mt_Medtr1g016410
MergedOrthoGroup001481Sub001		Ct_CtTrNR02498	Dg_DgTrNR05828	Mt_Medtr1g073940
MergedOrthoGroup001481Sub002		Ct_CtTrNR05818	Dg_DgTrNR06960	Mt_Medtr1g073920
MergedOrthoGroup001483		Ct_CtTrNR01796	Dg_DgTrNR02127	Mt_Medtr1g084720
MergedOrthoGroup001484		Ct_CtTrNR01797	Dg_DgTrNR11633	Mt_Medtr3g110640
MergedOrthoGroup001485		Ct_CtTrNR01798	Dg_DgTrNR14822	Mt_Medtr6g024135
MergedOrthoGroup001487		Ct_CtTrNR01800	Dg_DgTrNR05959	Mt_Medtr2g031350,Mt_Medtr4g094532
MergedOrthoGroup001488		Ct_CtTrNR01801	Dg_DgTrNR11717	Mt_Medtr8g022290
MergedOrthoGroup001490Sub001		Ct_CtTrNR02054,Ct_CtTrNR10320	Dg_DgTrNR12886	Mt_Medtr3g099090
MergedOrthoGroup001490Sub002		Ct_CtTrNR03158	Dg_DgTrNR15170	Mt_Medtr8g032880
MergedOrthoGroup001490Sub003		Ct_CtTrNR04869	Dg_DgTrNR06387	Mt_Medtr6g016990
MergedOrthoGroup001490Sub004		Ct_CtTrNR05614	Dg_DgTrNR08223	Mt_Medtr2g005570,Mt_Medtr3g058940,Mt_Medtr4g134770
MergedOrthoGroup001492		Ct_CtTrNR01805	Dg_DgTrNR12308	Mt_Medtr1g102010,Mt_Medtr1g102035
MergedOrthoGroup001493		Ct_CtTrNR01806	Dg_DgTrNR01837	Mt_Medtr7g074680
MergedOrthoGroup001495Sub001		Ct_CtTrNR01809	Dg_DgTrNR10515	Mt_Medtr3g051950,Mt_Medtr5g092820
MergedOrthoGroup001496		Ct_CtTrNR01810	Dg_DgTrNR09618,Dg_DgTrNR11186	Mt_Medtr1g102590
MergedOrthoGroup001497		Ct_CtTrNR01811	Dg_DgTrNR07856	Mt_Medtr4g117370
MergedOrthoGroup001498Sub001		Ct_CtTrNR01812	Dg_DgTrNR08621	Mt_Medtr4g094590
MergedOrthoGroup001500Sub001		Ct_CtTrNR01814	Dg_DgTrNR11451	Mt_Medtr4g123070
MergedOrthoGroup001501		Ct_CtTrNR01815	Dg_DgTrNR10783	Mt_Medtr2g080130
MergedOrthoGroup001502Sub001		Ct_CtTrNR01817	Dg_DgTrNR06815	Mt_Medtr1g071720,Mt_Medtr7g095250
MergedOrthoGroup001503Sub001		Ct_CtTrNR01818	Dg_DgTrNR10348	Mt_Medtr2g005900
MergedOrthoGroup001503Sub002		Ct_CtTrNR02885	Dg_DgTrNR12399	Mt_Medtr0045s0110,Mt_Medtr4g039680,Mt_Medtr4g039720,Mt_Medtr4g039740
MergedOrthoGroup001505Sub001		Ct_CtTrNR01821	Dg_DgTrNR04551	Mt_Medtr2g090060,Mt_Medtr2g090070
MergedOrthoGroup001505Sub002		Ct_CtTrNR11814	Dg_DgTrNR14659	Mt_Medtr2g090055,Mt_Medtr4g046043,Mt_Medtr4g065010
MergedOrthoGroup001510		Ct_CtTrNR01826	Dg_DgTrNR12580	Mt_Medtr3g055370,Mt_Medtr5g094150
MergedOrthoGroup001511		Ct_CtTrNR01827	Dg_DgTrNR05914	Mt_Medtr5g009870,Mt_Medtr8g099045
MergedOrthoGroup001512Sub001		Ct_CtTrNR01828	Dg_DgTrNR10107	Mt_Medtr5g025470
MergedOrthoGroup001512Sub002		Ct_CtTrNR02330	Dg_DgTrNR15421	Mt_Medtr8g092200
MergedOrthoGroup001512Sub003		Ct_CtTrNR05903	Dg_DgTrNR08714	Mt_Medtr5g025410
MergedOrthoGroup001512Sub004		Ct_CtTrNR06413	Dg_DgTrNR01619	Mt_Medtr5g025290,Mt_Medtr5g025330,Mt_Medtr5g025340,Mt_Medtr5g025370,Mt_Medtr5g025400,Mt_Medtr8g072350
MergedOrthoGroup001513		Ct_CtTrNR01830	Dg_DgTrNR04915	Mt_Medtr0361s0030,Mt_Medtr8g015230
MergedOrthoGroup001514		Ct_CtTrNR01831,Ct_CtTrNR01832	Dg_DgTrNR02385	Mt_Medtr6g463330
MergedOrthoGroup001516		Ct_CtTrNR01834	Dg_DgTrNR13205	Mt_Medtr4g124640
MergedOrthoGroup001517		Ct_CtTrNR01835	Dg_DgTrNR12286	Mt_Medtr5g012120
MergedOrthoGroup001518		Ct_CtTrNR01836,Ct_CtTrNR01837	Dg_DgTrNR04097	Mt_Medtr7g069480
MergedOrthoGroup001521Sub001		Ct_CtTrNR01840	Dg_DgTrNR11457	Mt_Medtr2g460810
MergedOrthoGroup001521Sub002		Ct_CtTrNR03051	Dg_DgTrNR03072	Mt_Medtr4g116430
MergedOrthoGroup001522Sub001		Ct_CtTrNR01841	Dg_DgTrNR09742	Mt_Medtr2g013440,Mt_Medtr4g088915
MergedOrthoGroup001523		Ct_CtTrNR01842	Dg_DgTrNR01043	Mt_Medtr6g004430
MergedOrthoGroup001524		Ct_CtTrNR01843	Dg_DgTrNR08373	Mt_Medtr7g077380
MergedOrthoGroup001526		Ct_CtTrNR01845	Dg_DgTrNR12710	Mt_Medtr0004s0220,Mt_Medtr1g066930,Mt_Medtr4g063470
MergedOrthoGroup001527		Ct_CtTrNR01846	Dg_DgTrNR01193	Mt_Medtr8g075140
MergedOrthoGroup001528Sub001		Ct_CtTrNR01847	Dg_DgTrNR05743	Mt_Medtr1g081280
MergedOrthoGroup001529		Ct_CtTrNR01850	Dg_DgTrNR06117	Mt_Medtr4g097010,Mt_Medtr5g015530
MergedOrthoGroup001530		Ct_CtTrNR01851	Dg_DgTrNR10635	Mt_Medtr5g009260
MergedOrthoGroup001531		Ct_CtTrNR01852	Dg_DgTrNR04988	Mt_Medtr7g089190
MergedOrthoGroup001533Sub001		Ct_CtTrNR01854	Dg_DgTrNR05924	Mt_Medtr8g098715
MergedOrthoGroup001533Sub002		Ct_CtTrNR04166	Dg_DgTrNR10382	Mt_Medtr4g083940
MergedOrthoGroup001534		Ct_CtTrNR01855	Dg_DgTrNR03070	Mt_Medtr3g053700
MergedOrthoGroup001535		Ct_CtTrNR01856,Ct_CtTrNR04167	Dg_DgTrNR13935	Mt_Medtr3g026250,Mt_Medtr4g116420
MergedOrthoGroup001538		Ct_CtTrNR01860	Dg_DgTrNR11979	Mt_Medtr3g037560,Mt_Medtr4g108780
MergedOrthoGroup001539		Ct_CtTrNR01861	Dg_DgTrNR05012	Mt_Medtr1g106775
MergedOrthoGroup001540		Ct_CtTrNR01862	Dg_DgTrNR08692	Mt_Medtr5g017490
MergedOrthoGroup001541Sub001		Ct_CtTrNR13685,Ct_CtTrNR13686,Ct_CtTrNR13687	Dg_DgTrNR00180	Mt_Medtr3g074860,Mt_Medtr3g074890,Mt_Medtr5g064340,Mt_Medtr5g064345,Mt_Medtr5g064360,Mt_Medtr5g464340
MergedOrthoGroup001542		Ct_CtTrNR01864	Dg_DgTrNR06096	Mt_Medtr2g460790,Mt_Medtr4g130980
MergedOrthoGroup001547Sub001		Ct_CtTrNR01871	Dg_DgTrNR06645	Mt_Medtr4g076200,Mt_Medtr5g009020
MergedOrthoGroup001547Sub002		Ct_CtTrNR07178	Dg_DgTrNR14153	Mt_Medtr5g009010
MergedOrthoGroup001551		Ct_CtTrNR01875	Dg_DgTrNR05526	Mt_Medtr5g037120
MergedOrthoGroup001553		Ct_CtTrNR01877,Ct_CtTrNR04733	Dg_DgTrNR00388	Mt_Medtr8g010570
MergedOrthoGroup001555		Ct_CtTrNR01879	Dg_DgTrNR11241	Mt_Medtr1g017990,Mt_Medtr3g103190
MergedOrthoGroup001556Sub001		Ct_CtTrNR01880	Dg_DgTrNR13124	Mt_Medtr4g132250
MergedOrthoGroup001557		Ct_CtTrNR01881	Dg_DgTrNR08385	Mt_Medtr1g066460,Mt_Medtr7g100980
MergedOrthoGroup001558Sub001		Ct_CtTrNR01882	Dg_DgTrNR06905,Dg_DgTrNR12032	Mt_Medtr3g091660,Mt_Medtr3g091670,Mt_Medtr5g007360
MergedOrthoGroup001558Sub002		Ct_CtTrNR04394	Dg_DgTrNR04700	Mt_Medtr5g019350,Mt_Medtr8g078170,Mt_Medtr8g107230
MergedOrthoGroup001558Sub003		Ct_CtTrNR04597	Dg_DgTrNR09807	Mt_Medtr2g026530
MergedOrthoGroup001558Sub004		Ct_CtTrNR06064	Dg_DgTrNR07076	Mt_Medtr2g026510,Mt_Medtr4g133720
MergedOrthoGroup001558Sub005		Ct_CtTrNR10539	Dg_DgTrNR02191	Mt_Medtr8g078370
MergedOrthoGroup001559Sub001		Ct_CtTrNR13227	Dg_DgTrNR09273	Mt_Medtr3g079200
MergedOrthoGroup001559Sub002		Ct_CtTrNR13447	Dg_DgTrNR04179	Mt_Medtr4g081725,Mt_Medtr8g030840,Mt_Medtr8g446970
MergedOrthoGroup001560		Ct_CtTrNR01885	Dg_DgTrNR08537	Mt_Medtr3g073140
MergedOrthoGroup001565Sub001		Ct_CtTrNR13633	Dg_DgTrNR09850	Mt_Medtr0036s0140
MergedOrthoGroup001566		Ct_CtTrNR01891	Dg_DgTrNR04569	Mt_Medtr8g075010
MergedOrthoGroup001567Sub001		Ct_CtTrNR01892	Dg_DgTrNR11136	Mt_Medtr1g032440,Mt_Medtr8g105330
MergedOrthoGroup001567Sub002		Ct_CtTrNR02488	Dg_DgTrNR03838	Mt_Medtr1g032520,Mt_Medtr8g021120,Mt_Medtr8g105350
MergedOrthoGroup001567Sub003		Ct_CtTrNR02607	Dg_DgTrNR04749	Mt_Medtr2g047110,Mt_Medtr8g089250
MergedOrthoGroup001568Sub001		Ct_CtTrNR06829,Ct_CtTrNR12098	Dg_DgTrNR01945	Mt_Medtr1g063180
MergedOrthoGroup001568Sub002		Ct_CtTrNR14305	Dg_DgTrNR07924	Mt_Medtr1g038570,Mt_Medtr3g114845
MergedOrthoGroup001570		Ct_CtTrNR01896	Dg_DgTrNR02104,Dg_DgTrNR10234	Mt_Medtr1g041745,Mt_Medtr1g075460
MergedOrthoGroup001571		Ct_CtTrNR01897	Dg_DgTrNR14586	Mt_Medtr7g074150,Mt_Medtr8g005120
MergedOrthoGroup001575		Ct_CtTrNR01903	Dg_DgTrNR06919	Mt_Medtr7g117620
MergedOrthoGroup001576Sub001		Ct_CtTrNR12802	Dg_DgTrNR06090	Mt_Medtr3g115900
MergedOrthoGroup001581		Ct_CtTrNR01909,Ct_CtTrNR01910	Dg_DgTrNR08414	Mt_Medtr8g033070
MergedOrthoGroup001582		Ct_CtTrNR01911	Dg_DgTrNR08183	Mt_Medtr3g096410,Mt_Medtr8g093840
MergedOrthoGroup001583		Ct_CtTrNR01913	Dg_DgTrNR15409	Mt_Medtr2g085075
MergedOrthoGroup001585		Ct_CtTrNR01918	Dg_DgTrNR10899	Mt_Medtr7g088040
MergedOrthoGroup001586		Ct_CtTrNR01919	Dg_DgTrNR14866	Mt_Medtr4g127350
MergedOrthoGroup001587		Ct_CtTrNR01920	Dg_DgTrNR10272	Mt_Medtr3g073960
MergedOrthoGroup001589		Ct_CtTrNR01922	Dg_DgTrNR01469	Mt_Medtr4g064917
MergedOrthoGroup001592Sub001		Ct_CtTrNR14776	Dg_DgTrNR07716	Mt_Medtr8g104990
MergedOrthoGroup001594Sub001		Ct_CtTrNR05735	Dg_DgTrNR08864	Mt_Medtr0024s0020,Mt_Medtr7g117150
MergedOrthoGroup001595Sub001		Ct_CtTrNR01929	Dg_DgTrNR11781	Mt_Medtr5g092080
MergedOrthoGroup001595Sub002		Ct_CtTrNR04013	Dg_DgTrNR06806	Mt_Medtr4g134950
MergedOrthoGroup001595Sub003		Ct_CtTrNR04601	Dg_DgTrNR03552	Mt_Medtr4g134910
MergedOrthoGroup001595Sub004		Ct_CtTrNR08967	Dg_DgTrNR02075	Mt_Medtr3g067725
MergedOrthoGroup001595Sub005		Ct_CtTrNR10417	Dg_DgTrNR07360	Mt_Medtr1g039400,Mt_Medtr1g039410
MergedOrthoGroup001595Sub006		Ct_CtTrNR10866,Ct_CtTrNR11242,Ct_CtTrNR11852	Dg_DgTrNR04927,Dg_DgTrNR05889	Mt_Medtr7g117595,Mt_Medtr8g070000
MergedOrthoGroup001597		Ct_CtTrNR01931	Dg_DgTrNR14507	Mt_Medtr1g021070,Mt_Medtr3g101320
MergedOrthoGroup001598		Ct_CtTrNR01932	Dg_DgTrNR01982	Mt_Medtr7g022870
MergedOrthoGroup001599		Ct_CtTrNR01933	Dg_DgTrNR03959	Mt_Medtr1g484850
MergedOrthoGroup001600		Ct_CtTrNR01934	Dg_DgTrNR02196	Mt_Medtr2g010540
MergedOrthoGroup001602		Ct_CtTrNR01938	Dg_DgTrNR04033	Mt_Medtr1g108700
MergedOrthoGroup001603		Ct_CtTrNR01939,Ct_CtTrNR01940,Ct_CtTrNR14428,Ct_CtTrNR14429	Dg_DgTrNR09849	Mt_Medtr5g020740,Mt_Medtr5g020760,Mt_Medtr5g020800
MergedOrthoGroup001607Sub001		Ct_CtTrNR05095	Dg_DgTrNR09741	Mt_Medtr2g078640
MergedOrthoGroup001607Sub002		Ct_CtTrNR05135	Dg_DgTrNR09981	Mt_Medtr2g078650
MergedOrthoGroup001609		Ct_CtTrNR01947	Dg_DgTrNR04446	Mt_Medtr3g100220
MergedOrthoGroup001611		Ct_CtTrNR01949	Dg_DgTrNR12922	Mt_Medtr2g023850
MergedOrthoGroup001612Sub001		Ct_CtTrNR01950	Dg_DgTrNR10085	Mt_Medtr1g096320
MergedOrthoGroup001612Sub002		Ct_CtTrNR10886	Dg_DgTrNR14161	Mt_Medtr3g095490,Mt_Medtr4g103830
MergedOrthoGroup001612Sub003		Ct_CtTrNR13974,Ct_CtTrNR13975	Dg_DgTrNR04139	Mt_Medtr4g071040
MergedOrthoGroup001614Sub001		Ct_CtTrNR01952	Dg_DgTrNR05186	Mt_Medtr1g115270
MergedOrthoGroup001614Sub002		Ct_CtTrNR06445	Dg_DgTrNR14337	Mt_Medtr5g098940
MergedOrthoGroup001616		Ct_CtTrNR01954	Dg_DgTrNR08733	Mt_Medtr4g086290
MergedOrthoGroup001617Sub001		Ct_CtTrNR01956,Ct_CtTrNR09260	Dg_DgTrNR09836,Dg_DgTrNR14479	Mt_Medtr2g103150,Mt_Medtr4g011340
MergedOrthoGroup001622Sub001		Ct_CtTrNR01962	Dg_DgTrNR03452	Mt_Medtr6g093220
MergedOrthoGroup001622Sub002		Ct_CtTrNR08422	Dg_DgTrNR14076	Mt_Medtr4g090620
MergedOrthoGroup001625		Ct_CtTrNR01965	Dg_DgTrNR01222	Mt_Medtr8g101250
MergedOrthoGroup001626Sub001		Ct_CtTrNR06637	Dg_DgTrNR01968	Mt_Medtr3g093690
MergedOrthoGroup001627Sub001		Ct_CtTrNR01967	Dg_DgTrNR07254	Mt_Medtr0003s0470,Mt_Medtr3g462280
MergedOrthoGroup001628		Ct_CtTrNR01969	Dg_DgTrNR10850	Mt_Medtr4g114690
MergedOrthoGroup001632Sub001		Ct_CtTrNR03488	Dg_DgTrNR08847	Mt_Medtr3g103350
MergedOrthoGroup001636		Ct_CtTrNR01980	Dg_DgTrNR05854	Mt_Medtr3g009230
MergedOrthoGroup001638		Ct_CtTrNR01982	Dg_DgTrNR07975,Dg_DgTrNR07976	Mt_Medtr3g098210
MergedOrthoGroup001639		Ct_CtTrNR01983	Dg_DgTrNR09445	Mt_Medtr2g014360
MergedOrthoGroup001640		Ct_CtTrNR01984	Dg_DgTrNR11714	Mt_Medtr7g052640
MergedOrthoGroup001641Sub001		Ct_CtTrNR03338	Dg_DgTrNR03867	Mt_Medtr2g104110
MergedOrthoGroup001642		Ct_CtTrNR01987	Dg_DgTrNR09431	Mt_Medtr6g026940,Mt_Medtr6g027030,Mt_Medtr6g027110
MergedOrthoGroup001643Sub001		Ct_CtTrNR01988	Dg_DgTrNR11409	Mt_Medtr2g016050,Mt_Medtr8g075320
MergedOrthoGroup001643Sub002		Ct_CtTrNR09162	Dg_DgTrNR11057	Mt_Medtr5g022470,Mt_Medtr8g075340
MergedOrthoGroup001644Sub001		Ct_CtTrNR01990	Dg_DgTrNR09922	Mt_Medtr1g052270
MergedOrthoGroup001645		Ct_CtTrNR01991	Dg_DgTrNR04529	Mt_Medtr5g097480
MergedOrthoGroup001647		Ct_CtTrNR01993	Dg_DgTrNR14770	Mt_Medtr4g094420
MergedOrthoGroup001648		Ct_CtTrNR01994	Dg_DgTrNR02534	Mt_Medtr4g083460
MergedOrthoGroup001649Sub001		Ct_CtTrNR02243	Dg_DgTrNR06150,Dg_DgTrNR13708	Mt_Medtr4g011980
MergedOrthoGroup001650		Ct_CtTrNR01996	Dg_DgTrNR01165	Mt_Medtr3g075440,Mt_Medtr8g092950
MergedOrthoGroup001651		Ct_CtTrNR01997	Dg_DgTrNR10910	Mt_Medtr5g069410
MergedOrthoGroup001652		Ct_CtTrNR01998	Dg_DgTrNR15203,Dg_DgTrNR15204,Dg_DgTrNR15205	Mt_Medtr4g071060,Mt_Medtr4g072340,Mt_Medtr4g072790,Mt_Medtr4g073660
MergedOrthoGroup001653		Ct_CtTrNR01999	Dg_DgTrNR07786	Mt_Medtr3g074070
MergedOrthoGroup001657		Ct_CtTrNR02003	Dg_DgTrNR01218	Mt_Medtr4g123900
MergedOrthoGroup001660		Ct_CtTrNR02006	Dg_DgTrNR07513	Mt_Medtr2g022780,Mt_Medtr4g131840
MergedOrthoGroup001661		Ct_CtTrNR02007	Dg_DgTrNR07719	Mt_Medtr8g037810
MergedOrthoGroup001664		Ct_CtTrNR02015	Dg_DgTrNR05802	Mt_Medtr1g112510
MergedOrthoGroup001666		Ct_CtTrNR02018	Dg_DgTrNR07973	Mt_Medtr1g080500
MergedOrthoGroup001669		Ct_CtTrNR02021	Dg_DgTrNR09432	Mt_Medtr2g063080
MergedOrthoGroup001670		Ct_CtTrNR02022	Dg_DgTrNR04774	Mt_Medtr0939s0010,Mt_Medtr2g089170
MergedOrthoGroup001671		Ct_CtTrNR02024	Dg_DgTrNR01899	Mt_Medtr7g061540
MergedOrthoGroup001674		Ct_CtTrNR02027	Dg_DgTrNR07079	Mt_Medtr1g104680,Mt_Medtr5g006110
MergedOrthoGroup001675		Ct_CtTrNR02028	Dg_DgTrNR10702	Mt_Medtr6g080440
MergedOrthoGroup001680Sub001		Ct_CtTrNR10104	Dg_DgTrNR04859	Mt_Medtr0009s0390
MergedOrthoGroup001681Sub001		Ct_CtTrNR05872	Dg_DgTrNR05736	Mt_Medtr2g081080,Mt_Medtr8g007590,Mt_Medtr8g007595
MergedOrthoGroup001683Sub001		Ct_CtTrNR02036	Dg_DgTrNR12942	Mt_Medtr4g036265
MergedOrthoGroup001683Sub002		Ct_CtTrNR14595	Dg_DgTrNR07092	Mt_Medtr7g046250
MergedOrthoGroup001684		Ct_CtTrNR02037	Dg_DgTrNR14452	Mt_Medtr8g089810
MergedOrthoGroup001685		Ct_CtTrNR02038	Dg_DgTrNR08842,Dg_DgTrNR08843,Dg_DgTrNR11021	Mt_Medtr4g095320
MergedOrthoGroup001689		Ct_CtTrNR02043	Dg_DgTrNR09253	Mt_Medtr2g034010
MergedOrthoGroup001690		Ct_CtTrNR02044	Dg_DgTrNR11482	Mt_Medtr3g086600
MergedOrthoGroup001691Sub001		Ct_CtTrNR02045	Dg_DgTrNR10058	Mt_Medtr4g095600,Mt_Medtr5g015880
MergedOrthoGroup001692		Ct_CtTrNR02046	Dg_DgTrNR10261	Mt_Medtr1g089600,Mt_Medtr7g094100
MergedOrthoGroup001694		Ct_CtTrNR02048	Dg_DgTrNR02059	Mt_Medtr2g009630
MergedOrthoGroup001695		Ct_CtTrNR02049	Dg_DgTrNR07918	Mt_Medtr4g100360
MergedOrthoGroup001697		Ct_CtTrNR02053	Dg_DgTrNR01023	Mt_Medtr8g027760
MergedOrthoGroup001699		Ct_CtTrNR02059	Dg_DgTrNR00423,Dg_DgTrNR00424	Mt_Medtr4g116460
MergedOrthoGroup001701Sub001		Ct_CtTrNR02062	Dg_DgTrNR12715	Mt_Medtr4g089000,Mt_Medtr4g089010
MergedOrthoGroup001701Sub002		Ct_CtTrNR07809	Dg_DgTrNR02756	Mt_Medtr2g013220,Mt_Medtr4g088980
MergedOrthoGroup001704		Ct_CtTrNR02065	Dg_DgTrNR08910	Mt_Medtr5g087560
MergedOrthoGroup001706		Ct_CtTrNR02067	Dg_DgTrNR01358,Dg_DgTrNR01359	Mt_Medtr3g055960,Mt_Medtr5g094340
MergedOrthoGroup001708		Ct_CtTrNR02069	Dg_DgTrNR14952	Mt_Medtr5g038440,Mt_Medtr8g469270
MergedOrthoGroup001710		Ct_CtTrNR02072	Dg_DgTrNR01613	Mt_Medtr5g048350
MergedOrthoGroup001711		Ct_CtTrNR02073,Ct_CtTrNR02074	Dg_DgTrNR01702,Dg_DgTrNR07221,Dg_DgTrNR09691	Mt_Medtr1g097250,Mt_Medtr6g038640,Mt_Medtr6g038650
MergedOrthoGroup001712		Ct_CtTrNR02075	Dg_DgTrNR12205	Mt_Medtr4g020070
MergedOrthoGroup001713Sub001		Ct_CtTrNR02076	Dg_DgTrNR15078	Mt_Medtr1g032120
MergedOrthoGroup001714		Ct_CtTrNR02077	Dg_DgTrNR13735	Mt_Medtr8g105780
MergedOrthoGroup001715		Ct_CtTrNR02078	Dg_DgTrNR04822	Mt_Medtr1g090370,Mt_Medtr3g087940,Mt_Medtr8g091650
MergedOrthoGroup001716Sub001		Ct_CtTrNR02079	Dg_DgTrNR07047	Mt_Medtr5g058810,Mt_Medtr5g059080
MergedOrthoGroup001719		Ct_CtTrNR02082	Dg_DgTrNR14725	Mt_Medtr3g462930,Mt_Medtr5g069780
MergedOrthoGroup001720		Ct_CtTrNR02083	Dg_DgTrNR06139	Mt_Medtr2g082570,Mt_Medtr4g081390
MergedOrthoGroup001721Sub001		Ct_CtTrNR02085	Dg_DgTrNR10728	Mt_Medtr1g093770
MergedOrthoGroup001723		Ct_CtTrNR02087	Dg_DgTrNR02704	Mt_Medtr1g106530
MergedOrthoGroup001724		Ct_CtTrNR02088	Dg_DgTrNR04593	Mt_Medtr4g088505
MergedOrthoGroup001725		Ct_CtTrNR02089	Dg_DgTrNR14644	Mt_Medtr8g027805
MergedOrthoGroup001727		Ct_CtTrNR02093	Dg_DgTrNR02774	Mt_Medtr6g034935,Mt_Medtr6g049050
MergedOrthoGroup001729		Ct_CtTrNR02095	Dg_DgTrNR08099	Mt_Medtr1g102070,Mt_Medtr6g464620
MergedOrthoGroup001730Sub001		Ct_CtTrNR02096	Dg_DgTrNR04095	Mt_Medtr8g061890
MergedOrthoGroup001731		Ct_CtTrNR02098	Dg_DgTrNR10571	Mt_Medtr1g056640
MergedOrthoGroup001732		Ct_CtTrNR02100	Dg_DgTrNR01422	Mt_Medtr7g028780
MergedOrthoGroup001733		Ct_CtTrNR02101	Dg_DgTrNR03473	Mt_Medtr4g102220,Mt_Medtr5g011800,Mt_Medtr5g011820
MergedOrthoGroup001734Sub001		Ct_CtTrNR02102	Dg_DgTrNR02014	Mt_Medtr2g070400
MergedOrthoGroup001734Sub002		Ct_CtTrNR12476	Dg_DgTrNR13315	Mt_Medtr2g070390
MergedOrthoGroup001736Sub001		Ct_CtTrNR02332	Dg_DgTrNR04379	Mt_Medtr3g032980,Mt_Medtr3g435710
MergedOrthoGroup001736Sub002		Ct_CtTrNR07174,Ct_CtTrNR07568	Dg_DgTrNR09111	Mt_Medtr7g023250
MergedOrthoGroup001736Sub003		Ct_CtTrNR11434	Dg_DgTrNR02679,Dg_DgTrNR04600	Mt_Medtr3g078410
MergedOrthoGroup001736Sub004		Ct_CtTrNR13390	Dg_DgTrNR13632	Mt_Medtr1g115475,Mt_Medtr7g023060
MergedOrthoGroup001738Sub001		Ct_CtTrNR12240	Dg_DgTrNR03474	Mt_Medtr2g015360
MergedOrthoGroup001739		Ct_CtTrNR02108	Dg_DgTrNR05615	Mt_Medtr8g093800
MergedOrthoGroup001740		Ct_CtTrNR02109	Dg_DgTrNR01938	Mt_Medtr1g096170
MergedOrthoGroup001743Sub001		Ct_CtTrNR02114	Dg_DgTrNR01369	Mt_Medtr4g005900
MergedOrthoGroup001743Sub002		Ct_CtTrNR04119	Dg_DgTrNR04014	Mt_Medtr2g035310
MergedOrthoGroup001744Sub001		Ct_CtTrNR04855	Dg_DgTrNR00569	Mt_Medtr8g067265
MergedOrthoGroup001746		Ct_CtTrNR02117	Dg_DgTrNR11043	Mt_Medtr4g102550
MergedOrthoGroup001747		Ct_CtTrNR02118	Dg_DgTrNR04523	Mt_Medtr4g060540,Mt_Medtr6g084450
MergedOrthoGroup001749		Ct_CtTrNR02120	Dg_DgTrNR10874	Mt_Medtr4g117820,Mt_Medtr5g037160,Mt_Medtr5g038600,Mt_Medtr8g468500
MergedOrthoGroup001753		Ct_CtTrNR02125	Dg_DgTrNR02601	Mt_Medtr2g079490,Mt_Medtr8g059125
MergedOrthoGroup001756Sub001		Ct_CtTrNR02129	Dg_DgTrNR09763	Mt_Medtr3g114300,Mt_Medtr8g028265
MergedOrthoGroup001757Sub001		Ct_CtTrNR02512	Dg_DgTrNR01115	Mt_Medtr6g033070
MergedOrthoGroup001757Sub002		Ct_CtTrNR11235	Dg_DgTrNR12663	Mt_Medtr6g033065
MergedOrthoGroup001759Sub001		Ct_CtTrNR02133	Dg_DgTrNR05405	Mt_Medtr4g112045
MergedOrthoGroup001759Sub002		Ct_CtTrNR05855	Dg_DgTrNR03410	Mt_Medtr6g087910
MergedOrthoGroup001760Sub001		Ct_CtTrNR02134	Dg_DgTrNR13217	Mt_Medtr8g074930
MergedOrthoGroup001760Sub002		Ct_CtTrNR04012	Dg_DgTrNR04507	Mt_Medtr1g023210,Mt_Medtr8g087510
MergedOrthoGroup001760Sub003		Ct_CtTrNR06259	Dg_DgTrNR09277	Mt_Medtr1g031180,Mt_Medtr3g098470,Mt_Medtr8g096060
MergedOrthoGroup001760Sub004		Ct_CtTrNR07448	Dg_DgTrNR00393	Mt_Medtr0400s0010,Mt_Medtr1g038920,Mt_Medtr1g039010
MergedOrthoGroup001760Sub005		Ct_CtTrNR08897	Dg_DgTrNR13196	Mt_Medtr5g087520,Mt_Medtr6g040240
MergedOrthoGroup001760Sub006		Ct_CtTrNR09371	Dg_DgTrNR07787	Mt_Medtr1g100070,Mt_Medtr6g048440
MergedOrthoGroup001763		Ct_CtTrNR02137,Ct_CtTrNR02138,Ct_CtTrNR10202	Dg_DgTrNR13262	Mt_Medtr8g019620
MergedOrthoGroup001764Sub001		Ct_CtTrNR02139	Dg_DgTrNR06705,Dg_DgTrNR06707,Dg_DgTrNR11886	Mt_Medtr0286s0010,Mt_Medtr6g008075
MergedOrthoGroup001766		Ct_CtTrNR02141	Dg_DgTrNR04147	Mt_Medtr3g070780
MergedOrthoGroup001767		Ct_CtTrNR02143	Dg_DgTrNR02180	Mt_Medtr5g023060,Mt_Medtr8g074790
MergedOrthoGroup001770		Ct_CtTrNR02146,Ct_CtTrNR02305	Dg_DgTrNR00454,Dg_DgTrNR12751	Mt_Medtr1g032450,Mt_Medtr8g105340
MergedOrthoGroup001774		Ct_CtTrNR02150	Dg_DgTrNR04711	Mt_Medtr2g020900,Mt_Medtr2g020930,Mt_Medtr2g020950
MergedOrthoGroup001775		Ct_CtTrNR02151	Dg_DgTrNR13187	Mt_Medtr6g084520
MergedOrthoGroup001776Sub001		Ct_CtTrNR09783	Dg_DgTrNR14205	Mt_Medtr1g071610
MergedOrthoGroup001778		Ct_CtTrNR02154	Dg_DgTrNR07077,Dg_DgTrNR14894	Mt_Medtr1g061590,Mt_Medtr7g103440
MergedOrthoGroup001779		Ct_CtTrNR02155	Dg_DgTrNR08168	Mt_Medtr7g074170
MergedOrthoGroup001780		Ct_CtTrNR02156	Dg_DgTrNR11100	Mt_Medtr2g060050
MergedOrthoGroup001782		Ct_CtTrNR02159	Dg_DgTrNR13538	Mt_Medtr4g057970
MergedOrthoGroup001783		Ct_CtTrNR02160	Dg_DgTrNR04215	Mt_Medtr3g109540
MergedOrthoGroup001784		Ct_CtTrNR02161	Dg_DgTrNR11847	Mt_Medtr0388s0020,Mt_Medtr4g025830
MergedOrthoGroup001785Sub001		Ct_CtTrNR02162	Dg_DgTrNR00246	Mt_Medtr1g012000,Mt_Medtr1g012020
MergedOrthoGroup001786		Ct_CtTrNR02163	Dg_DgTrNR07726	Mt_Medtr5g083490
MergedOrthoGroup001787		Ct_CtTrNR02164	Dg_DgTrNR09364	Mt_Medtr4g130900
MergedOrthoGroup001789		Ct_CtTrNR02166	Dg_DgTrNR14520	Mt_Medtr3g112420
MergedOrthoGroup001790		Ct_CtTrNR02167,Ct_CtTrNR03855	Dg_DgTrNR08254	Mt_Medtr1g112520,Mt_Medtr6g071595,Mt_Medtr6g071605,Mt_Medtr6g071615,Mt_Medtr8g107640
MergedOrthoGroup001791Sub001		Ct_CtTrNR02169	Dg_DgTrNR02231	Mt_Medtr1g106735
MergedOrthoGroup001791Sub002		Ct_CtTrNR12877	Dg_DgTrNR08909	Mt_Medtr2g094180,Mt_Medtr4g059450
MergedOrthoGroup001792Sub001		Ct_CtTrNR08694	Dg_DgTrNR04235	Mt_Medtr7g079850
MergedOrthoGroup001793		Ct_CtTrNR02171	Dg_DgTrNR15448	Mt_Medtr1g083950
MergedOrthoGroup001794		Ct_CtTrNR02172	Dg_DgTrNR13581	Mt_Medtr4g112900
MergedOrthoGroup001795		Ct_CtTrNR02174	Dg_DgTrNR08924	Mt_Medtr3g073470,Mt_Medtr7g012360
MergedOrthoGroup001797Sub001		Ct_CtTrNR02176	Dg_DgTrNR08939	Mt_Medtr6g033235,Mt_Medtr7g084170
MergedOrthoGroup001799Sub001		Ct_CtTrNR02178	Dg_DgTrNR07314	Mt_Medtr3g109922
MergedOrthoGroup001800Sub001		Ct_CtTrNR02179	Dg_DgTrNR10849	Mt_Medtr5g039730,Mt_Medtr7g039810,Mt_Medtr7g445250,Mt_Medtr7g445270
MergedOrthoGroup001800Sub002		Ct_CtTrNR03366	Dg_DgTrNR08990	Mt_Medtr7g113620
MergedOrthoGroup001803		Ct_CtTrNR02183	Dg_DgTrNR11402	Mt_Medtr5g087700
MergedOrthoGroup001804		Ct_CtTrNR02184	Dg_DgTrNR05701	Mt_Medtr6g086455
MergedOrthoGroup001805Sub001		Ct_CtTrNR02185	Dg_DgTrNR11701	Mt_Medtr2g024420
MergedOrthoGroup001806Sub001		Ct_CtTrNR10201	Dg_DgTrNR03610	Mt_Medtr3g110020,Mt_Medtr5g010010,Mt_Medtr7g053480
MergedOrthoGroup001808		Ct_CtTrNR02188	Dg_DgTrNR06026	Mt_Medtr4g049500
MergedOrthoGroup001810Sub001		Ct_CtTrNR02190	Dg_DgTrNR01454	Mt_Medtr1g069860,Mt_Medtr1g069870,Mt_Medtr1g069890,Mt_Medtr1g069900
MergedOrthoGroup001810Sub002		Ct_CtTrNR04200	Dg_DgTrNR13758	Mt_Medtr1g069855
MergedOrthoGroup001810Sub003		Ct_CtTrNR15184	Dg_DgTrNR01164	Mt_Medtr3g058560,Mt_Medtr4g131540
MergedOrthoGroup001811		Ct_CtTrNR02191	Dg_DgTrNR04148	Mt_Medtr1g109080
MergedOrthoGroup001812		Ct_CtTrNR02192	Dg_DgTrNR02721	Mt_Medtr5g097890
MergedOrthoGroup001813		Ct_CtTrNR02193	Dg_DgTrNR08904	Mt_Medtr2g089080,Mt_Medtr4g045743,Mt_Medtr5g037340,Mt_Medtr5g037343
MergedOrthoGroup001816		Ct_CtTrNR02196	Dg_DgTrNR11377	Mt_Medtr2g078240,Mt_Medtr2g078250
MergedOrthoGroup001819Sub001		Ct_CtTrNR02199	Dg_DgTrNR14692	Mt_Medtr2g048900
MergedOrthoGroup001819Sub002		Ct_CtTrNR03949	Dg_DgTrNR01279	Mt_Medtr1g078400
MergedOrthoGroup001821		Ct_CtTrNR02201	Dg_DgTrNR09158	Mt_Medtr0002s0020
MergedOrthoGroup001822		Ct_CtTrNR02202	Dg_DgTrNR10633	Mt_Medtr7g116340
MergedOrthoGroup001824Sub001		Ct_CtTrNR09866	Dg_DgTrNR00645,Dg_DgTrNR14437	Mt_Medtr4g085990
MergedOrthoGroup001826		Ct_CtTrNR02207	Dg_DgTrNR10130	Mt_Medtr0013s0150,Mt_Medtr3g033620
MergedOrthoGroup001827Sub001		Ct_CtTrNR09451	Dg_DgTrNR00577,Dg_DgTrNR10175	Mt_Medtr7g090740
MergedOrthoGroup001829		Ct_CtTrNR02210	Dg_DgTrNR08612	Mt_Medtr6g016780
MergedOrthoGroup001830		Ct_CtTrNR02211	Dg_DgTrNR00416	Mt_Medtr5g029660
MergedOrthoGroup001832Sub001		Ct_CtTrNR02213	Dg_DgTrNR11860	Mt_Medtr5g022130,Mt_Medtr5g022180,Mt_Medtr5g022210,Mt_Medtr8g075780
MergedOrthoGroup001832Sub002		Ct_CtTrNR05964	Dg_DgTrNR04560	Mt_Medtr7g110410
MergedOrthoGroup001832Sub003		Ct_CtTrNR08215	Dg_DgTrNR02559	Mt_Medtr4g107490
MergedOrthoGroup001833		Ct_CtTrNR02214	Dg_DgTrNR03304	Mt_Medtr1g107430
MergedOrthoGroup001834Sub001		Ct_CtTrNR07334	Dg_DgTrNR03802,Dg_DgTrNR09252,Dg_DgTrNR13279	Mt_Medtr5g097360
MergedOrthoGroup001835Sub001		Ct_CtTrNR02217	Dg_DgTrNR10271	Mt_Medtr2g064840
MergedOrthoGroup001836Sub001		Ct_CtTrNR02218	Dg_DgTrNR09621	Mt_Medtr1g114010
MergedOrthoGroup001836Sub002		Ct_CtTrNR11047,Ct_CtTrNR12364	Dg_DgTrNR07189	Mt_Medtr1g113850,Mt_Medtr4g081940
MergedOrthoGroup001837		Ct_CtTrNR02219	Dg_DgTrNR13476	Mt_Medtr5g021410,Mt_Medtr8g076260
MergedOrthoGroup001839Sub001		Ct_CtTrNR08865	Dg_DgTrNR06345	Mt_Medtr4g107970
MergedOrthoGroup001841		Ct_CtTrNR02223	Dg_DgTrNR04081	Mt_Medtr0001s0430
MergedOrthoGroup001842Sub001		Ct_CtTrNR02224	Dg_DgTrNR04726	Mt_Medtr1g048030,Mt_Medtr7g056733
MergedOrthoGroup001842Sub002		Ct_CtTrNR07728	Dg_DgTrNR06467	Mt_Medtr7g098170
MergedOrthoGroup001842Sub003		Ct_CtTrNR11842	Dg_DgTrNR12297	Mt_Medtr0024s0320,Mt_Medtr7g051430,Mt_Medtr8g011350
MergedOrthoGroup001843		Ct_CtTrNR02225	Dg_DgTrNR04718	Mt_Medtr2g063927,Mt_Medtr2g064000,Mt_Medtr4g125510
MergedOrthoGroup001844		Ct_CtTrNR02226	Dg_DgTrNR15169	Mt_Medtr1g072650,Mt_Medtr7g094490
MergedOrthoGroup001847		Ct_CtTrNR02229	Dg_DgTrNR01760	Mt_Medtr1088s0010,Mt_Medtr1308s0010,Mt_Medtr1372s0010,Mt_Medtr2g450310,Mt_Medtr2g450510
MergedOrthoGroup001852		Ct_CtTrNR02234	Dg_DgTrNR03023	Mt_Medtr4g005340
MergedOrthoGroup001853Sub001		Ct_CtTrNR02235	Dg_DgTrNR11160	Mt_Medtr1g032010,Mt_Medtr1g032300,Mt_Medtr1g032340
MergedOrthoGroup001854		Ct_CtTrNR02236	Dg_DgTrNR00191	Mt_Medtr3g078637
MergedOrthoGroup001855		Ct_CtTrNR02237	Dg_DgTrNR14729,Dg_DgTrNR14730	Mt_Medtr3g072800
MergedOrthoGroup001858		Ct_CtTrNR02240,Ct_CtTrNR05120	Dg_DgTrNR00483	Mt_Medtr3g077720,Mt_Medtr3g077730
MergedOrthoGroup001862		Ct_CtTrNR02246	Dg_DgTrNR12362	Mt_Medtr2g023120
MergedOrthoGroup001864		Ct_CtTrNR02249	Dg_DgTrNR09654	Mt_Medtr3g100500
MergedOrthoGroup001865		Ct_CtTrNR02250	Dg_DgTrNR14810	Mt_Medtr7g118020
MergedOrthoGroup001867		Ct_CtTrNR02252	Dg_DgTrNR11426	Mt_Medtr1g028560,Mt_Medtr3g090760
MergedOrthoGroup001868Sub001		Ct_CtTrNR14508	Dg_DgTrNR06415	Mt_Medtr1g037570,Mt_Medtr4g075120
MergedOrthoGroup001870		Ct_CtTrNR02256,Ct_CtTrNR10316,Ct_CtTrNR14760	Dg_DgTrNR07109	Mt_Medtr2g094020,Mt_Medtr2g094060,Mt_Medtr4g059680
MergedOrthoGroup001873Sub001		Ct_CtTrNR02259	Dg_DgTrNR07122	Mt_Medtr3g111190,Mt_Medtr5g067410
MergedOrthoGroup001874Sub001		Ct_CtTrNR02260	Dg_DgTrNR04576	Mt_Medtr8g032430,Mt_Medtr8g032450,Mt_Medtr8g433000
MergedOrthoGroup001879		Ct_CtTrNR02265	Dg_DgTrNR07455	Mt_Medtr8g075920
MergedOrthoGroup001881		Ct_CtTrNR02268,Ct_CtTrNR14228	Dg_DgTrNR04564	Mt_Medtr4g106730
MergedOrthoGroup001884		Ct_CtTrNR02271	Dg_DgTrNR06979	Mt_Medtr6g005840,Mt_Medtr6g005960
MergedOrthoGroup001887		Ct_CtTrNR02274	Dg_DgTrNR04313	Mt_Medtr7g108390
MergedOrthoGroup001888		Ct_CtTrNR02275	Dg_DgTrNR05538,Dg_DgTrNR06906	Mt_Medtr1g016620
MergedOrthoGroup001890		Ct_CtTrNR02277	Dg_DgTrNR09901	Mt_Medtr3g017490,Mt_Medtr8g038440
MergedOrthoGroup001891		Ct_CtTrNR02278	Dg_DgTrNR02222	Mt_Medtr3g491820
MergedOrthoGroup001892		Ct_CtTrNR02279	Dg_DgTrNR10756	Mt_Medtr1g046950,Mt_Medtr1g047100,Mt_Medtr3g067610,Mt_Medtr5g008695,Mt_Medtr5g008705,Mt_Medtr5g079340
MergedOrthoGroup001894Sub001		Ct_CtTrNR02282	Dg_DgTrNR15224	Mt_Medtr8g061040
MergedOrthoGroup001894Sub002		Ct_CtTrNR04955	Dg_DgTrNR13657	Mt_Medtr2g078520
MergedOrthoGroup001897		Ct_CtTrNR02285	Dg_DgTrNR03144	Mt_Medtr4g055190,Mt_Medtr4g055205,Mt_Medtr4g086170,Mt_Medtr6g005540
MergedOrthoGroup001899Sub001		Ct_CtTrNR02290	Dg_DgTrNR07646	Mt_Medtr3g065190
MergedOrthoGroup001899Sub002		Ct_CtTrNR04760	Dg_DgTrNR07354	Mt_Medtr3g110270
MergedOrthoGroup001899Sub003		Ct_CtTrNR06856	Dg_DgTrNR03317	Mt_Medtr8g005990
MergedOrthoGroup001901		Ct_CtTrNR02293	Dg_DgTrNR10045	Mt_Medtr4g007740
MergedOrthoGroup001903		Ct_CtTrNR02295,Ct_CtTrNR03090,Ct_CtTrNR03091,Ct_CtTrNR03092,Ct_CtTrNR14641	Dg_DgTrNR05040	Mt_Medtr5g076240
MergedOrthoGroup001904Sub001		Ct_CtTrNR02296	Dg_DgTrNR06670	Mt_Medtr1g101945
MergedOrthoGroup001905		Ct_CtTrNR02297	Dg_DgTrNR14528	Mt_Medtr3g111540
MergedOrthoGroup001907		Ct_CtTrNR02300	Dg_DgTrNR11173	Mt_Medtr7g053500,Mt_Medtr8g012400
MergedOrthoGroup001908Sub001		Ct_CtTrNR02301	Dg_DgTrNR11308	Mt_Medtr7g113730
MergedOrthoGroup001909Sub001		Ct_CtTrNR02302	Dg_DgTrNR04607,Dg_DgTrNR04608	Mt_Medtr3g116480,Mt_Medtr4g069920
MergedOrthoGroup001909Sub002		Ct_CtTrNR05568,Ct_CtTrNR05569	Dg_DgTrNR10140	Mt_Medtr8g103233
MergedOrthoGroup001909Sub003		Ct_CtTrNR11443	Dg_DgTrNR12718,Dg_DgTrNR12719	Mt_Medtr3g116500
MergedOrthoGroup001910Sub001		Ct_CtTrNR07672,Ct_CtTrNR12608,Ct_CtTrNR12609	Dg_DgTrNR06739	Mt_Medtr5g040710
MergedOrthoGroup001912		Ct_CtTrNR02308	Dg_DgTrNR12643	Mt_Medtr2g028500,Mt_Medtr3g008570,Mt_Medtr3g057050,Mt_Medtr4g103900,Mt_Medtr5g006060,Mt_Medtr5g015510,Mt_Medtr5g018680,Mt_Medtr5g077700,Mt_Medtr8g078830
MergedOrthoGroup001913		Ct_CtTrNR02309	Dg_DgTrNR08206	Mt_Medtr4g116370
MergedOrthoGroup001914		Ct_CtTrNR02310	Dg_DgTrNR09267	Mt_Medtr2g028900,Mt_Medtr4g083590
MergedOrthoGroup001915		Ct_CtTrNR02311	Dg_DgTrNR10462	Mt_Medtr5g087910
MergedOrthoGroup001916		Ct_CtTrNR02313	Dg_DgTrNR01204,Dg_DgTrNR07826	Mt_Medtr2g076240,Mt_Medtr2g076290,Mt_Medtr2g078440,Mt_Medtr2g078450,Mt_Medtr4g017500
MergedOrthoGroup001918		Ct_CtTrNR02315	Dg_DgTrNR03219,Dg_DgTrNR14111	Mt_Medtr1g083780,Mt_Medtr7g112400,Mt_Medtr7g112403
MergedOrthoGroup001919		Ct_CtTrNR02316	Dg_DgTrNR00730	Mt_Medtr0160s0030,Mt_Medtr4g027440
MergedOrthoGroup001920		Ct_CtTrNR02317	Dg_DgTrNR10558	Mt_Medtr1g050720,Mt_Medtr1g094185
MergedOrthoGroup001921		Ct_CtTrNR02318	Dg_DgTrNR07922	Mt_Medtr4g109330
MergedOrthoGroup001922		Ct_CtTrNR02319	Dg_DgTrNR13276	Mt_Medtr1g077990
MergedOrthoGroup001923		Ct_CtTrNR02320	Dg_DgTrNR14176	Mt_Medtr3g464650,Mt_Medtr3g464700,Mt_Medtr5g071550
MergedOrthoGroup001924Sub001		Ct_CtTrNR02321	Dg_DgTrNR13885	Mt_Medtr5g043480
MergedOrthoGroup001924Sub002		Ct_CtTrNR05707	Dg_DgTrNR04374	Mt_Medtr4g008800,Mt_Medtr4g082640,Mt_Medtr5g043560,Mt_Medtr6g025065,Mt_Medtr8g087680
MergedOrthoGroup001925Sub001		Ct_CtTrNR02322	Dg_DgTrNR12267	Mt_Medtr4g104030
MergedOrthoGroup001925Sub002		Ct_CtTrNR02915	Dg_DgTrNR12174	Mt_Medtr4g104020
MergedOrthoGroup001926Sub001		Ct_CtTrNR02323	Dg_DgTrNR13661	Mt_Medtr2g060820
MergedOrthoGroup001926Sub002		Ct_CtTrNR12179	Dg_DgTrNR08803	Mt_Medtr3g026780,Mt_Medtr7g034345
MergedOrthoGroup001930		Ct_CtTrNR02328	Dg_DgTrNR12673	Mt_Medtr4g014600
MergedOrthoGroup001931		Ct_CtTrNR02329	Dg_DgTrNR03382	Mt_Medtr7g100870
MergedOrthoGroup001932		Ct_CtTrNR02331	Dg_DgTrNR11504	Mt_Medtr4g005880
MergedOrthoGroup001934		Ct_CtTrNR02334	Dg_DgTrNR11318	Mt_Medtr2g097700,Mt_Medtr4g064780
MergedOrthoGroup001936		Ct_CtTrNR02336	Dg_DgTrNR00409	Mt_Medtr1g008350
MergedOrthoGroup001937		Ct_CtTrNR02337	Dg_DgTrNR01503	Mt_Medtr3g103320
MergedOrthoGroup001938		Ct_CtTrNR02338	Dg_DgTrNR06992	Mt_Medtr5g030480
MergedOrthoGroup001939		Ct_CtTrNR02339	Dg_DgTrNR09740,Dg_DgTrNR13258	Mt_Medtr1g085140,Mt_Medtr7g111240
MergedOrthoGroup001942		Ct_CtTrNR02342	Dg_DgTrNR09614,Dg_DgTrNR09775	Mt_Medtr1g069105,Mt_Medtr7g099640
MergedOrthoGroup001943Sub001		Ct_CtTrNR02343	Dg_DgTrNR12164	Mt_Medtr1g026125
MergedOrthoGroup001943Sub002		Ct_CtTrNR03139	Dg_DgTrNR00925	Mt_Medtr7g080250
MergedOrthoGroup001944		Ct_CtTrNR02344	Dg_DgTrNR14513	Mt_Medtr1g019340
MergedOrthoGroup001945		Ct_CtTrNR02345	Dg_DgTrNR10806	Mt_Medtr2g103140,Mt_Medtr4g011320
MergedOrthoGroup001946		Ct_CtTrNR02346,Ct_CtTrNR09333	Dg_DgTrNR10732	Mt_Medtr4g094412
MergedOrthoGroup001950		Ct_CtTrNR02350	Dg_DgTrNR08339	Mt_Medtr1g090787,Mt_Medtr4g069030,Mt_Medtr4g069070
MergedOrthoGroup001954		Ct_CtTrNR02355	Dg_DgTrNR12482	Mt_Medtr1g112640
MergedOrthoGroup001955		Ct_CtTrNR02356	Dg_DgTrNR00016	Mt_Medtr1g087370
MergedOrthoGroup001956		Ct_CtTrNR02357	Dg_DgTrNR04521,Dg_DgTrNR10871	Mt_Medtr1g018420,Mt_Medtr3g102980
MergedOrthoGroup001959		Ct_CtTrNR02360	Dg_DgTrNR09274	Mt_Medtr6g091770
MergedOrthoGroup001960		Ct_CtTrNR02361,Ct_CtTrNR13764	Dg_DgTrNR13905	Mt_Medtr7g086830
MergedOrthoGroup001962		Ct_CtTrNR02363	Dg_DgTrNR08071	Mt_Medtr4g104580,Mt_Medtr7g108240
MergedOrthoGroup001963		Ct_CtTrNR02364	Dg_DgTrNR14877	Mt_Medtr4g081500
MergedOrthoGroup001964		Ct_CtTrNR02365	Dg_DgTrNR04237	Mt_Medtr5g081750,Mt_Medtr7g092840,Mt_Medtr7g092860
MergedOrthoGroup001967		Ct_CtTrNR02368	Dg_DgTrNR01549,Dg_DgTrNR13672	Mt_Medtr1g032730,Mt_Medtr8g105740
MergedOrthoGroup001968		Ct_CtTrNR02369	Dg_DgTrNR03813	Mt_Medtr2g026500,Mt_Medtr2g097750
MergedOrthoGroup001969		Ct_CtTrNR02370	Dg_DgTrNR13948,Dg_DgTrNR13949	Mt_Medtr5g090010
MergedOrthoGroup001970		Ct_CtTrNR02371	Dg_DgTrNR05948	Mt_Medtr1g018480,Mt_Medtr5g099170
MergedOrthoGroup001973		Ct_CtTrNR02374	Dg_DgTrNR11708	Mt_Medtr4g119620
MergedOrthoGroup001974		Ct_CtTrNR02375	Dg_DgTrNR01555	Mt_Medtr3g052260
MergedOrthoGroup001975Sub001		Ct_CtTrNR02376	Dg_DgTrNR12289	Mt_Medtr5g038550
MergedOrthoGroup001977		Ct_CtTrNR02378	Dg_DgTrNR06118	Mt_Medtr7g102780
MergedOrthoGroup001978		Ct_CtTrNR02379	Dg_DgTrNR13204	Mt_Medtr1g031680
MergedOrthoGroup001979		Ct_CtTrNR02380	Dg_DgTrNR02733	Mt_Medtr2g100230
MergedOrthoGroup001981		Ct_CtTrNR02382	Dg_DgTrNR09453	Mt_Medtr2g090765
MergedOrthoGroup001984Sub001		Ct_CtTrNR02385	Dg_DgTrNR14464	Mt_Medtr7g060680
MergedOrthoGroup001985		Ct_CtTrNR02386	Dg_DgTrNR12895	Mt_Medtr1g050425
MergedOrthoGroup001987		Ct_CtTrNR02388	Dg_DgTrNR14677	Mt_Medtr6g066120,Mt_Medtr7g007590,Mt_Medtr7g407120,Mt_Medtr8g006760,Mt_Medtr8g047200
MergedOrthoGroup001988		Ct_CtTrNR02390	Dg_DgTrNR08157	Mt_Medtr1g091040
MergedOrthoGroup001989		Ct_CtTrNR02391	Dg_DgTrNR01346	Mt_Medtr4g087630
MergedOrthoGroup001990		Ct_CtTrNR02392	Dg_DgTrNR11055	Mt_Medtr5g043190
MergedOrthoGroup001992		Ct_CtTrNR02394	Dg_DgTrNR10377	Mt_Medtr1g041435
MergedOrthoGroup001993Sub001		Ct_CtTrNR02396	Dg_DgTrNR13416	Mt_Medtr7g105220
MergedOrthoGroup001995		Ct_CtTrNR02399	Dg_DgTrNR03434,Dg_DgTrNR12474	Mt_Medtr3g054080,Mt_Medtr6g080470
MergedOrthoGroup001998Sub001		Ct_CtTrNR02402	Dg_DgTrNR01312	Mt_Medtr8g088140,Mt_Medtr8g088170
MergedOrthoGroup001998Sub002		Ct_CtTrNR04341,Ct_CtTrNR13275	Dg_DgTrNR12489	Mt_Medtr0018s0090
MergedOrthoGroup001999Sub001		Ct_CtTrNR02403	Dg_DgTrNR13466	Mt_Medtr6g068940
MergedOrthoGroup001999Sub002		Ct_CtTrNR06424	Dg_DgTrNR04071	Mt_Medtr6g068930
MergedOrthoGroup002000		Ct_CtTrNR02404	Dg_DgTrNR05030	Mt_Medtr1g023500
MergedOrthoGroup002002		Ct_CtTrNR02406	Dg_DgTrNR10569	Mt_Medtr1g006490,Mt_Medtr1g006590
MergedOrthoGroup002003Sub001		Ct_CtTrNR02407	Dg_DgTrNR14260	Mt_Medtr6g029200
MergedOrthoGroup002003Sub002		Ct_CtTrNR09735	Dg_DgTrNR04026	Mt_Medtr2g016160
MergedOrthoGroup002012		Ct_CtTrNR02419	Dg_DgTrNR12606	Mt_Medtr8g009500
MergedOrthoGroup002013		Ct_CtTrNR02420,Ct_CtTrNR05869	Dg_DgTrNR12172	Mt_Medtr2g081225,Mt_Medtr2g081230
MergedOrthoGroup002014Sub001		Ct_CtTrNR02423,Ct_CtTrNR13821	Dg_DgTrNR07776,Dg_DgTrNR12679,Dg_DgTrNR12681	Mt_Medtr1g102880,Mt_Medtr4g109230
MergedOrthoGroup002016		Ct_CtTrNR02426	Dg_DgTrNR11726	Mt_Medtr1g080470
MergedOrthoGroup002019		Ct_CtTrNR02429	Dg_DgTrNR14802	Mt_Medtr3g117550
MergedOrthoGroup002020Sub001		Ct_CtTrNR02430	Dg_DgTrNR10914	Mt_Medtr3g077890,Mt_Medtr4g105750
MergedOrthoGroup002021Sub001		Ct_CtTrNR02431	Dg_DgTrNR03593	Mt_Medtr4g116570
MergedOrthoGroup002021Sub002		Ct_CtTrNR14879	Dg_DgTrNR02285	Mt_Medtr1g029710
MergedOrthoGroup002022Sub001		Ct_CtTrNR02432	Dg_DgTrNR08261	Mt_Medtr5g074880
MergedOrthoGroup002023		Ct_CtTrNR02433	Dg_DgTrNR09803	Mt_Medtr1g084610,Mt_Medtr7g111890
MergedOrthoGroup002025		Ct_CtTrNR02436	Dg_DgTrNR00240,Dg_DgTrNR00241,Dg_DgTrNR07990,Dg_DgTrNR07994	Mt_Medtr2g103730,Mt_Medtr4g010650
MergedOrthoGroup002027		Ct_CtTrNR02438	Dg_DgTrNR06125	Mt_Medtr4g102750
MergedOrthoGroup002028		Ct_CtTrNR02439,Ct_CtTrNR04360	Dg_DgTrNR04062	Mt_Medtr3g108040
MergedOrthoGroup002029		Ct_CtTrNR02440	Dg_DgTrNR01564	Mt_Medtr7g052250
MergedOrthoGroup002031		Ct_CtTrNR02443	Dg_DgTrNR11626	Mt_Medtr2g066050,Mt_Medtr4g077370
MergedOrthoGroup002032Sub001		Ct_CtTrNR02444	Dg_DgTrNR03089	Mt_Medtr3g109925,Mt_Medtr8g105970
MergedOrthoGroup002032Sub002		Ct_CtTrNR13874	Dg_DgTrNR06483	Mt_Medtr7g010920
MergedOrthoGroup002034Sub001		Ct_CtTrNR02447	Dg_DgTrNR13579	Mt_Medtr4g100480
MergedOrthoGroup002034Sub002		Ct_CtTrNR12138	Dg_DgTrNR01508	Mt_Medtr4g100500,Mt_Medtr5g013040
MergedOrthoGroup002035		Ct_CtTrNR02448	Dg_DgTrNR05826	Mt_Medtr7g085310
MergedOrthoGroup002036Sub001		Ct_CtTrNR02449	Dg_DgTrNR00550	Mt_Medtr3g069790
MergedOrthoGroup002036Sub002		Ct_CtTrNR07180	Dg_DgTrNR03143	Mt_Medtr2g020040
MergedOrthoGroup002038		Ct_CtTrNR02454	Dg_DgTrNR07597	Mt_Medtr3g088635
MergedOrthoGroup002040Sub001		Ct_CtTrNR02460,Ct_CtTrNR08204	Dg_DgTrNR13072	Mt_Medtr3g034210,Mt_Medtr7g451010,Mt_Medtr8g009510
MergedOrthoGroup002042		Ct_CtTrNR02463,Ct_CtTrNR14763	Dg_DgTrNR08975	Mt_Medtr2g047130,Mt_Medtr8g089260
MergedOrthoGroup002043		Ct_CtTrNR02464	Dg_DgTrNR11565	Mt_Medtr7g076230
MergedOrthoGroup002044		Ct_CtTrNR02465,Ct_CtTrNR08033,Ct_CtTrNR10044,Ct_CtTrNR10045,Ct_CtTrNR10772,Ct_CtTrNR10773	Dg_DgTrNR13439	Mt_Medtr4g019520
MergedOrthoGroup002045Sub001		Ct_CtTrNR02467	Dg_DgTrNR10627	Mt_Medtr3g072030
MergedOrthoGroup002045Sub002		Ct_CtTrNR12512	Dg_DgTrNR09125	Mt_Medtr3g072010
MergedOrthoGroup002047Sub001		Ct_CtTrNR02471	Dg_DgTrNR13266	Mt_Medtr2g460780
MergedOrthoGroup002047Sub002		Ct_CtTrNR10542	Dg_DgTrNR08739	Mt_Medtr4g130880
MergedOrthoGroup002048		Ct_CtTrNR02472	Dg_DgTrNR03490	Mt_Medtr3g103380,Mt_Medtr7g080350
MergedOrthoGroup002049Sub001		Ct_CtTrNR02473	Dg_DgTrNR10868	Mt_Medtr4g114120
MergedOrthoGroup002049Sub002		Ct_CtTrNR14813,Ct_CtTrNR14814	Dg_DgTrNR03211	Mt_Medtr0040s0110,Mt_Medtr8g073315
MergedOrthoGroup002050		Ct_CtTrNR02474	Dg_DgTrNR05732,Dg_DgTrNR09066	Mt_Medtr2g099550,Mt_Medtr8g018780
MergedOrthoGroup002053Sub001		Ct_CtTrNR02477	Dg_DgTrNR07222	Mt_Medtr4g094305
MergedOrthoGroup002054Sub001		Ct_CtTrNR07572	Dg_DgTrNR06033	Mt_Medtr2g104600
MergedOrthoGroup002055		Ct_CtTrNR02479	Dg_DgTrNR12672	Mt_Medtr3g117580
MergedOrthoGroup002056		Ct_CtTrNR02481	Dg_DgTrNR07603,Dg_DgTrNR07606	Mt_Medtr0059s0060
MergedOrthoGroup002057		Ct_CtTrNR02483	Dg_DgTrNR09636	Mt_Medtr4g021780,Mt_Medtr5g097490,Mt_Medtr5g097500
MergedOrthoGroup002058		Ct_CtTrNR02484	Dg_DgTrNR01749	Mt_Medtr6g086510
MergedOrthoGroup002060Sub001		Ct_CtTrNR02487	Dg_DgTrNR15420	Mt_Medtr5g025750
MergedOrthoGroup002062Sub001		Ct_CtTrNR02490	Dg_DgTrNR05679	Mt_Medtr8g028145
MergedOrthoGroup002062Sub002		Ct_CtTrNR08343	Dg_DgTrNR04223	Mt_Medtr3g029520
MergedOrthoGroup002063Sub001		Ct_CtTrNR02491	Dg_DgTrNR11133	Mt_Medtr8g022040
MergedOrthoGroup002065Sub001		Ct_CtTrNR02493	Dg_DgTrNR07837	Mt_Medtr1g069175
MergedOrthoGroup002065Sub002		Ct_CtTrNR08313	Dg_DgTrNR04197	Mt_Medtr7g099450
MergedOrthoGroup002066Sub001		Ct_CtTrNR09426	Dg_DgTrNR00786	Mt_Medtr5g013580
MergedOrthoGroup002066Sub002		Ct_CtTrNR11502	Dg_DgTrNR03180	Mt_Medtr2g089340
MergedOrthoGroup002070Sub001		Ct_CtTrNR02499,Ct_CtTrNR14738,Ct_CtTrNR14821	Dg_DgTrNR08331	Mt_Medtr1g008710,Mt_Medtr4g123110
MergedOrthoGroup002070Sub002		Ct_CtTrNR04213	Dg_DgTrNR03964	Mt_Medtr8g089790
MergedOrthoGroup002072		Ct_CtTrNR02502	Dg_DgTrNR09107	Mt_Medtr3g075230
MergedOrthoGroup002073Sub001		Ct_CtTrNR02503	Dg_DgTrNR11970	Mt_Medtr5g029910
MergedOrthoGroup002073Sub002		Ct_CtTrNR11256	Dg_DgTrNR08513	Mt_Medtr1g095620
MergedOrthoGroup002075		Ct_CtTrNR02505	Dg_DgTrNR13963	Mt_Medtr6g085050
MergedOrthoGroup002076		Ct_CtTrNR02507	Dg_DgTrNR05869	Mt_Medtr1g012990,Mt_Medtr7g069430
MergedOrthoGroup002078		Ct_CtTrNR02509	Dg_DgTrNR04983,Dg_DgTrNR13563	Mt_Medtr3g061590
MergedOrthoGroup002080		Ct_CtTrNR02511	Dg_DgTrNR13180	Mt_Medtr0136s0060,Mt_Medtr7g093500
MergedOrthoGroup002083Sub001		Ct_CtTrNR02515	Dg_DgTrNR08121	Mt_Medtr1g039490
MergedOrthoGroup002083Sub002		Ct_CtTrNR14998	Dg_DgTrNR01992	Mt_Medtr1g050432
MergedOrthoGroup002087		Ct_CtTrNR02519	Dg_DgTrNR14007,Dg_DgTrNR14008	Mt_Medtr4g072090
MergedOrthoGroup002090		Ct_CtTrNR02523	Dg_DgTrNR03035	Mt_Medtr2g035460,Mt_Medtr2g035470,Mt_Medtr2g035480
MergedOrthoGroup002091		Ct_CtTrNR02524	Dg_DgTrNR00726	Mt_Medtr2g005330
MergedOrthoGroup002093		Ct_CtTrNR02526	Dg_DgTrNR06772	Mt_Medtr0018s0260,Mt_Medtr1g492610
MergedOrthoGroup002094Sub001		Ct_CtTrNR02527	Dg_DgTrNR02803	Mt_Medtr0633s0010,Mt_Medtr1g492770,Mt_Medtr2g039530,Mt_Medtr2g044880,Mt_Medtr4g087970,Mt_Medtr4g087980
MergedOrthoGroup002096		Ct_CtTrNR02529	Dg_DgTrNR09155	Mt_Medtr1g022450
MergedOrthoGroup002097Sub001		Ct_CtTrNR02530	Dg_DgTrNR05916	Mt_Medtr3g103050
MergedOrthoGroup002098Sub001		Ct_CtTrNR03551	Dg_DgTrNR13521	Mt_Medtr3g062610,Mt_Medtr5g075680
MergedOrthoGroup002099		Ct_CtTrNR02532	Dg_DgTrNR10309,Dg_DgTrNR10765	Mt_Medtr6g071280
MergedOrthoGroup002100Sub001		Ct_CtTrNR02533	Dg_DgTrNR11416	Mt_Medtr7g108820,Mt_Medtr8g058520
MergedOrthoGroup002100Sub002		Ct_CtTrNR10734	Dg_DgTrNR05049	Mt_Medtr4g074690,Mt_Medtr4g074700,Mt_Medtr4g074710,Mt_Medtr4g074860,Mt_Medtr4g079390
MergedOrthoGroup002101		Ct_CtTrNR02534	Dg_DgTrNR09032	Mt_Medtr2g066110
MergedOrthoGroup002102		Ct_CtTrNR02536	Dg_DgTrNR06138,Dg_DgTrNR08798	Mt_Medtr5g025960
MergedOrthoGroup002103		Ct_CtTrNR02537	Dg_DgTrNR13749	Mt_Medtr7g102990
MergedOrthoGroup002109Sub001		Ct_CtTrNR04000	Dg_DgTrNR15443	Mt_Medtr1g035850,Mt_Medtr2g033460,Mt_Medtr4g101190
MergedOrthoGroup002110		Ct_CtTrNR02547	Dg_DgTrNR08595	Mt_Medtr1g029680,Mt_Medtr3g088585
MergedOrthoGroup002111		Ct_CtTrNR02548	Dg_DgTrNR11425	Mt_Medtr7g093540
MergedOrthoGroup002112Sub001		Ct_CtTrNR02550	Dg_DgTrNR06034	Mt_Medtr4g105680
MergedOrthoGroup002112Sub002		Ct_CtTrNR06267	Dg_DgTrNR04486	Mt_Medtr3g077670
MergedOrthoGroup002113		Ct_CtTrNR02551	Dg_DgTrNR09960	Mt_Medtr1g056390
MergedOrthoGroup002115		Ct_CtTrNR02555,Ct_CtTrNR04139	Dg_DgTrNR08430	Mt_Medtr7g088760
MergedOrthoGroup002119Sub001		Ct_CtTrNR02560	Dg_DgTrNR01966	Mt_Medtr2g034750
MergedOrthoGroup002119Sub002		Ct_CtTrNR06094	Dg_DgTrNR08404	Mt_Medtr4g121470
MergedOrthoGroup002123		Ct_CtTrNR02564	Dg_DgTrNR09187	Mt_Medtr1g054055
MergedOrthoGroup002124		Ct_CtTrNR02565	Dg_DgTrNR11257	Mt_Medtr3g098730
MergedOrthoGroup002125		Ct_CtTrNR02566	Dg_DgTrNR06473	Mt_Medtr4g123573
MergedOrthoGroup002127		Ct_CtTrNR02568	Dg_DgTrNR03361	Mt_Medtr6g086115,Mt_Medtr8g103700
MergedOrthoGroup002128		Ct_CtTrNR02569	Dg_DgTrNR11371	Mt_Medtr8g085480
MergedOrthoGroup002129Sub001		Ct_CtTrNR10138	Dg_DgTrNR10120	Mt_Medtr5g014720
MergedOrthoGroup002130		Ct_CtTrNR02572	Dg_DgTrNR05333	Mt_Medtr4g087270
MergedOrthoGroup002133Sub001		Ct_CtTrNR02576	Dg_DgTrNR06813,Dg_DgTrNR06814	Mt_Medtr5g007050,Mt_Medtr6g046960
MergedOrthoGroup002135		Ct_CtTrNR02579	Dg_DgTrNR01782	Mt_Medtr1g106785,Mt_Medtr5g005170
MergedOrthoGroup002136Sub001		Ct_CtTrNR03315	Dg_DgTrNR09937	Mt_Medtr4g130920
MergedOrthoGroup002136Sub002		Ct_CtTrNR08601	Dg_DgTrNR02184	Mt_Medtr4g130940
MergedOrthoGroup002139Sub001		Ct_CtTrNR02584	Dg_DgTrNR05008	Mt_Medtr1g081420,Mt_Medtr1g081440,Mt_Medtr1g081450,Mt_Medtr1g081550,Mt_Medtr3g005755
MergedOrthoGroup002140		Ct_CtTrNR02585	Dg_DgTrNR14209	Mt_Medtr1g007380,Mt_Medtr3g110660
MergedOrthoGroup002141		Ct_CtTrNR02586	Dg_DgTrNR04483,Dg_DgTrNR04484	Mt_Medtr6g007647
MergedOrthoGroup002142		Ct_CtTrNR02587	Dg_DgTrNR05351	Mt_Medtr7g006040,Mt_Medtr8g064720
MergedOrthoGroup002143		Ct_CtTrNR02588	Dg_DgTrNR03377	Mt_Medtr4g082810,Mt_Medtr4g082820,Mt_Medtr5g043630,Mt_Medtr6g078320
MergedOrthoGroup002144		Ct_CtTrNR02590	Dg_DgTrNR03822	Mt_Medtr7g118160,Mt_Medtr7g118170
MergedOrthoGroup002147		Ct_CtTrNR02593	Dg_DgTrNR02719	Mt_Medtr1g020000
MergedOrthoGroup002149Sub001		Ct_CtTrNR08857	Dg_DgTrNR03079,Dg_DgTrNR03080	Mt_Medtr7g102110
MergedOrthoGroup002151Sub001		Ct_CtTrNR04156	Dg_DgTrNR13930,Dg_DgTrNR13933	Mt_Medtr4g011810
MergedOrthoGroup002151Sub002		Ct_CtTrNR11634	Dg_DgTrNR12497	Mt_Medtr3g082100
MergedOrthoGroup002151Sub003		Ct_CtTrNR12276	Dg_DgTrNR08632	Mt_Medtr1g053955
MergedOrthoGroup002152		Ct_CtTrNR02598	Dg_DgTrNR13766	Mt_Medtr4g127860
MergedOrthoGroup002154Sub001		Ct_CtTrNR02600	Dg_DgTrNR07066	Mt_Medtr0168s0110
MergedOrthoGroup002154Sub002		Ct_CtTrNR05507	Dg_DgTrNR05123,Dg_DgTrNR10839	Mt_Medtr2g436340,Mt_Medtr4g120050
MergedOrthoGroup002155		Ct_CtTrNR02601	Dg_DgTrNR08369	Mt_Medtr2g035070
MergedOrthoGroup002156		Ct_CtTrNR02602	Dg_DgTrNR10275	Mt_Medtr4g102060
MergedOrthoGroup002157Sub001		Ct_CtTrNR02604	Dg_DgTrNR06644	Mt_Medtr1g418545
MergedOrthoGroup002159		Ct_CtTrNR02608,Ct_CtTrNR14332	Dg_DgTrNR03726	Mt_Medtr1g007590,Mt_Medtr3g092100,Mt_Medtr5g065510
MergedOrthoGroup002160Sub001		Ct_CtTrNR02609	Dg_DgTrNR02859	Mt_Medtr3g061090
MergedOrthoGroup002161		Ct_CtTrNR02610	Dg_DgTrNR15128,Dg_DgTrNR15129	Mt_Medtr4g100950,Mt_Medtr5g012590
MergedOrthoGroup002165Sub001		Ct_CtTrNR02615,Ct_CtTrNR14912	Dg_DgTrNR08835	Mt_Medtr5g089970
MergedOrthoGroup002165Sub002		Ct_CtTrNR10953	Dg_DgTrNR05539	Mt_Medtr4g097530
MergedOrthoGroup002166		Ct_CtTrNR02616	Dg_DgTrNR11820,Dg_DgTrNR11821	Mt_Medtr3g080120,Mt_Medtr5g085880
MergedOrthoGroup002172Sub001		Ct_CtTrNR12667	Dg_DgTrNR13602	Mt_Medtr1g031110,Mt_Medtr3g079890,Mt_Medtr3g079970
MergedOrthoGroup002174		Ct_CtTrNR02624	Dg_DgTrNR13082	Mt_Medtr4g077797,Mt_Medtr4g077803
MergedOrthoGroup002177		Ct_CtTrNR02627	Dg_DgTrNR00524	Mt_Medtr8g099090
MergedOrthoGroup002179		Ct_CtTrNR02629	Dg_DgTrNR15248	Mt_Medtr2g031760
MergedOrthoGroup002180Sub001		Ct_CtTrNR02630	Dg_DgTrNR07275	Mt_Medtr4g069800
MergedOrthoGroup002180Sub002		Ct_CtTrNR10464	Dg_DgTrNR09767	Mt_Medtr4g014710
MergedOrthoGroup002181Sub001		Ct_CtTrNR02631	Dg_DgTrNR09100	Mt_Medtr7g082720,Mt_Medtr7g107270
MergedOrthoGroup002182Sub001		Ct_CtTrNR02632	Dg_DgTrNR06187	Mt_Medtr4g087490,Mt_Medtr4g087510,Mt_Medtr4g087520
MergedOrthoGroup002182Sub002		Ct_CtTrNR04473	Dg_DgTrNR12660,Dg_DgTrNR12662	Mt_Medtr3g115670
MergedOrthoGroup002184Sub001		Ct_CtTrNR09832	Dg_DgTrNR00197,Dg_DgTrNR14278	Mt_Medtr3g096610,Mt_Medtr3g115100,Mt_Medtr6g452950
MergedOrthoGroup002184Sub002		Ct_CtTrNR10808	Dg_DgTrNR03121	Mt_Medtr6g086170
MergedOrthoGroup002185		Ct_CtTrNR02635	Dg_DgTrNR03285	Mt_Medtr7g012940
MergedOrthoGroup002187		Ct_CtTrNR02637	Dg_DgTrNR07060	Mt_Medtr5g014410
MergedOrthoGroup002190Sub001		Ct_CtTrNR02640	Dg_DgTrNR14503	Mt_Medtr8g036165
MergedOrthoGroup002191		Ct_CtTrNR02641	Dg_DgTrNR01037,Dg_DgTrNR06263	Mt_Medtr4g095450,Mt_Medtr5g016010
MergedOrthoGroup002195Sub001		Ct_CtTrNR02647	Dg_DgTrNR05612	Mt_Medtr1g095510
MergedOrthoGroup002196		Ct_CtTrNR02648	Dg_DgTrNR08562	Mt_Medtr5g095670
MergedOrthoGroup002197		Ct_CtTrNR02649	Dg_DgTrNR09335,Dg_DgTrNR10084	Mt_Medtr3g037340,Mt_Medtr4g108940,Mt_Medtr4g108950
MergedOrthoGroup002199		Ct_CtTrNR02652	Dg_DgTrNR11848	Mt_Medtr5g030500
MergedOrthoGroup002201		Ct_CtTrNR02654	Dg_DgTrNR15192	Mt_Medtr8g085850
MergedOrthoGroup002204		Ct_CtTrNR02657	Dg_DgTrNR02396	Mt_Medtr4g063905
MergedOrthoGroup002205		Ct_CtTrNR02658	Dg_DgTrNR10657,Dg_DgTrNR14533	Mt_Medtr2g079630,Mt_Medtr2g079650
MergedOrthoGroup002208		Ct_CtTrNR02661	Dg_DgTrNR14292	Mt_Medtr4g014430
MergedOrthoGroup002209		Ct_CtTrNR02662	Dg_DgTrNR11238	Mt_Medtr3g087270,Mt_Medtr3g087275,Mt_Medtr3g087278,Mt_Medtr3g087280,Mt_Medtr3g087300,Mt_Medtr3g087325,Mt_Medtr3g087330
MergedOrthoGroup002210Sub001		Ct_CtTrNR02663	Dg_DgTrNR08453	Mt_Medtr4g131690
MergedOrthoGroup002210Sub002		Ct_CtTrNR10300	Dg_DgTrNR14187	Mt_Medtr2g022560,Mt_Medtr2g022580
MergedOrthoGroup002213		Ct_CtTrNR02668	Dg_DgTrNR07782	Mt_Medtr3g061640
MergedOrthoGroup002214		Ct_CtTrNR02671	Dg_DgTrNR14333,Dg_DgTrNR14334	Mt_Medtr4g022240
MergedOrthoGroup002215		Ct_CtTrNR02673	Dg_DgTrNR07102	Mt_Medtr7g056133
MergedOrthoGroup002216		Ct_CtTrNR02674	Dg_DgTrNR12398	Mt_Medtr4g094235,Mt_Medtr5g070450
MergedOrthoGroup002219Sub001		Ct_CtTrNR02677	Dg_DgTrNR12420	Mt_Medtr3g093970
MergedOrthoGroup002221		Ct_CtTrNR02680	Dg_DgTrNR05865	Mt_Medtr6g069630
MergedOrthoGroup002222		Ct_CtTrNR02682	Dg_DgTrNR12354	Mt_Medtr2g081180,Mt_Medtr4g077420,Mt_Medtr4g077475,Mt_Medtr8g464880
MergedOrthoGroup002224Sub001		Ct_CtTrNR12295	Dg_DgTrNR11599	Mt_Medtr3g072040,Mt_Medtr3g072070,Mt_Medtr5g083740
MergedOrthoGroup002225		Ct_CtTrNR02687	Dg_DgTrNR05953	Mt_Medtr1g071530,Mt_Medtr7g095430
MergedOrthoGroup002226		Ct_CtTrNR02688	Dg_DgTrNR14743	Mt_Medtr5g025590,Mt_Medtr8g072310
MergedOrthoGroup002228		Ct_CtTrNR02691	Dg_DgTrNR13064	Mt_Medtr8g442750
MergedOrthoGroup002229		Ct_CtTrNR02692	Dg_DgTrNR05549	Mt_Medtr3g014200,Mt_Medtr4g092090
MergedOrthoGroup002230		Ct_CtTrNR02693	Dg_DgTrNR04111	Mt_Medtr2g460880
MergedOrthoGroup002231		Ct_CtTrNR02694	Dg_DgTrNR14829	Mt_Medtr7g104360
MergedOrthoGroup002232Sub001		Ct_CtTrNR02695	Dg_DgTrNR09366	Mt_Medtr8g080520
MergedOrthoGroup002232Sub002		Ct_CtTrNR04093,Ct_CtTrNR12660	Dg_DgTrNR08194	Mt_Medtr3g085410,Mt_Medtr3g085420
MergedOrthoGroup002233		Ct_CtTrNR02696	Dg_DgTrNR09086	Mt_Medtr1g115535
MergedOrthoGroup002234		Ct_CtTrNR02697	Dg_DgTrNR05805,Dg_DgTrNR09507	Mt_Medtr7g090450
MergedOrthoGroup002236		Ct_CtTrNR02699	Dg_DgTrNR08282	Mt_Medtr4g052910
MergedOrthoGroup002237Sub001		Ct_CtTrNR02700	Dg_DgTrNR13677	Mt_Medtr8g094610
MergedOrthoGroup002239		Ct_CtTrNR02704	Dg_DgTrNR06540	Mt_Medtr1g022015
MergedOrthoGroup002240		Ct_CtTrNR02705	Dg_DgTrNR13974	Mt_Medtr5g072760
MergedOrthoGroup002241		Ct_CtTrNR02706	Dg_DgTrNR14327	Mt_Medtr4g064110
MergedOrthoGroup002242		Ct_CtTrNR02707	Dg_DgTrNR14163	Mt_Medtr1g086310
MergedOrthoGroup002243		Ct_CtTrNR02708	Dg_DgTrNR02047	Mt_Medtr7g087250
MergedOrthoGroup002244		Ct_CtTrNR02709	Dg_DgTrNR08912,Dg_DgTrNR12322	Mt_Medtr4g020040,Mt_Medtr7g065890
MergedOrthoGroup002246		Ct_CtTrNR02711	Dg_DgTrNR01628	Mt_Medtr7g089550
MergedOrthoGroup002249Sub001		Ct_CtTrNR02715	Dg_DgTrNR11095	Mt_Medtr6g088470
MergedOrthoGroup002249Sub002		Ct_CtTrNR05200	Dg_DgTrNR14291	Mt_Medtr6g088460
MergedOrthoGroup002251		Ct_CtTrNR02717	Dg_DgTrNR00561,Dg_DgTrNR00562	Mt_Medtr4g035350
MergedOrthoGroup002252		Ct_CtTrNR02719	Dg_DgTrNR04402	Mt_Medtr0288s0040
MergedOrthoGroup002255		Ct_CtTrNR02723	Dg_DgTrNR00661	Mt_Medtr1g014690,Mt_Medtr4g036005
[truncated: 4,928 more rows]

## Sheet: Table-S08b
MergedOrthoGroup ID	Gene name	C. thyrsiflorus	D. glomerata	M. truncatula
MergedOrthoGroup000002		non-significant	non-significant	non-significant
MergedOrthoGroup000003		non-significant	nodule-enhanced	root-enhanced
MergedOrthoGroup000004		non-significant	non-significant	nodule-enhanced
MergedOrthoGroup000005Sub001		nodule-enhanced	root-enhanced	non-significant
MergedOrthoGroup000005Sub002		non-significant	non-significant	non-significant
MergedOrthoGroup000005Sub003		non-significant	non-significant	root-enhanced
MergedOrthoGroup000005Sub004		non-significant	non-significant	non-significant
MergedOrthoGroup000005Sub005		non-significant	root-enhanced	nodule-enhanced
MergedOrthoGroup000005Sub006		non-significant	non-significant	non-significant
MergedOrthoGroup000006Sub001		non-significant	non-significant	non-significant
MergedOrthoGroup000007		non-significant	non-significant	nodule-enhanced
MergedOrthoGroup000008		non-significant	nodule-enhanced	root-enhanced
MergedOrthoGroup000010		non-significant	non-significant	non-significant
MergedOrthoGroup000011		non-significant	non-significant	non-significant
MergedOrthoGroup000012Sub001		root-enhanced	nodule-enhanced	non-significant
MergedOrthoGroup000013Sub001		non-significant	non-significant	non-significant
MergedOrthoGroup000014Sub001		non-significant	nodule-enhanced	root-enhanced
MergedOrthoGroup000014Sub002		non-significant	non-significant	non-significant
MergedOrthoGroup000015		non-significant	non-significant	non-significant
MergedOrthoGroup000016		non-significant	non-significant	non-significant
MergedOrthoGroup000017		non-significant	non-significant	non-significant
MergedOrthoGroup000018		non-significant	root-enhanced	root-enhanced
MergedOrthoGroup000019		non-significant	nodule-enhanced	root-enhanced
MergedOrthoGroup000020		non-significant	root-enhanced	root-enhanced
MergedOrthoGroup000021Sub001		non-significant	nodule-enhanced	nodule-enhanced
MergedOrthoGroup000021Sub002		non-significant	non-significant	non-significant
MergedOrthoGroup000021Sub003		non-significant	non-significant	non-significant
MergedOrthoGroup000021Sub004		non-significant	non-significant	non-significant
MergedOrthoGroup000021Sub005		non-significant	non-significant	non-significant
MergedOrthoGroup000021Sub006		non-significant	non-significant	non-significant
MergedOrthoGroup000021Sub007		non-significant	non-significant	non-significant
MergedOrthoGroup000021Sub008		non-significant	non-significant	nodule-enhanced
MergedOrthoGroup000021Sub009		non-significant	non-significant	nodule-enhanced
MergedOrthoGroup000021Sub010		non-significant	non-significant	non-significant
MergedOrthoGroup000021Sub011		non-significant	non-significant	non-significant
MergedOrthoGroup000021Sub012		non-significant	non-significant	non-significant
MergedOrthoGroup000021Sub013		non-significant	non-significant	root-enhanced
MergedOrthoGroup000021Sub014		non-significant	root-enhanced	nodule-enhanced
MergedOrthoGroup000021Sub015		non-significant	root-enhanced	nodule-enhanced
MergedOrthoGroup000021Sub016		non-significant	non-significant	non-significant
MergedOrthoGroup000021Sub017		non-significant	non-significant	non-significant
MergedOrthoGroup000021Sub018		non-significant	non-significant	non-significant
MergedOrthoGroup000021Sub019		non-significant	root-enhanced	non-significant
MergedOrthoGroup000021Sub020		non-significant	non-significant	non-significant
MergedOrthoGroup000021Sub021		non-significant	non-significant	non-significant
MergedOrthoGroup000021Sub022		non-significant	root-enhanced	non-significant
MergedOrthoGroup000021Sub023		non-significant	non-significant	non-significant
MergedOrthoGroup000021Sub024		non-significant	non-significant	non-significant
MergedOrthoGroup000021Sub025		non-significant	nodule-enhanced	non-significant
MergedOrthoGroup000021Sub026		non-significant	root-enhanced	nodule-enhanced
MergedOrthoGroup000021Sub027		non-significant	non-significant	non-significant
MergedOrthoGroup000021Sub028		non-significant	non-significant	non-significant
MergedOrthoGroup000021Sub029		non-significant	non-significant	nodule-enhanced
MergedOrthoGroup000021Sub030		non-significant	non-significant	non-significant
MergedOrthoGroup000021Sub031		non-significant	non-significant	non-significant
MergedOrthoGroup000021Sub032		root-enhanced	non-significant	non-significant
MergedOrthoGroup000021Sub033		non-significant	non-significant	non-significant
MergedOrthoGroup000021Sub034		non-significant	non-significant	non-significant
MergedOrthoGroup000021Sub035		non-significant	non-significant	nodule-enhanced
MergedOrthoGroup000021Sub036		non-significant	non-significant	non-significant
MergedOrthoGroup000021Sub037		root-enhanced	non-significant	root-enhanced
MergedOrthoGroup000021Sub038		non-significant	root-enhanced	non-significant
MergedOrthoGroup000021Sub039		non-significant	non-significant	nodule-enhanced
MergedOrthoGroup000021Sub040		non-significant	nodule-enhanced	non-significant
MergedOrthoGroup000021Sub041		non-significant	non-significant	non-significant
MergedOrthoGroup000021Sub042		non-significant	non-significant	non-significant
MergedOrthoGroup000021Sub043		non-significant	nodule-enhanced	non-significant
MergedOrthoGroup000021Sub044		non-significant	non-significant	non-significant
MergedOrthoGroup000021Sub045		non-significant	nodule-enhanced	root-enhanced
MergedOrthoGroup000021Sub046		non-significant	non-significant	root-enhanced
MergedOrthoGroup000021Sub047		non-significant	nodule-enhanced	non-significant
MergedOrthoGroup000021Sub048		non-significant	non-significant	non-significant
MergedOrthoGroup000021Sub049		non-significant	non-significant	non-significant
MergedOrthoGroup000021Sub050		non-significant	non-significant	non-significant
MergedOrthoGroup000021Sub051		non-significant	non-significant	root-enhanced
MergedOrthoGroup000021Sub052		non-significant	non-significant	nodule-enhanced
MergedOrthoGroup000021Sub053		non-significant	non-significant	non-significant
MergedOrthoGroup000021Sub054		non-significant	nodule-enhanced	nodule-enhanced
MergedOrthoGroup000021Sub055		non-significant	root-enhanced	non-significant
MergedOrthoGroup000021Sub056		non-significant	non-significant	non-significant
MergedOrthoGroup000021Sub057		non-significant	non-significant	non-significant
MergedOrthoGroup000021Sub058		non-significant	non-significant	non-significant
MergedOrthoGroup000021Sub059		non-significant	non-significant	root-enhanced
MergedOrthoGroup000021Sub060		non-significant	non-significant	non-significant
MergedOrthoGroup000021Sub061		non-significant	non-significant	non-significant
MergedOrthoGroup000021Sub062		non-significant	non-significant	non-significant
MergedOrthoGroup000021Sub063		non-significant	non-significant	non-significant
MergedOrthoGroup000021Sub064		non-significant	non-significant	non-significant
MergedOrthoGroup000021Sub065		non-significant	non-significant	non-significant
MergedOrthoGroup000021Sub066		non-significant	non-significant	non-significant
MergedOrthoGroup000021Sub067		non-significant	non-significant	non-significant
MergedOrthoGroup000021Sub068		non-significant	non-significant	non-significant
MergedOrthoGroup000021Sub069		root-enhanced	non-significant	nodule-enhanced
MergedOrthoGroup000021Sub070		non-significant	non-significant	non-significant
MergedOrthoGroup000021Sub071		non-significant	non-significant	non-significant
MergedOrthoGroup000021Sub072		non-significant	non-significant	non-significant
MergedOrthoGroup000021Sub073		nodule-enhanced	non-significant	non-significant
MergedOrthoGroup000021Sub074		non-significant	non-significant	non-significant
MergedOrthoGroup000021Sub075		non-significant	non-significant	non-significant
MergedOrthoGroup000021Sub076		nodule-enhanced	nodule-enhanced	nodule-enhanced
MergedOrthoGroup000021Sub077		non-significant	non-significant	non-significant
MergedOrthoGroup000021Sub078		non-significant	non-significant	root-enhanced
MergedOrthoGroup000021Sub079		non-significant	non-significant	non-significant
MergedOrthoGroup000021Sub080		non-significant	non-significant	non-significant
MergedOrthoGroup000021Sub081		non-significant	non-significant	non-significant
MergedOrthoGroup000021Sub082		non-significant	non-significant	non-significant
MergedOrthoGroup000021Sub083		non-significant	non-significant	non-significant
MergedOrthoGroup000021Sub084		non-significant	non-significant	non-significant
MergedOrthoGroup000021Sub085		non-significant	nodule-enhanced	root-enhanced
MergedOrthoGroup000021Sub086		non-significant	non-significant	non-significant
MergedOrthoGroup000021Sub087		non-significant	nodule-enhanced	non-significant
MergedOrthoGroup000021Sub088		non-significant	nodule-enhanced	non-significant
MergedOrthoGroup000021Sub089		nodule-enhanced	non-significant	nodule-enhanced
MergedOrthoGroup000021Sub090		non-significant	root-enhanced	root-enhanced
MergedOrthoGroup000021Sub091		non-significant	non-significant	non-significant
MergedOrthoGroup000021Sub092		non-significant	non-significant	nodule-enhanced
MergedOrthoGroup000021Sub093		non-significant	non-significant	non-significant
MergedOrthoGroup000021Sub094		non-significant	non-significant	non-significant
MergedOrthoGroup000021Sub095		nodule-enhanced	non-significant	non-significant
MergedOrthoGroup000021Sub096		non-significant	non-significant	non-significant
MergedOrthoGroup000021Sub097		nodule-enhanced	non-significant	non-significant
MergedOrthoGroup000021Sub098		non-significant	root-enhanced	nodule-enhanced
MergedOrthoGroup000021Sub099		non-significant	non-significant	non-significant
MergedOrthoGroup000021Sub100		non-significant	non-significant	non-significant
MergedOrthoGroup000021Sub101		non-significant	non-significant	non-significant
MergedOrthoGroup000021Sub102		non-significant	non-significant	non-significant
MergedOrthoGroup000021Sub103		non-significant	non-significant	non-significant
MergedOrthoGroup000021Sub104		non-significant	non-significant	non-significant
MergedOrthoGroup000021Sub105		non-significant	non-significant	non-significant
MergedOrthoGroup000021Sub106		non-significant	non-significant	non-significant
MergedOrthoGroup000021Sub107		non-significant	non-significant	non-significant
MergedOrthoGroup000021Sub108		non-significant	root-enhanced	root-enhanced
MergedOrthoGroup000021Sub109		non-significant	non-significant	nodule-enhanced
MergedOrthoGroup000021Sub110		non-significant	non-significant	non-significant
MergedOrthoGroup000021Sub111		non-significant	non-significant	non-significant
MergedOrthoGroup000021Sub112		non-significant	non-significant	non-significant
MergedOrthoGroup000021Sub113		non-significant	non-significant	non-significant
MergedOrthoGroup000021Sub114		non-significant	non-significant	nodule-enhanced
MergedOrthoGroup000021Sub115		non-significant	non-significant	non-significant
MergedOrthoGroup000021Sub116		non-significant	non-significant	nodule-enhanced
MergedOrthoGroup000021Sub117		non-significant	non-significant	non-significant
MergedOrthoGroup000021Sub118		non-significant	non-significant	non-significant
MergedOrthoGroup000021Sub119		non-significant	root-enhanced	root-enhanced
MergedOrthoGroup000021Sub120		non-significant	root-enhanced	root-enhanced
MergedOrthoGroup000021Sub121		non-significant	root-enhanced	nodule-enhanced
MergedOrthoGroup000021Sub122		non-significant	non-significant	non-significant
MergedOrthoGroup000021Sub123		non-significant	non-significant	non-significant
MergedOrthoGroup000021Sub124		non-significant	non-significant	non-significant
MergedOrthoGroup000021Sub125		root-enhanced	root-enhanced	root-enhanced
MergedOrthoGroup000021Sub126		non-significant	non-significant	non-significant
MergedOrthoGroup000021Sub127		non-significant	root-enhanced	nodule-enhanced
MergedOrthoGroup000021Sub128		non-significant	nodule-enhanced	non-significant
MergedOrthoGroup000021Sub129		non-significant	non-significant	nodule-enhanced
MergedOrthoGroup000021Sub130		non-significant	root-enhanced	root-enhanced
MergedOrthoGroup000021Sub131		non-significant	root-enhanced	root- and nodule-enhanced
MergedOrthoGroup000021Sub132		non-significant	non-significant	root-enhanced
MergedOrthoGroup000021Sub133		non-significant	non-significant	non-significant
MergedOrthoGroup000021Sub134		non-significant	non-significant	non-significant
MergedOrthoGroup000021Sub135		non-significant	non-significant	non-significant
MergedOrthoGroup000021Sub136		non-significant	non-significant	nodule-enhanced
MergedOrthoGroup000021Sub137		non-significant	non-significant	non-significant
MergedOrthoGroup000021Sub138		non-significant	nodule-enhanced	non-significant
MergedOrthoGroup000021Sub139		non-significant	nodule-enhanced	non-significant
MergedOrthoGroup000021Sub140		nodule-enhanced	root-enhanced	root-enhanced
MergedOrthoGroup000021Sub141		non-significant	non-significant	non-significant
MergedOrthoGroup000021Sub142		non-significant	non-significant	non-significant
MergedOrthoGroup000021Sub143		non-significant	non-significant	non-significant
MergedOrthoGroup000021Sub144		non-significant	nodule-enhanced	non-significant
MergedOrthoGroup000021Sub145		non-significant	nodule-enhanced	non-significant
MergedOrthoGroup000021Sub146		non-significant	non-significant	non-significant
MergedOrthoGroup000021Sub147		root-enhanced	root-enhanced	root-enhanced
MergedOrthoGroup000021Sub148		non-significant	non-significant	non-significant
MergedOrthoGroup000021Sub149		non-significant	non-significant	non-significant
MergedOrthoGroup000021Sub150		non-significant	nodule-enhanced	non-significant
MergedOrthoGroup000021Sub151		non-significant	non-significant	nodule-enhanced
MergedOrthoGroup000021Sub152		non-significant	non-significant	non-significant
MergedOrthoGroup000021Sub153		non-significant	root-enhanced	non-significant
MergedOrthoGroup000021Sub154		non-significant	non-significant	non-significant
MergedOrthoGroup000021Sub155		non-significant	non-significant	non-significant
MergedOrthoGroup000021Sub156		non-significant	non-significant	non-significant
MergedOrthoGroup000021Sub157		non-significant	non-significant	non-significant
MergedOrthoGroup000021Sub158		non-significant	non-significant	non-significant
MergedOrthoGroup000021Sub159		non-significant	nodule-enhanced	non-significant
MergedOrthoGroup000021Sub160		non-significant	non-significant	non-significant
MergedOrthoGroup000021Sub161		non-significant	root-enhanced	non-significant
MergedOrthoGroup000021Sub162		non-significant	non-significant	root-enhanced
MergedOrthoGroup000021Sub163		non-significant	nodule-enhanced	non-significant
MergedOrthoGroup000021Sub164		non-significant	non-significant	non-significant
MergedOrthoGroup000021Sub165		non-significant	non-significant	non-significant
MergedOrthoGroup000021Sub166		non-significant	non-significant	non-significant
MergedOrthoGroup000021Sub167		non-significant	non-significant	non-significant
MergedOrthoGroup000021Sub168		non-significant	root-enhanced	root-enhanced
MergedOrthoGroup000021Sub169		non-significant	non-significant	non-significant
MergedOrthoGroup000021Sub170		non-significant	non-significant	non-significant
MergedOrthoGroup000021Sub171		non-significant	non-significant	nodule-enhanced
MergedOrthoGroup000021Sub172		non-significant	non-significant	root-enhanced
MergedOrthoGroup000021Sub173		non-significant	non-significant	non-significant
MergedOrthoGroup000021Sub174		non-significant	non-significant	non-significant
MergedOrthoGroup000021Sub175		non-significant	non-significant	non-significant
MergedOrthoGroup000021Sub176		non-significant	root-enhanced	non-significant
MergedOrthoGroup000021Sub177		non-significant	non-significant	non-significant
MergedOrthoGroup000021Sub178		non-significant	non-significant	non-significant
MergedOrthoGroup000021Sub179		non-significant	root-enhanced	root-enhanced
MergedOrthoGroup000021Sub180		root-enhanced	non-significant	nodule-enhanced
MergedOrthoGroup000021Sub181		non-significant	root- and nodule-enhanced	root-enhanced
MergedOrthoGroup000021Sub182		non-significant	root-enhanced	non-significant
MergedOrthoGroup000021Sub183		non-significant	non-significant	non-significant
MergedOrthoGroup000021Sub184		non-significant	non-significant	non-significant
MergedOrthoGroup000021Sub185		non-significant	root-enhanced	root- and nodule-enhanced
MergedOrthoGroup000021Sub186		non-significant	root- and nodule-enhanced	root-enhanced
MergedOrthoGroup000021Sub187		nodule-enhanced	non-significant	nodule-enhanced
MergedOrthoGroup000021Sub188		nodule-enhanced	nodule-enhanced	nodule-enhanced
MergedOrthoGroup000021Sub189		non-significant	nodule-enhanced	non-significant
MergedOrthoGroup000021Sub190		non-significant	non-significant	non-significant
MergedOrthoGroup000021Sub191		non-significant	non-significant	non-significant
MergedOrthoGroup000021Sub192		non-significant	non-significant	non-significant
MergedOrthoGroup000021Sub193		non-significant	non-significant	non-significant
MergedOrthoGroup000021Sub194		non-significant	non-significant	root-enhanced
MergedOrthoGroup000021Sub195		non-significant	non-significant	non-significant
MergedOrthoGroup000021Sub196		non-significant	non-significant	non-significant
MergedOrthoGroup000021Sub197		root-enhanced	non-significant	non-significant
MergedOrthoGroup000021Sub198		non-significant	non-significant	root-enhanced
MergedOrthoGroup000021Sub199		non-significant	non-significant	non-significant
MergedOrthoGroup000021Sub200		non-significant	non-significant	non-significant
MergedOrthoGroup000021Sub201		root-enhanced	non-significant	root-enhanced
MergedOrthoGroup000021Sub202		non-significant	non-significant	non-significant
MergedOrthoGroup000021Sub203		non-significant	non-significant	non-significant
MergedOrthoGroup000021Sub204		non-significant	non-significant	non-significant
MergedOrthoGroup000021Sub205		non-significant	non-significant	non-significant
MergedOrthoGroup000021Sub206		non-significant	non-significant	non-significant
MergedOrthoGroup000021Sub207		non-significant	non-significant	non-significant
MergedOrthoGroup000021Sub208		non-significant	non-significant	non-significant
MergedOrthoGroup000021Sub209		non-significant	non-significant	non-significant
MergedOrthoGroup000021Sub210		non-significant	non-significant	non-significant
MergedOrthoGroup000021Sub211		nodule-enhanced	nodule-enhanced	non-significant
MergedOrthoGroup000021Sub212		non-significant	root-enhanced	non-significant
MergedOrthoGroup000021Sub213		non-significant	non-significant	non-significant
MergedOrthoGroup000021Sub214		non-significant	non-significant	non-significant
MergedOrthoGroup000021Sub215		non-significant	non-significant	non-significant
MergedOrthoGroup000021Sub216		non-significant	non-significant	root-enhanced
MergedOrthoGroup000021Sub217		non-significant	non-significant	non-significant
MergedOrthoGroup000021Sub218		root-enhanced	non-significant	nodule-enhanced
MergedOrthoGroup000021Sub219		non-significant	non-significant	non-significant
MergedOrthoGroup000021Sub220		non-significant	non-significant	non-significant
MergedOrthoGroup000021Sub221		non-significant	non-significant	non-significant
MergedOrthoGroup000021Sub222		non-significant	non-significant	non-significant
MergedOrthoGroup000021Sub223		non-significant	non-significant	non-significant
MergedOrthoGroup000021Sub224		non-significant	non-significant	non-significant
MergedOrthoGroup000021Sub225		non-significant	non-significant	non-significant
MergedOrthoGroup000021Sub226		non-significant	non-significant	non-significant
MergedOrthoGroup000021Sub227		non-significant	non-significant	nodule-enhanced
MergedOrthoGroup000021Sub228		non-significant	non-significant	nodule-enhanced
MergedOrthoGroup000021Sub229		non-significant	non-significant	non-significant
MergedOrthoGroup000021Sub230		non-significant	non-significant	non-significant
MergedOrthoGroup000021Sub231		non-significant	non-significant	non-significant
MergedOrthoGroup000021Sub232		non-significant	non-significant	non-significant
MergedOrthoGroup000021Sub233		non-significant	non-significant	non-significant
MergedOrthoGroup000021Sub234		nodule-enhanced	non-significant	non-significant
MergedOrthoGroup000021Sub235		non-significant	root-enhanced	non-significant
MergedOrthoGroup000021Sub236		non-significant	non-significant	non-significant
MergedOrthoGroup000021Sub237		non-significant	non-significant	non-significant
MergedOrthoGroup000021Sub238		non-significant	non-significant	root-enhanced
MergedOrthoGroup000021Sub239		non-significant	nodule-enhanced	non-significant
MergedOrthoGroup000021Sub240		nodule-enhanced	non-significant	root-enhanced
MergedOrthoGroup000021Sub241		non-significant	non-significant	non-significant
MergedOrthoGroup000021Sub242		root-enhanced	root-enhanced	root-enhanced
MergedOrthoGroup000021Sub243		non-significant	root-enhanced	non-significant
MergedOrthoGroup000021Sub244		non-significant	non-significant	nodule-enhanced
MergedOrthoGroup000021Sub245		non-significant	non-significant	root-enhanced
MergedOrthoGroup000021Sub246		non-significant	non-significant	non-significant
MergedOrthoGroup000021Sub247		nodule-enhanced	non-significant	nodule-enhanced
MergedOrthoGroup000021Sub248		non-significant	nodule-enhanced	non-significant
MergedOrthoGroup000021Sub249		non-significant	non-significant	nodule-enhanced
MergedOrthoGroup000021Sub250		non-significant	non-significant	nodule-enhanced
MergedOrthoGroup000021Sub251		non-significant	non-significant	non-significant
MergedOrthoGroup000021Sub252		non-significant	nodule-enhanced	nodule-enhanced
MergedOrthoGroup000021Sub253		non-significant	non-significant	non-significant
MergedOrthoGroup000021Sub254		non-significant	non-significant	non-significant
MergedOrthoGroup000021Sub255		non-significant	non-significant	non-significant
MergedOrthoGroup000021Sub256		non-significant	non-significant	non-significant
MergedOrthoGroup000021Sub257		non-significant	non-significant	non-significant
MergedOrthoGroup000021Sub258		non-significant	non-significant	non-significant
MergedOrthoGroup000021Sub259		non-significant	non-significant	non-significant
MergedOrthoGroup000021Sub260		root-enhanced	root-enhanced	non-significant
MergedOrthoGroup000021Sub261		non-significant	non-significant	non-significant
MergedOrthoGroup000021Sub262		non-significant	nodule-enhanced	nodule-enhanced
MergedOrthoGroup000021Sub263		non-significant	root-enhanced	nodule-enhanced
MergedOrthoGroup000021Sub264		non-significant	non-significant	non-significant
MergedOrthoGroup000021Sub265		non-significant	root-enhanced	non-significant
MergedOrthoGroup000021Sub266		non-significant	non-significant	nodule-enhanced
MergedOrthoGroup000021Sub267		non-significant	non-significant	non-significant
MergedOrthoGroup000021Sub268		non-significant	non-significant	non-significant
MergedOrthoGroup000021Sub269		non-significant	root- and nodule-enhanced	non-significant
MergedOrthoGroup000021Sub270		non-significant	nodule-enhanced	non-significant
MergedOrthoGroup000021Sub271		non-significant	nodule-enhanced	root-enhanced
MergedOrthoGroup000021Sub272		non-significant	nodule-enhanced	root-enhanced
MergedOrthoGroup000021Sub273		non-significant	non-significant	non-significant
MergedOrthoGroup000021Sub274		non-significant	non-significant	nodule-enhanced
MergedOrthoGroup000021Sub275		non-significant	non-significant	nodule-enhanced
MergedOrthoGroup000021Sub276		non-significant	nodule-enhanced	non-significant
MergedOrthoGroup000021Sub277		nodule-enhanced	nodule-enhanced	nodule-enhanced
MergedOrthoGroup000021Sub278		non-significant	non-significant	nodule-enhanced
MergedOrthoGroup000021Sub279		non-significant	root-enhanced	root-enhanced
MergedOrthoGroup000021Sub280		non-significant	nodule-enhanced	non-significant
MergedOrthoGroup000021Sub281		non-significant	non-significant	nodule-enhanced
MergedOrthoGroup000021Sub282		non-significant	non-significant	non-significant
MergedOrthoGroup000021Sub283		non-significant	nodule-enhanced	non-significant
MergedOrthoGroup000021Sub284		non-significant	root-enhanced	non-significant
MergedOrthoGroup000021Sub285		non-significant	non-significant	nodule-enhanced
MergedOrthoGroup000021Sub286		non-significant	non-significant	root-enhanced
MergedOrthoGroup000021Sub287		non-significant	non-significant	root-enhanced
MergedOrthoGroup000021Sub288		non-significant	non-significant	non-significant
MergedOrthoGroup000021Sub289		nodule-enhanced	root- and nodule-enhanced	non-significant
MergedOrthoGroup000021Sub290		non-significant	root-enhanced	root- and nodule-enhanced
MergedOrthoGroup000021Sub291		nodule-enhanced	non-significant	nodule-enhanced
MergedOrthoGroup000021Sub292		non-significant	non-significant	non-significant
MergedOrthoGroup000021Sub293		nodule-enhanced	nodule-enhanced	root-enhanced
MergedOrthoGroup000021Sub294		nodule-enhanced	non-significant	non-significant
MergedOrthoGroup000021Sub295		non-significant	non-significant	non-significant
MergedOrthoGroup000021Sub296		non-significant	non-significant	nodule-enhanced
MergedOrthoGroup000021Sub297		non-significant	non-significant	root-enhanced
MergedOrthoGroup000021Sub298		non-significant	non-significant	non-significant
MergedOrthoGroup000021Sub299		non-significant	non-significant	non-significant
MergedOrthoGroup000021Sub300		non-significant	non-significant	non-significant
MergedOrthoGroup000021Sub301		non-significant	non-significant	nodule-enhanced
MergedOrthoGroup000021Sub302		non-significant	non-significant	nodule-enhanced
MergedOrthoGroup000021Sub303		root- and nodule-enhanced	non-significant	nodule-enhanced
MergedOrthoGroup000021Sub304		nodule-enhanced	root-enhanced	nodule-enhanced
MergedOrthoGroup000021Sub305		non-significant	non-significant	non-significant
MergedOrthoGroup000021Sub306		non-significant	non-significant	non-significant
MergedOrthoGroup000021Sub307		non-significant	non-significant	non-significant
MergedOrthoGroup000021Sub308		non-significant	non-significant	non-significant
MergedOrthoGroup000021Sub309		non-significant	root-enhanced	nodule-enhanced
MergedOrthoGroup000021Sub310		non-significant	nodule-enhanced	root-enhanced
MergedOrthoGroup000021Sub311		non-significant	nodule-enhanced	non-significant
MergedOrthoGroup000021Sub312		non-significant	non-significant	non-significant
MergedOrthoGroup000021Sub313		non-significant	non-significant	non-significant
MergedOrthoGroup000021Sub314		non-significant	non-significant	non-significant
MergedOrthoGroup000021Sub315		non-significant	non-significant	non-significant
MergedOrthoGroup000021Sub316		non-significant	non-significant	non-significant
MergedOrthoGroup000021Sub317		non-significant	non-significant	non-significant
MergedOrthoGroup000021Sub318		non-significant	non-significant	root-enhanced
MergedOrthoGroup000021Sub319		non-significant	non-significant	non-significant
MergedOrthoGroup000021Sub320		non-significant	non-significant	non-significant
MergedOrthoGroup000021Sub321		non-significant	non-significant	nodule-enhanced
MergedOrthoGroup000021Sub322		non-significant	non-significant	root-enhanced
MergedOrthoGroup000021Sub323		non-significant	non-significant	root-enhanced
MergedOrthoGroup000021Sub324		non-significant	non-significant	non-significant
MergedOrthoGroup000021Sub325		non-significant	non-significant	non-significant
MergedOrthoGroup000021Sub326		non-significant	nodule-enhanced	root-enhanced
MergedOrthoGroup000021Sub327		non-significant	non-significant	root-enhanced
MergedOrthoGroup000021Sub328		non-significant	non-significant	non-significant
MergedOrthoGroup000021Sub329		non-significant	root-enhanced	non-significant
MergedOrthoGroup000021Sub330		non-significant	nodule-enhanced	non-significant
MergedOrthoGroup000021Sub331		non-significant	non-significant	non-significant
MergedOrthoGroup000021Sub332		non-significant	non-significant	non-significant
MergedOrthoGroup000021Sub333		non-significant	non-significant	non-significant
MergedOrthoGroup000021Sub334		non-significant	nodule-enhanced	non-significant
MergedOrthoGroup000021Sub335		non-significant	non-significant	non-significant
MergedOrthoGroup000021Sub336		non-significant	root-enhanced	root-enhanced
MergedOrthoGroup000021Sub337		non-significant	nodule-enhanced	non-significant
MergedOrthoGroup000021Sub338		non-significant	non-significant	non-significant
MergedOrthoGroup000021Sub339		root-enhanced	root-enhanced	root- and nodule-enhanced
MergedOrthoGroup000021Sub340		non-significant	non-significant	non-significant
MergedOrthoGroup000021Sub341		non-significant	root-enhanced	root-enhanced
MergedOrthoGroup000021Sub342		non-significant	non-significant	non-significant
MergedOrthoGroup000021Sub343		non-significant	non-significant	nodule-enhanced
MergedOrthoGroup000021Sub344		non-significant	non-significant	non-significant
MergedOrthoGroup000021Sub345		non-significant	non-significant	non-significant
MergedOrthoGroup000021Sub346		non-significant	nodule-enhanced	non-significant
MergedOrthoGroup000021Sub347		non-significant	non-significant	non-significant
MergedOrthoGroup000021Sub348		non-significant	nodule-enhanced	non-significant
MergedOrthoGroup000021Sub349		non-significant	non-significant	root-enhanced
MergedOrthoGroup000021Sub350		non-significant	non-significant	non-significant
MergedOrthoGroup000021Sub351		non-significant	root-enhanced	root-enhanced
MergedOrthoGroup000021Sub352		non-significant	non-significant	non-significant
MergedOrthoGroup000021Sub353		non-significant	non-significant	non-significant
MergedOrthoGroup000021Sub354		non-significant	non-significant	non-significant
MergedOrthoGroup000021Sub355		non-significant	non-significant	non-significant
MergedOrthoGroup000021Sub356		non-significant	nodule-enhanced	non-significant
MergedOrthoGroup000021Sub357		non-significant	non-significant	non-significant
MergedOrthoGroup000021Sub358		non-significant	non-significant	non-significant
MergedOrthoGroup000021Sub359		non-significant	non-significant	non-significant
MergedOrthoGroup000021Sub360		non-significant	non-significant	non-significant
MergedOrthoGroup000021Sub361		non-significant	non-significant	non-significant
MergedOrthoGroup000021Sub362		non-significant	non-significant	non-significant
MergedOrthoGroup000021Sub363		non-significant	non-significant	non-significant
MergedOrthoGroup000021Sub364		non-significant	non-significant	non-significant
MergedOrthoGroup000021Sub365		non-significant	non-significant	non-significant
MergedOrthoGroup000021Sub366		non-significant	non-significant	non-significant
MergedOrthoGroup000021Sub367		non-significant	non-significant	nodule-enhanced
MergedOrthoGroup000021Sub368		non-significant	non-significant	root-enhanced
MergedOrthoGroup000021Sub369		non-significant	root-enhanced	root-enhanced
MergedOrthoGroup000021Sub370		non-significant	non-significant	non-significant
MergedOrthoGroup000021Sub371		non-significant	non-significant	non-significant
MergedOrthoGroup000021Sub372		non-significant	non-significant	non-significant
MergedOrthoGroup000021Sub373		root-enhanced	non-significant	non-significant
MergedOrthoGroup000021Sub374		non-significant	non-significant	non-significant
MergedOrthoGroup000021Sub375		non-significant	non-significant	non-significant
MergedOrthoGroup000021Sub376		non-significant	non-significant	non-significant
MergedOrthoGroup000021Sub377		non-significant	non-significant	non-significant
MergedOrthoGroup000021Sub378		non-significant	non-significant	non-significant
MergedOrthoGroup000021Sub379		non-significant	non-significant	nodule-enhanced
MergedOrthoGroup000021Sub380		non-significant	nodule-enhanced	root- and nodule-enhanced
MergedOrthoGroup000021Sub381		non-significant	nodule-enhanced	non-significant
MergedOrthoGroup000021Sub382		non-significant	non-significant	root-enhanced
MergedOrthoGroup000021Sub383		non-significant	non-significant	non-significant
MergedOrthoGroup000021Sub384		non-significant	non-significant	non-significant
MergedOrthoGroup000021Sub385		non-significant	non-significant	non-significant
MergedOrthoGroup000021Sub386		non-significant	non-significant	non-significant
MergedOrthoGroup000021Sub387		non-significant	non-significant	non-significant
MergedOrthoGroup000021Sub388		non-significant	root-enhanced	non-significant
MergedOrthoGroup000030Sub001		non-significant	non-significant	nodule-enhanced
MergedOrthoGroup000031		non-significant	root-enhanced	root-enhanced
MergedOrthoGroup000034		non-significant	nodule-enhanced	non-significant
MergedOrthoGroup000036		non-significant	root-enhanced	root- and nodule-enhanced
MergedOrthoGroup000037		non-significant	non-significant	non-significant
MergedOrthoGroup000042		non-significant	non-significant	nodule-enhanced
MergedOrthoGroup000045Sub001		non-significant	nodule-enhanced	root-enhanced
MergedOrthoGroup000046		non-significant	non-significant	non-significant
MergedOrthoGroup000052		non-significant	root-enhanced	root- and nodule-enhanced
MergedOrthoGroup000055Sub001		non-significant	non-significant	non-significant
MergedOrthoGroup000055Sub002		non-significant	root-enhanced	nodule-enhanced
MergedOrthoGroup000055Sub003		non-significant	non-significant	non-significant
MergedOrthoGroup000057		non-significant	non-significant	root- and nodule-enhanced
MergedOrthoGroup000058		non-significant	non-significant	root-enhanced
MergedOrthoGroup000059		non-significant	non-significant	non-significant
MergedOrthoGroup000060		non-significant	root-enhanced	root- and nodule-enhanced
MergedOrthoGroup000061Sub001		non-significant	non-significant	non-significant
MergedOrthoGroup000063Sub001		non-significant	non-significant	non-significant
MergedOrthoGroup000063Sub002		non-significant	non-significant	non-significant
MergedOrthoGroup000065		non-significant	root-enhanced	root-enhanced
MergedOrthoGroup000066		non-significant	non-significant	nodule-enhanced
MergedOrthoGroup000067		non-significant	root-enhanced	root-enhanced
MergedOrthoGroup000068		non-significant	non-significant	nodule-enhanced
MergedOrthoGroup000070		root-enhanced	root-enhanced	nodule-enhanced
MergedOrthoGroup000071Sub001		non-significant	root-enhanced	nodule-enhanced
MergedOrthoGroup000071Sub002		non-significant	root-enhanced	root-enhanced
MergedOrthoGroup000071Sub003		non-significant	non-significant	non-significant
MergedOrthoGroup000071Sub004		root-enhanced	non-significant	non-significant
MergedOrthoGroup000072		non-significant	non-significant	non-significant
MergedOrthoGroup000073Sub001		non-significant	non-significant	non-significant
MergedOrthoGroup000076		non-significant	nodule-enhanced	non-significant
MergedOrthoGroup000077		non-significant	nodule-enhanced	non-significant
MergedOrthoGroup000089		non-significant	non-significant	non-significant
MergedOrthoGroup000090	NSP2	non-significant	root-enhanced	root-enhanced
MergedOrthoGroup000092Sub001		non-significant	root-enhanced	nodule-enhanced
MergedOrthoGroup000092Sub002		non-significant	root-enhanced	non-significant
MergedOrthoGroup000093Sub001		non-significant	non-significant	root-enhanced
MergedOrthoGroup000097Sub001		non-significant	non-significant	root-enhanced
MergedOrthoGroup000097Sub002		non-significant	non-significant	non-significant
MergedOrthoGroup000101		non-significant	non-significant	non-significant
MergedOrthoGroup000103		nodule-enhanced	nodule-enhanced	non-significant
MergedOrthoGroup000105		non-significant	nodule-enhanced	nodule-enhanced
MergedOrthoGroup000106		non-significant	non-significant	root-enhanced
MergedOrthoGroup000113		non-significant	non-significant	non-significant
MergedOrthoGroup000115		non-significant	non-significant	nodule-enhanced
MergedOrthoGroup000117		non-significant	nodule-enhanced	nodule-enhanced
MergedOrthoGroup000119Sub001		non-significant	root-enhanced	non-significant
MergedOrthoGroup000120		non-significant	non-significant	root-enhanced
MergedOrthoGroup000121Sub001		non-significant	root-enhanced	non-significant
MergedOrthoGroup000121Sub002		non-significant	non-significant	non-significant
MergedOrthoGroup000122		non-significant	non-significant	nodule-enhanced
MergedOrthoGroup000127Sub001		non-significant	nodule-enhanced	root-enhanced
MergedOrthoGroup000127Sub002		non-significant	non-significant	non-significant
MergedOrthoGroup000128		non-significant	non-significant	root-enhanced
MergedOrthoGroup000129		non-significant	non-significant	non-significant
MergedOrthoGroup000131Sub001		non-significant	non-significant	non-significant
MergedOrthoGroup000131Sub002		non-significant	non-significant	nodule-enhanced
MergedOrthoGroup000132		non-significant	non-significant	non-significant
MergedOrthoGroup000133		non-significant	non-significant	nodule-enhanced
MergedOrthoGroup000134		non-significant	nodule-enhanced	nodule-enhanced
MergedOrthoGroup000135		non-significant	non-significant	non-significant
MergedOrthoGroup000140		non-significant	non-significant	non-significant
MergedOrthoGroup000144		non-significant	non-significant	non-significant
MergedOrthoGroup000145		non-significant	root-enhanced	root-enhanced
MergedOrthoGroup000146Sub001		non-significant	non-significant	non-significant
MergedOrthoGroup000150Sub001		non-significant	root-enhanced	non-significant
MergedOrthoGroup000154Sub001		non-significant	non-significant	non-significant
MergedOrthoGroup000154Sub002		non-significant	root-enhanced	root-enhanced
MergedOrthoGroup000154Sub003		non-significant	nodule-enhanced	non-significant
MergedOrthoGroup000158		non-significant	non-significant	non-significant
MergedOrthoGroup000159		non-significant	non-significant	non-significant
MergedOrthoGroup000164		non-significant	root-enhanced	non-significant
MergedOrthoGroup000165		non-significant	non-significant	nodule-enhanced
MergedOrthoGroup000166		non-significant	nodule-enhanced	nodule-enhanced
MergedOrthoGroup000167Sub001		non-significant	non-significant	non-significant
MergedOrthoGroup000167Sub002		non-significant	non-significant	non-significant
MergedOrthoGroup000168		non-significant	non-significant	non-significant
MergedOrthoGroup000169		non-significant	nodule-enhanced	nodule-enhanced
MergedOrthoGroup000170		non-significant	root-enhanced	nodule-enhanced
MergedOrthoGroup000173		non-significant	root-enhanced	root-enhanced
MergedOrthoGroup000175Sub001		non-significant	non-significant	root- and nodule-enhanced
MergedOrthoGroup000178		non-significant	root-enhanced	non-significant
MergedOrthoGroup000179		non-significant	non-significant	non-significant
MergedOrthoGroup000180		non-significant	non-significant	nodule-enhanced
MergedOrthoGroup000181Sub001		nodule-enhanced	root-enhanced	non-significant
MergedOrthoGroup000181Sub002		non-significant	non-significant	non-significant
MergedOrthoGroup000182		non-significant	root-enhanced	nodule-enhanced
MergedOrthoGroup000184Sub001		non-significant	non-significant	non-significant
MergedOrthoGroup000187Sub001		root-enhanced	root-enhanced	non-significant
MergedOrthoGroup000188Sub001		non-significant	non-significant	non-significant
MergedOrthoGroup000188Sub002		non-significant	non-significant	nodule-enhanced
MergedOrthoGroup000189		non-significant	non-significant	non-significant
MergedOrthoGroup000190Sub001		non-significant	root-enhanced	non-significant
MergedOrthoGroup000190Sub002		non-significant	non-significant	non-significant
MergedOrthoGroup000191		non-significant	non-significant	non-significant
MergedOrthoGroup000193Sub001		non-significant	non-significant	non-significant
MergedOrthoGroup000194		non-significant	root-enhanced	nodule-enhanced
MergedOrthoGroup000195		non-significant	non-significant	non-significant
MergedOrthoGroup000198Sub001		non-significant	non-significant	non-significant
MergedOrthoGroup000199Sub001		non-significant	root-enhanced	nodule-enhanced
MergedOrthoGroup000199Sub002		non-significant	nodule-enhanced	non-significant
MergedOrthoGroup000199Sub003		non-significant	non-significant	non-significant
MergedOrthoGroup000200		non-significant	non-significant	root-enhanced
MergedOrthoGroup000206Sub001		root-enhanced	non-significant	root-enhanced
MergedOrthoGroup000207Sub001		non-significant	non-significant	non-significant
MergedOrthoGroup000208		non-significant	root-enhanced	non-significant
MergedOrthoGroup000210		non-significant	non-significant	non-significant
MergedOrthoGroup000216		non-significant	non-significant	non-significant
MergedOrthoGroup000217		non-significant	non-significant	non-significant
MergedOrthoGroup000218		non-significant	root-enhanced	non-significant
MergedOrthoGroup000219		non-significant	non-significant	nodule-enhanced
MergedOrthoGroup000220Sub001		non-significant	non-significant	non-significant
MergedOrthoGroup000220Sub002		non-significant	non-significant	root-enhanced
MergedOrthoGroup000226Sub001		non-significant	non-significant	nodule-enhanced
MergedOrthoGroup000227		non-significant	non-significant	nodule-enhanced
MergedOrthoGroup000229		root-enhanced	nodule-enhanced	root-enhanced
MergedOrthoGroup000230		non-significant	root-enhanced	non-significant
MergedOrthoGroup000231		non-significant	non-significant	nodule-enhanced
MergedOrthoGroup000232Sub001		non-significant	non-significant	non-significant
MergedOrthoGroup000233		non-significant	non-significant	non-significant
MergedOrthoGroup000234		non-significant	nodule-enhanced	root-enhanced
MergedOrthoGroup000235		non-significant	non-significant	non-significant
MergedOrthoGroup000236Sub001		non-significant	non-significant	nodule-enhanced
MergedOrthoGroup000236Sub002		non-significant	non-significant	non-significant
MergedOrthoGroup000238		non-significant	non-significant	non-significant
MergedOrthoGroup000242Sub001		non-significant	non-significant	non-significant
MergedOrthoGroup000243		non-significant	root-enhanced	non-significant
MergedOrthoGroup000244		non-significant	non-significant	non-significant
MergedOrthoGroup000246		non-significant	root-enhanced	nodule-enhanced
MergedOrthoGroup000248		non-significant	root-enhanced	non-significant
MergedOrthoGroup000250		non-significant	nodule-enhanced	non-significant
MergedOrthoGroup000252		non-significant	nodule-enhanced	root-enhanced
MergedOrthoGroup000254Sub001		non-significant	nodule-enhanced	root-enhanced
MergedOrthoGroup000256		non-significant	non-significant	non-significant
MergedOrthoGroup000258Sub001		non-significant	non-significant	root-enhanced
MergedOrthoGroup000258Sub002		non-significant	non-significant	non-significant
MergedOrthoGroup000260Sub001		non-significant	non-significant	non-significant
MergedOrthoGroup000261Sub001		non-significant	non-significant	non-significant
MergedOrthoGroup000261Sub002		non-significant	non-significant	non-significant
MergedOrthoGroup000261Sub003		non-significant	non-significant	non-significant
MergedOrthoGroup000264		non-significant	root-enhanced	non-significant
MergedOrthoGroup000266		non-significant	nodule-enhanced	nodule-enhanced
MergedOrthoGroup000267		non-significant	nodule-enhanced	nodule-enhanced
MergedOrthoGroup000269		non-significant	root-enhanced	root-enhanced
MergedOrthoGroup000271		non-significant	root-enhanced	root-enhanced
MergedOrthoGroup000272		non-significant	non-significant	non-significant
MergedOrthoGroup000274Sub001		non-significant	non-significant	nodule-enhanced
MergedOrthoGroup000274Sub002		non-significant	non-significant	root-enhanced
MergedOrthoGroup000276Sub001		non-significant	non-significant	non-significant
MergedOrthoGroup000276Sub002		non-significant	non-significant	root-enhanced
MergedOrthoGroup000277		non-significant	non-significant	non-significant
MergedOrthoGroup000278		root-enhanced	root-enhanced	nodule-enhanced
MergedOrthoGroup000280		nodule-enhanced	nodule-enhanced	root-enhanced
MergedOrthoGroup000281		non-significant	nodule-enhanced	nodule-enhanced
MergedOrthoGroup000284Sub001		root-enhanced	non-significant	non-significant
MergedOrthoGroup000287Sub001		non-significant	non-significant	non-significant
MergedOrthoGroup000287Sub002		non-significant	non-significant	non-significant
MergedOrthoGroup000287Sub003		non-significant	non-significant	non-significant
MergedOrthoGroup000287Sub004		non-significant	non-significant	non-significant
MergedOrthoGroup000287Sub005		non-significant	non-significant	non-significant
MergedOrthoGroup000287Sub006		non-significant	non-significant	non-significant
MergedOrthoGroup000287Sub007		non-significant	non-significant	non-significant
MergedOrthoGroup000287Sub008		non-significant	non-significant	non-significant
MergedOrthoGroup000287Sub009		non-significant	root-enhanced	root-enhanced
MergedOrthoGroup000287Sub010		non-significant	root-enhanced	non-significant
MergedOrthoGroup000287Sub011		nodule-enhanced	non-significant	non-significant
MergedOrthoGroup000289		non-significant	non-significant	non-significant
MergedOrthoGroup000290		non-significant	root-enhanced	nodule-enhanced
MergedOrthoGroup000291Sub001		non-significant	non-significant	non-significant
MergedOrthoGroup000292Sub001		non-significant	root-enhanced	non-significant
MergedOrthoGroup000292Sub002		non-significant	non-significant	non-significant
MergedOrthoGroup000293		non-significant	root-enhanced	root-enhanced
MergedOrthoGroup000295Sub001		non-significant	non-significant	non-significant
MergedOrthoGroup000295Sub002		non-significant	root-enhanced	root-enhanced
MergedOrthoGroup000297		non-significant	root-enhanced	non-significant
MergedOrthoGroup000298Sub001		non-significant	non-significant	non-significant
MergedOrthoGroup000298Sub002		non-significant	non-significant	root-enhanced
MergedOrthoGroup000298Sub003		non-significant	root-enhanced	non-significant
MergedOrthoGroup000300		non-significant	non-significant	non-significant
MergedOrthoGroup000301Sub001		non-significant	non-significant	non-significant
MergedOrthoGroup000301Sub002		non-significant	non-significant	nodule-enhanced
MergedOrthoGroup000303Sub001		non-significant	nodule-enhanced	non-significant
MergedOrthoGroup000304Sub001		non-significant	non-significant	non-significant
MergedOrthoGroup000304Sub002		non-significant	nodule-enhanced	non-significant
MergedOrthoGroup000306		non-significant	non-significant	root-enhanced
MergedOrthoGroup000307		non-significant	non-significant	non-significant
MergedOrthoGroup000310		non-significant	nodule-enhanced	non-significant
MergedOrthoGroup000311		non-significant	root-enhanced	root-enhanced
MergedOrthoGroup000314		nodule-enhanced	root-enhanced	non-significant
MergedOrthoGroup000315		non-significant	non-significant	non-significant
MergedOrthoGroup000317		non-significant	non-significant	non-significant
MergedOrthoGroup000318		non-significant	root-enhanced	nodule-enhanced
MergedOrthoGroup000319Sub001		non-significant	non-significant	non-significant
MergedOrthoGroup000319Sub002		non-significant	non-significant	non-significant
MergedOrthoGroup000324		non-significant	nodule-enhanced	non-significant
MergedOrthoGroup000326		non-significant	root-enhanced	root-enhanced
MergedOrthoGroup000329		non-significant	non-significant	root-enhanced
MergedOrthoGroup000330Sub001		non-significant	non-significant	non-significant
MergedOrthoGroup000330Sub002		non-significant	non-significant	non-significant
MergedOrthoGroup000331Sub001		non-significant	non-significant	non-significant
MergedOrthoGroup000332		root-enhanced	root-enhanced	non-significant
MergedOrthoGroup000333Sub001		non-significant	non-significant	non-significant
MergedOrthoGroup000333Sub002		non-significant	non-significant	non-significant
MergedOrthoGroup000335Sub001		non-significant	non-significant	non-significant
MergedOrthoGroup000335Sub002		non-significant	non-significant	non-significant
MergedOrthoGroup000335Sub003		non-significant	non-significant	non-significant
MergedOrthoGroup000335Sub004		non-significant	non-significant	non-significant
MergedOrthoGroup000335Sub005		non-significant	non-significant	root-enhanced
MergedOrthoGroup000336		non-significant	root-enhanced	root-enhanced
MergedOrthoGroup000337		non-significant	nodule-enhanced	non-significant
MergedOrthoGroup000338Sub001		non-significant	root-enhanced	root-enhanced
MergedOrthoGroup000340		non-significant	non-significant	nodule-enhanced
MergedOrthoGroup000341Sub001		non-significant	root-enhanced	non-significant
MergedOrthoGroup000344		non-significant	non-significant	non-significant
MergedOrthoGroup000347		non-significant	non-significant	non-significant
MergedOrthoGroup000353Sub001		non-significant	nodule-enhanced	non-significant
MergedOrthoGroup000354		non-significant	non-significant	non-significant
MergedOrthoGroup000355		nodule-enhanced	nodule-enhanced	root-enhanced
MergedOrthoGroup000356Sub001		non-significant	non-significant	non-significant
MergedOrthoGroup000356Sub002		non-significant	non-significant	non-significant
MergedOrthoGroup000361		non-significant	root-enhanced	root-enhanced
MergedOrthoGroup000363Sub001		non-significant	non-significant	non-significant
MergedOrthoGroup000363Sub002		non-significant	root-enhanced	root-enhanced
MergedOrthoGroup000364		non-significant	non-significant	non-significant
MergedOrthoGroup000365		non-significant	non-significant	non-significant
MergedOrthoGroup000366Sub001		non-significant	root-enhanced	root-enhanced
MergedOrthoGroup000366Sub002		non-significant	nodule-enhanced	non-significant
MergedOrthoGroup000371		non-significant	non-significant	non-significant
MergedOrthoGroup000373Sub001		non-significant	nodule-enhanced	non-significant
MergedOrthoGroup000373Sub002		non-significant	non-significant	non-significant
MergedOrthoGroup000373Sub003		non-significant	non-significant	non-significant
MergedOrthoGroup000378Sub001		non-significant	non-significant	non-significant
MergedOrthoGroup000378Sub002		non-significant	root-enhanced	root-enhanced
MergedOrthoGroup000378Sub003		non-significant	root-enhanced	non-significant
MergedOrthoGroup000378Sub004		non-significant	non-significant	non-significant
MergedOrthoGroup000378Sub005		non-significant	non-significant	non-significant
MergedOrthoGroup000378Sub006		non-significant	nodule-enhanced	non-significant
MergedOrthoGroup000381		non-significant	non-significant	non-significant
MergedOrthoGroup000382		non-significant	root-enhanced	non-significant
MergedOrthoGroup000383		non-significant	non-significant	non-significant
MergedOrthoGroup000384		non-significant	non-significant	non-significant
MergedOrthoGroup000385Sub001		non-significant	nodule-enhanced	root-enhanced
MergedOrthoGroup000388		non-significant	root-enhanced	root-enhanced
MergedOrthoGroup000390		non-significant	non-significant	nodule-enhanced
MergedOrthoGroup000391		non-significant	nodule-enhanced	non-significant
MergedOrthoGroup000392		non-significant	nodule-enhanced	non-significant
MergedOrthoGroup000393		non-significant	nodule-enhanced	nodule-enhanced
MergedOrthoGroup000394Sub001		non-significant	non-significant	non-significant
MergedOrthoGroup000396		non-significant	nodule-enhanced	non-significant
MergedOrthoGroup000397		non-significant	nodule-enhanced	non-significant
MergedOrthoGroup000401		non-significant	non-significant	non-significant
MergedOrthoGroup000402		non-significant	nodule-enhanced	non-significant
MergedOrthoGroup000403Sub001		non-significant	non-significant	root-enhanced
MergedOrthoGroup000404		non-significant	non-significant	non-significant
MergedOrthoGroup000405Sub001		non-significant	root-enhanced	nodule-enhanced
MergedOrthoGroup000406Sub001		non-significant	nodule-enhanced	nodule-enhanced
MergedOrthoGroup000406Sub002		non-significant	non-significant	nodule-enhanced
MergedOrthoGroup000408		non-significant	non-significant	non-significant
MergedOrthoGroup000410		non-significant	non-significant	non-significant
MergedOrthoGroup000411		non-significant	non-significant	non-significant
MergedOrthoGroup000413		root-enhanced	root-enhanced	root-enhanced
MergedOrthoGroup000417Sub001		non-significant	non-significant	non-significant
MergedOrthoGroup000417Sub002		non-significant	non-significant	non-significant
MergedOrthoGroup000417Sub003		non-significant	non-significant	non-significant
MergedOrthoGroup000418Sub001		non-significant	non-significant	non-significant
MergedOrthoGroup000423		non-significant	nodule-enhanced	non-significant
MergedOrthoGroup000425Sub001		non-significant	non-significant	non-significant
MergedOrthoGroup000425Sub002		non-significant	non-significant	root-enhanced
MergedOrthoGroup000426		nodule-enhanced	non-significant	non-significant
MergedOrthoGroup000430		non-significant	non-significant	non-significant
MergedOrthoGroup000432		non-significant	non-significant	non-significant
MergedOrthoGroup000433Sub001		non-significant	non-significant	non-significant
MergedOrthoGroup000433Sub002		non-significant	non-significant	non-significant
MergedOrthoGroup000434		non-significant	root-enhanced	root-enhanced
MergedOrthoGroup000436		non-significant	root-enhanced	nodule-enhanced
MergedOrthoGroup000438Sub001		non-significant	non-significant	non-significant
MergedOrthoGroup000438Sub002		non-significant	non-significant	root-enhanced
MergedOrthoGroup000439Sub001		root-enhanced	root-enhanced	non-significant
MergedOrthoGroup000443		non-significant	non-significant	non-significant
MergedOrthoGroup000444		non-significant	non-significant	non-significant
MergedOrthoGroup000445		non-significant	non-significant	non-significant
MergedOrthoGroup000448		non-significant	nodule-enhanced	non-significant
MergedOrthoGroup000450		non-significant	non-significant	non-significant
MergedOrthoGroup000451Sub001		non-significant	non-significant	non-significant
MergedOrthoGroup000451Sub002		non-significant	non-significant	non-significant
MergedOrthoGroup000451Sub003		non-significant	non-significant	non-significant
MergedOrthoGroup000454		non-significant	non-significant	non-significant
MergedOrthoGroup000455Sub001		non-significant	non-significant	nodule-enhanced
MergedOrthoGroup000457Sub001		non-significant	non-significant	non-significant
MergedOrthoGroup000457Sub002		non-significant	non-significant	non-significant
MergedOrthoGroup000458Sub001		nodule-enhanced	nodule-enhanced	non-significant
MergedOrthoGroup000459		non-significant	non-significant	non-significant
MergedOrthoGroup000461Sub001		non-significant	non-significant	non-significant
MergedOrthoGroup000462Sub001		non-significant	non-significant	non-significant
MergedOrthoGroup000462Sub002		root-enhanced	root-enhanced	non-significant
MergedOrthoGroup000463Sub001		non-significant	non-significant	root-enhanced
MergedOrthoGroup000464Sub001		non-significant	non-significant	non-significant
MergedOrthoGroup000466		non-significant	non-significant	non-significant
MergedOrthoGroup000469		non-significant	non-significant	non-significant
MergedOrthoGroup000470Sub001		non-significant	non-significant	non-significant
MergedOrthoGroup000470Sub002		non-significant	non-significant	nodule-enhanced
MergedOrthoGroup000474		non-significant	non-significant	nodule-enhanced
MergedOrthoGroup000476		non-significant	non-significant	non-significant
MergedOrthoGroup000477		non-significant	root-enhanced	root-enhanced
MergedOrthoGroup000478		non-significant	non-significant	non-significant
MergedOrthoGroup000483		non-significant	non-significant	root- and nodule-enhanced
MergedOrthoGroup000484Sub001		non-significant	non-significant	non-significant
MergedOrthoGroup000486		non-significant	non-significant	root-enhanced
MergedOrthoGroup000488Sub001		non-significant	non-significant	non-significant
MergedOrthoGroup000488Sub002		non-significant	non-significant	non-significant
MergedOrthoGroup000490		non-significant	non-significant	non-significant
MergedOrthoGroup000493Sub001		non-significant	non-significant	non-significant
MergedOrthoGroup000493Sub002		non-significant	non-significant	non-significant
MergedOrthoGroup000494		non-significant	nodule-enhanced	non-significant
MergedOrthoGroup000495		non-significant	non-significant	non-significant
MergedOrthoGroup000496		non-significant	non-significant	non-significant
MergedOrthoGroup000499Sub001		non-significant	non-significant	non-significant
MergedOrthoGroup000499Sub002		non-significant	root-enhanced	non-significant
MergedOrthoGroup000500		non-significant	non-significant	non-significant
MergedOrthoGroup000503		non-significant	non-significant	root-enhanced
MergedOrthoGroup000504Sub001		non-significant	non-significant	non-significant
MergedOrthoGroup000504Sub002		non-significant	non-significant	non-significant
MergedOrthoGroup000505		non-significant	nodule-enhanced	root-enhanced
MergedOrthoGroup000507		non-significant	root-enhanced	non-significant
MergedOrthoGroup000508Sub001		non-significant	non-significant	root-enhanced
MergedOrthoGroup000508Sub002		non-significant	non-significant	non-significant
MergedOrthoGroup000508Sub003		non-significant	non-significant	root-enhanced
MergedOrthoGroup000509Sub001		non-significant	non-significant	non-significant
MergedOrthoGroup000509Sub002		non-significant	non-significant	non-significant
MergedOrthoGroup000511Sub001		non-significant	non-significant	non-significant
MergedOrthoGroup000512Sub001		non-significant	non-significant	non-significant
MergedOrthoGroup000512Sub002		non-significant	non-significant	non-significant
MergedOrthoGroup000517		non-significant	non-significant	non-significant
MergedOrthoGroup000518		non-significant	non-significant	nodule-enhanced
MergedOrthoGroup000520		non-significant	non-significant	nodule-enhanced
MergedOrthoGroup000521		non-significant	non-significant	root-enhanced
MergedOrthoGroup000522		non-significant	non-significant	non-significant
MergedOrthoGroup000523		non-significant	root-enhanced	nodule-enhanced
MergedOrthoGroup000524		non-significant	nodule-enhanced	non-significant
MergedOrthoGroup000531		non-significant	root-enhanced	root-enhanced
MergedOrthoGroup000532		non-significant	non-significant	non-significant
MergedOrthoGroup000533Sub001		non-significant	non-significant	non-significant
MergedOrthoGroup000534Sub001		root-enhanced	non-significant	root-enhanced
MergedOrthoGroup000535Sub001		non-significant	non-significant	root- and nodule-enhanced
MergedOrthoGroup000535Sub002		non-significant	root-enhanced	non-significant
MergedOrthoGroup000536		non-significant	non-significant	root-enhanced
MergedOrthoGroup000539Sub001		non-significant	root-enhanced	non-significant
MergedOrthoGroup000542Sub001		non-significant	non-significant	non-significant
MergedOrthoGroup000544		non-significant	non-significant	non-significant
MergedOrthoGroup000545Sub001		non-significant	non-significant	non-significant
MergedOrthoGroup000545Sub002		non-significant	root- and nodule-enhanced	root-enhanced
MergedOrthoGroup000545Sub003		non-significant	non-significant	non-significant
MergedOrthoGroup000546Sub001		non-significant	root-enhanced	nodule-enhanced
MergedOrthoGroup000546Sub002		root-enhanced	root-enhanced	non-significant
MergedOrthoGroup000546Sub003		non-significant	nodule-enhanced	root-enhanced
MergedOrthoGroup000547		non-significant	nodule-enhanced	non-significant
MergedOrthoGroup000552		non-significant	non-significant	non-significant
MergedOrthoGroup000553Sub001		non-significant	root-enhanced	nodule-enhanced
MergedOrthoGroup000554Sub001		non-significant	non-significant	non-significant
MergedOrthoGroup000556		non-significant	nodule-enhanced	non-significant
MergedOrthoGroup000558Sub001		non-significant	non-significant	non-significant
MergedOrthoGroup000558Sub002		non-significant	non-significant	nodule-enhanced
MergedOrthoGroup000559		non-significant	non-significant	nodule-enhanced
MergedOrthoGroup000562		non-significant	non-significant	root-enhanced
MergedOrthoGroup000563Sub001		non-significant	non-significant	non-significant
MergedOrthoGroup000563Sub002		non-significant	non-significant	non-significant
MergedOrthoGroup000563Sub003		non-significant	non-significant	non-significant
MergedOrthoGroup000568Sub001		non-significant	non-significant	non-significant
MergedOrthoGroup000569		non-significant	non-significant	non-significant
MergedOrthoGroup000570		non-significant	nodule-enhanced	root-enhanced
MergedOrthoGroup000571Sub001		non-significant	non-significant	root-enhanced
MergedOrthoGroup000573Sub001		non-significant	non-significant	non-significant
MergedOrthoGroup000573Sub002		non-significant	non-significant	non-significant
MergedOrthoGroup000574Sub001		non-significant	non-significant	nodule-enhanced
MergedOrthoGroup000575Sub001		non-significant	non-significant	nodule-enhanced
MergedOrthoGroup000576Sub001		nodule-enhanced	root-enhanced	nodule-enhanced
MergedOrthoGroup000577Sub001		non-significant	non-significant	non-significant
MergedOrthoGroup000577Sub002		non-significant	non-significant	root-enhanced
MergedOrthoGroup000577Sub003		non-significant	non-significant	non-significant
MergedOrthoGroup000578		non-significant	non-significant	non-significant
MergedOrthoGroup000579		non-significant	non-significant	non-significant
MergedOrthoGroup000580		non-significant	nodule-enhanced	non-significant
MergedOrthoGroup000582		non-significant	non-significant	root-enhanced
MergedOrthoGroup000585		non-significant	root-enhanced	root-enhanced
MergedOrthoGroup000586Sub001		non-significant	non-significant	root-enhanced
MergedOrthoGroup000592		non-significant	non-significant	non-significant
MergedOrthoGroup000594		non-significant	non-significant	non-significant
MergedOrthoGroup000597Sub001		non-significant	non-significant	non-significant
MergedOrthoGroup000597Sub002		non-significant	non-significant	nodule-enhanced
MergedOrthoGroup000599		non-significant	non-significant	non-significant
MergedOrthoGroup000601		non-significant	non-significant	root-enhanced
MergedOrthoGroup000605		non-significant	root-enhanced	root-enhanced
MergedOrthoGroup000606		non-significant	root-enhanced	nodule-enhanced
MergedOrthoGroup000607		non-significant	root-enhanced	root-enhanced
MergedOrthoGroup000609		non-significant	non-significant	non-significant
MergedOrthoGroup000611Sub001		non-significant	non-significant	non-significant
MergedOrthoGroup000612		non-significant	non-significant	root-enhanced
MergedOrthoGroup000614		non-significant	root-enhanced	non-significant
MergedOrthoGroup000616Sub001		non-significant	non-significant	non-significant
MergedOrthoGroup000616Sub002		non-significant	non-significant	root-enhanced
MergedOrthoGroup000617Sub001		non-significant	non-significant	nodule-enhanced
MergedOrthoGroup000617Sub002		non-significant	non-significant	non-significant
MergedOrthoGroup000620Sub001		non-significant	non-significant	non-significant
MergedOrthoGroup000620Sub002		non-significant	non-significant	non-significant
MergedOrthoGroup000621		non-significant	non-significant	non-significant
MergedOrthoGroup000622Sub001		non-significant	non-significant	root-enhanced
MergedOrthoGroup000622Sub002		non-significant	non-significant	non-significant
MergedOrthoGroup000622Sub003		non-significant	root-enhanced	non-significant
MergedOrthoGroup000623Sub001		non-significant	non-significant	non-significant
MergedOrthoGroup000623Sub002		non-significant	non-significant	non-significant
MergedOrthoGroup000625Sub001		non-significant	non-significant	root-enhanced
MergedOrthoGroup000625Sub002		non-significant	non-significant	non-significant
MergedOrthoGroup000625Sub003		non-significant	non-significant	non-significant
MergedOrthoGroup000626		non-significant	non-significant	non-significant
MergedOrthoGroup000627Sub001		non-significant	non-significant	non-significant
MergedOrthoGroup000627Sub002		root-enhanced	root- and nodule-enhanced	nodule-enhanced
MergedOrthoGroup000629		non-significant	non-significant	nodule-enhanced
MergedOrthoGroup000634		non-significant	nodule-enhanced	nodule-enhanced
MergedOrthoGroup000635		non-significant	root-enhanced	root-enhanced
MergedOrthoGroup000636		non-significant	non-significant	non-significant
MergedOrthoGroup000640Sub001		non-significant	non-significant	root-enhanced
MergedOrthoGroup000641Sub001		non-significant	root-enhanced	root-enhanced
MergedOrthoGroup000643		non-significant	non-significant	non-significant
MergedOrthoGroup000644		non-significant	non-significant	non-significant
MergedOrthoGroup000646Sub001		non-significant	non-significant	non-significant
MergedOrthoGroup000646Sub002		non-significant	non-significant	non-significant
MergedOrthoGroup000646Sub003		non-significant	nodule-enhanced	non-significant
MergedOrthoGroup000648		non-significant	non-significant	non-significant
MergedOrthoGroup000650		non-significant	non-significant	nodule-enhanced
MergedOrthoGroup000653		nodule-enhanced	non-significant	nodule-enhanced
MergedOrthoGroup000656Sub001		non-significant	non-significant	non-significant
MergedOrthoGroup000656Sub002		non-significant	non-significant	non-significant
MergedOrthoGroup000656Sub003		non-significant	nodule-enhanced	non-significant
MergedOrthoGroup000656Sub004		non-significant	non-significant	non-significant
MergedOrthoGroup000657		non-significant	nodule-enhanced	non-significant
MergedOrthoGroup000659		root-enhanced	root-enhanced	non-significant
MergedOrthoGroup000662		non-significant	non-significant	non-significant
MergedOrthoGroup000663		non-significant	non-significant	non-significant
MergedOrthoGroup000664		non-significant	root- and nodule-enhanced	root-enhanced
MergedOrthoGroup000668		non-significant	nodule-enhanced	nodule-enhanced
MergedOrthoGroup000673Sub001		non-significant	non-significant	root-enhanced
MergedOrthoGroup000676		non-significant	non-significant	root-enhanced
MergedOrthoGroup000677		non-significant	non-significant	non-significant
MergedOrthoGroup000678		non-significant	non-significant	non-significant
MergedOrthoGroup000679		non-significant	root-enhanced	non-significant
MergedOrthoGroup000680Sub001		non-significant	root-enhanced	root-enhanced
MergedOrthoGroup000682Sub001		root- and nodule-enhanced	nodule-enhanced	nodule-enhanced
MergedOrthoGroup000684Sub001		non-significant	non-significant	root-enhanced
MergedOrthoGroup000687		non-significant	non-significant	non-significant
MergedOrthoGroup000688Sub001		non-significant	non-significant	non-significant
MergedOrthoGroup000689		non-significant	root- and nodule-enhanced	root-enhanced
MergedOrthoGroup000690		non-significant	non-significant	root-enhanced
MergedOrthoGroup000691		non-significant	non-significant	non-significant
MergedOrthoGroup000692		non-significant	non-significant	non-significant
MergedOrthoGroup000693		non-significant	root-enhanced	nodule-enhanced
MergedOrthoGroup000694		nodule-enhanced	non-significant	non-significant
MergedOrthoGroup000698		non-significant	non-significant	non-significant
MergedOrthoGroup000700		non-significant	nodule-enhanced	non-significant
MergedOrthoGroup000701Sub001		non-significant	non-significant	non-significant
MergedOrthoGroup000701Sub002		non-significant	non-significant	nodule-enhanced
MergedOrthoGroup000704		non-significant	root-enhanced	root-enhanced
MergedOrthoGroup000705		non-significant	non-significant	non-significant
MergedOrthoGroup000707Sub001		non-significant	non-significant	non-significant
MergedOrthoGroup000709		non-significant	non-significant	non-significant
MergedOrthoGroup000711		non-significant	nodule-enhanced	non-significant
MergedOrthoGroup000714Sub001		non-significant	root-enhanced	non-significant
MergedOrthoGroup000716		non-significant	root-enhanced	nodule-enhanced
MergedOrthoGroup000719		non-significant	root-enhanced	non-significant
MergedOrthoGroup000720		non-significant	non-significant	non-significant
MergedOrthoGroup000721Sub001		non-significant	root-enhanced	root-enhanced
MergedOrthoGroup000723Sub001		non-significant	non-significant	non-significant
MergedOrthoGroup000724		root-enhanced	root-enhanced	root- and nodule-enhanced
MergedOrthoGroup000725		non-significant	root-enhanced	nodule-enhanced
MergedOrthoGroup000727		non-significant	root-enhanced	root-enhanced
MergedOrthoGroup000729Sub001		non-significant	non-significant	non-significant
MergedOrthoGroup000729Sub002		non-significant	root-enhanced	non-significant
MergedOrthoGroup000730		non-significant	root-enhanced	non-significant
MergedOrthoGroup000732		root-enhanced	root-enhanced	root-enhanced
MergedOrthoGroup000733		non-significant	nodule-enhanced	nodule-enhanced
MergedOrthoGroup000734		root-enhanced	root-enhanced	non-significant
MergedOrthoGroup000736Sub001		non-significant	non-significant	nodule-enhanced
MergedOrthoGroup000737Sub001		non-significant	non-significant	non-significant
MergedOrthoGroup000737Sub002		non-significant	nodule-enhanced	nodule-enhanced
MergedOrthoGroup000738Sub001		non-significant	nodule-enhanced	non-significant
MergedOrthoGroup000739		root-enhanced	non-significant	non-significant
MergedOrthoGroup000740		non-significant	non-significant	non-significant
MergedOrthoGroup000742		non-significant	non-significant	non-significant
MergedOrthoGroup000743		root-enhanced	non-significant	non-significant
MergedOrthoGroup000744		non-significant	nodule-enhanced	nodule-enhanced
MergedOrthoGroup000748		non-significant	non-significant	non-significant
MergedOrthoGroup000749Sub001		non-significant	non-significant	non-significant
MergedOrthoGroup000750Sub001		non-significant	nodule-enhanced	non-significant
MergedOrthoGroup000750Sub002		non-significant	nodule-enhanced	root-enhanced
MergedOrthoGroup000750Sub003		non-significant	non-significant	non-significant
MergedOrthoGroup000750Sub004		non-significant	non-significant	nodule-enhanced
MergedOrthoGroup000753Sub001		non-significant	non-significant	non-significant
MergedOrthoGroup000754		non-significant	non-significant	non-significant
MergedOrthoGroup000755		non-significant	nodule-enhanced	nodule-enhanced
MergedOrthoGroup000757		non-significant	non-significant	non-significant
MergedOrthoGroup000758		non-significant	non-significant	non-significant
MergedOrthoGroup000760Sub001		non-significant	non-significant	non-significant
MergedOrthoGroup000760Sub002		non-significant	root-enhanced	non-significant
MergedOrthoGroup000760Sub003		non-significant	non-significant	non-significant
MergedOrthoGroup000762		non-significant	non-significant	non-significant
MergedOrthoGroup000763		non-significant	non-significant	non-significant
MergedOrthoGroup000764		non-significant	non-significant	non-significant
MergedOrthoGroup000766Sub001		non-significant	nodule-enhanced	nodule-enhanced
MergedOrthoGroup000768Sub001		non-significant	nodule-enhanced	root-enhanced
MergedOrthoGroup000768Sub002		non-significant	non-significant	non-significant
MergedOrthoGroup000768Sub003		non-significant	non-significant	root-enhanced
MergedOrthoGroup000768Sub004		non-significant	root-enhanced	root-enhanced
MergedOrthoGroup000768Sub005		non-significant	non-significant	nodule-enhanced
MergedOrthoGroup000769		non-significant	non-significant	non-significant
MergedOrthoGroup000770		non-significant	non-significant	root-enhanced
MergedOrthoGroup000772Sub001		non-significant	root-enhanced	nodule-enhanced
MergedOrthoGroup000773		non-significant	non-significant	non-significant
MergedOrthoGroup000775		non-significant	non-significant	non-significant
MergedOrthoGroup000776		non-significant	non-significant	root-enhanced
MergedOrthoGroup000777Sub001		non-significant	non-significant	root-enhanced
MergedOrthoGroup000778		non-significant	non-significant	nodule-enhanced
MergedOrthoGroup000779		non-significant	non-significant	non-significant
MergedOrthoGroup000783		non-significant	non-significant	non-significant
MergedOrthoGroup000784		non-significant	non-significant	non-significant
MergedOrthoGroup000785		root-enhanced	non-significant	non-significant
MergedOrthoGroup000786		non-significant	root-enhanced	root-enhanced
MergedOrthoGroup000789Sub001		non-significant	non-significant	non-significant
MergedOrthoGroup000792		non-significant	non-significant	non-significant
MergedOrthoGroup000794Sub001		non-significant	non-significant	non-significant
MergedOrthoGroup000796		non-significant	non-significant	non-significant
MergedOrthoGroup000797		non-significant	non-significant	non-significant
MergedOrthoGroup000798		non-significant	non-significant	nodule-enhanced
MergedOrthoGroup000800		non-significant	nodule-enhanced	non-significant
MergedOrthoGroup000802Sub001		non-significant	non-significant	nodule-enhanced
MergedOrthoGroup000805		non-significant	nodule-enhanced	nodule-enhanced
MergedOrthoGroup000806Sub001		non-significant	non-significant	non-significant
MergedOrthoGroup000806Sub002		non-significant	nodule-enhanced	non-significant
MergedOrthoGroup000807		non-significant	root-enhanced	nodule-enhanced
MergedOrthoGroup000808		non-significant	root- and nodule-enhanced	nodule-enhanced
MergedOrthoGroup000809		non-significant	root-enhanced	root-enhanced
MergedOrthoGroup000811		non-significant	non-significant	root-enhanced
MergedOrthoGroup000813Sub001		non-significant	non-significant	root-enhanced
MergedOrthoGroup000813Sub002		non-significant	non-significant	root-enhanced
MergedOrthoGroup000813Sub003		non-significant	non-significant	non-significant
MergedOrthoGroup000813Sub004		non-significant	non-significant	non-significant
MergedOrthoGroup000813Sub005		non-significant	non-significant	non-significant
MergedOrthoGroup000814Sub001		non-significant	nodule-enhanced	non-significant
MergedOrthoGroup000814Sub002		non-significant	non-significant	non-significant
MergedOrthoGroup000814Sub003		non-significant	non-significant	root-enhanced
MergedOrthoGroup000814Sub004		non-significant	non-significant	nodule-enhanced
MergedOrthoGroup000816		non-significant	nodule-enhanced	nodule-enhanced
MergedOrthoGroup000817		non-significant	nodule-enhanced	non-significant
MergedOrthoGroup000820		non-significant	non-significant	non-significant
MergedOrthoGroup000821		non-significant	root-enhanced	root-enhanced
MergedOrthoGroup000824Sub001		non-significant	non-significant	non-significant
MergedOrthoGroup000824Sub002		non-significant	non-significant	non-significant
MergedOrthoGroup000826Sub001		non-significant	non-significant	nodule-enhanced
MergedOrthoGroup000829Sub001		non-significant	non-significant	non-significant
MergedOrthoGroup000831		non-significant	root-enhanced	root-enhanced
MergedOrthoGroup000835		non-significant	root-enhanced	non-significant
MergedOrthoGroup000838		non-significant	root-enhanced	root-enhanced
MergedOrthoGroup000841Sub001		non-significant	root-enhanced	root-enhanced
MergedOrthoGroup000843		non-significant	non-significant	root-enhanced
MergedOrthoGroup000844Sub001		non-significant	non-significant	non-significant
MergedOrthoGroup000847		non-significant	non-significant	non-significant
MergedOrthoGroup000848		non-significant	non-significant	non-significant
MergedOrthoGroup000849Sub001		non-significant	non-significant	non-significant
MergedOrthoGroup000849Sub002		non-significant	non-significant	non-significant
MergedOrthoGroup000849Sub003		non-significant	non-significant	nodule-enhanced
MergedOrthoGroup000850		root-enhanced	root-enhanced	root-enhanced
MergedOrthoGroup000851Sub001		non-significant	non-significant	non-significant
MergedOrthoGroup000852Sub001		non-significant	non-significant	non-significant
MergedOrthoGroup000852Sub002		nodule-enhanced	non-significant	non-significant
MergedOrthoGroup000853Sub001		non-significant	non-significant	nodule-enhanced
MergedOrthoGroup000853Sub002		non-significant	non-significant	non-significant
MergedOrthoGroup000853Sub003		non-significant	non-significant	non-significant
MergedOrthoGroup000854		non-significant	non-significant	nodule-enhanced
MergedOrthoGroup000855Sub001		non-significant	root-enhanced	root- and nodule-enhanced
MergedOrthoGroup000855Sub002		non-significant	non-significant	non-significant
MergedOrthoGroup000855Sub003		root-enhanced	nodule-enhanced	root-enhanced
MergedOrthoGroup000857Sub001		non-significant	non-significant	non-significant
MergedOrthoGroup000857Sub002		non-significant	non-significant	non-significant
MergedOrthoGroup000857Sub003		non-significant	non-significant	non-significant
MergedOrthoGroup000857Sub004		non-significant	non-significant	non-significant
MergedOrthoGroup000858		non-significant	nodule-enhanced	non-significant
MergedOrthoGroup000859Sub001		non-significant	non-significant	non-significant
MergedOrthoGroup000859Sub002		root-enhanced	nodule-enhanced	non-significant
MergedOrthoGroup000861Sub001		non-significant	non-significant	non-significant
MergedOrthoGroup000861Sub002		non-significant	non-significant	non-significant
MergedOrthoGroup000863		non-significant	nodule-enhanced	non-significant
MergedOrthoGroup000864Sub001		non-significant	nodule-enhanced	root-enhanced
MergedOrthoGroup000868		non-significant	root-enhanced	non-significant
MergedOrthoGroup000869		non-significant	non-significant	non-significant
MergedOrthoGroup000870		non-significant	non-significant	non-significant
MergedOrthoGroup000871		non-significant	non-significant	non-significant
MergedOrthoGroup000873		non-significant	root-enhanced	non-significant
MergedOrthoGroup000876Sub001		non-significant	non-significant	root-enhanced
MergedOrthoGroup000877		non-significant	non-significant	non-significant
MergedOrthoGroup000878		non-significant	non-significant	non-significant
MergedOrthoGroup000880		nodule-enhanced	nodule-enhanced	nodule-enhanced
MergedOrthoGroup000881Sub001		non-significant	root-enhanced	non-significant
MergedOrthoGroup000882		non-significant	non-significant	root-enhanced
MergedOrthoGroup000884Sub001		non-significant	non-significant	nodule-enhanced
MergedOrthoGroup000884Sub002		non-significant	nodule-enhanced	non-significant
MergedOrthoGroup000887		root-enhanced	nodule-enhanced	non-significant
MergedOrthoGroup000890Sub001		root-enhanced	root-enhanced	non-significant
MergedOrthoGroup000890Sub002		non-significant	non-significant	non-significant
MergedOrthoGroup000892		non-significant	non-significant	nodule-enhanced
MergedOrthoGroup000893		non-significant	nodule-enhanced	non-significant
MergedOrthoGroup000894		non-significant	root-enhanced	root-enhanced
MergedOrthoGroup000895		non-significant	root-enhanced	non-significant
MergedOrthoGroup000898		non-significant	root-enhanced	non-significant
MergedOrthoGroup000901Sub001		non-significant	non-significant	non-significant
MergedOrthoGroup000902Sub001		non-significant	non-significant	non-significant
MergedOrthoGroup000903Sub001		non-significant	non-significant	root-enhanced
MergedOrthoGroup000903Sub002		non-significant	nodule-enhanced	root-enhanced
MergedOrthoGroup000904		non-significant	non-significant	non-significant
MergedOrthoGroup000905		nodule-enhanced	root-enhanced	nodule-enhanced
MergedOrthoGroup000906		non-significant	non-significant	root-enhanced
MergedOrthoGroup000907		non-significant	non-significant	non-significant
MergedOrthoGroup000910		nodule-enhanced	root- and nodule-enhanced	nodule-enhanced
MergedOrthoGroup000911		non-significant	root-enhanced	root-enhanced
MergedOrthoGroup000912		nodule-enhanced	root-enhanced	nodule-enhanced
MergedOrthoGroup000913Sub001		non-significant	root-enhanced	nodule-enhanced
MergedOrthoGroup000913Sub002		non-significant	root- and nodule-enhanced	nodule-enhanced
MergedOrthoGroup000914Sub001		non-significant	non-significant	non-significant
MergedOrthoGroup000915Sub001		non-significant	non-significant	non-significant
MergedOrthoGroup000915Sub002		non-significant	non-significant	non-significant
MergedOrthoGroup000916Sub001		non-significant	root-enhanced	nodule-enhanced
MergedOrthoGroup000917		non-significant	non-significant	non-significant
MergedOrthoGroup000918Sub001		non-significant	non-significant	non-significant
MergedOrthoGroup000918Sub002		non-significant	non-significant	non-significant
MergedOrthoGroup000920		non-significant	nodule-enhanced	root- and nodule-enhanced
MergedOrthoGroup000923		non-significant	non-significant	non-significant
MergedOrthoGroup000924Sub001		non-significant	non-significant	nodule-enhanced
MergedOrthoGroup000924Sub002		non-significant	non-significant	non-significant
MergedOrthoGroup000925		non-significant	nodule-enhanced	root- and nodule-enhanced
MergedOrthoGroup000928		root-enhanced	root-enhanced	root-enhanced
MergedOrthoGroup000929		non-significant	non-significant	root-enhanced
MergedOrthoGroup000931		non-significant	nodule-enhanced	root-enhanced
MergedOrthoGroup000932		non-significant	nodule-enhanced	nodule-enhanced
MergedOrthoGroup000933		non-significant	non-significant	root-enhanced
MergedOrthoGroup000934		non-significant	non-significant	non-significant
MergedOrthoGroup000936Sub001		non-significant	non-significant	non-significant
MergedOrthoGroup000937Sub001		non-significant	root-enhanced	non-significant
MergedOrthoGroup000937Sub002		non-significant	non-significant	non-significant
MergedOrthoGroup000938		non-significant	non-significant	non-significant
MergedOrthoGroup000939		non-significant	nodule-enhanced	nodule-enhanced
MergedOrthoGroup000941Sub001		non-significant	root-enhanced	root-enhanced
MergedOrthoGroup000943Sub001		non-significant	root-enhanced	root-enhanced
MergedOrthoGroup000943Sub002		nodule-enhanced	non-significant	non-significant
MergedOrthoGroup000943Sub003		non-significant	root-enhanced	root-enhanced
MergedOrthoGroup000944Sub001		non-significant	nodule-enhanced	nodule-enhanced
MergedOrthoGroup000945		non-significant	nodule-enhanced	non-significant
MergedOrthoGroup000947Sub001		non-significant	non-significant	non-significant
MergedOrthoGroup000948		non-significant	non-significant	non-significant
MergedOrthoGroup000949		non-significant	non-significant	non-significant
MergedOrthoGroup000951		non-significant	non-significant	non-significant
MergedOrthoGroup000952		non-significant	non-significant	non-significant
MergedOrthoGroup000953Sub001		non-significant	non-significant	non-significant
MergedOrthoGroup000953Sub002		non-significant	non-significant	non-significant
MergedOrthoGroup000955		non-significant	non-significant	non-significant
MergedOrthoGroup000956Sub001		non-significant	non-significant	non-significant
MergedOrthoGroup000960		non-significant	non-significant	non-significant
MergedOrthoGroup000961		non-significant	root-enhanced	root-enhanced
MergedOrthoGroup000963Sub001		non-significant	nodule-enhanced	non-significant
MergedOrthoGroup000963Sub002		non-significant	nodule-enhanced	nodule-enhanced
MergedOrthoGroup000963Sub003		non-significant	non-significant	non-significant
MergedOrthoGroup000964		non-significant	non-significant	non-significant
MergedOrthoGroup000965		non-significant	non-significant	non-significant
MergedOrthoGroup000966		non-significant	non-significant	non-significant
MergedOrthoGroup000967		non-significant	nodule-enhanced	nodule-enhanced
MergedOrthoGroup000968Sub001		non-significant	non-significant	non-significant
MergedOrthoGroup000970		non-significant	nodule-enhanced	non-significant
MergedOrthoGroup000971Sub001		non-significant	non-significant	non-significant
MergedOrthoGroup000973		non-significant	root-enhanced	non-significant
MergedOrthoGroup000975		non-significant	non-significant	non-significant
MergedOrthoGroup000977		nodule-enhanced	nodule-enhanced	nodule-enhanced
MergedOrthoGroup000978		non-significant	non-significant	nodule-enhanced
MergedOrthoGroup000979		non-significant	nodule-enhanced	non-significant
MergedOrthoGroup000981Sub001		non-significant	non-significant	non-significant
MergedOrthoGroup000982		non-significant	non-significant	non-significant
MergedOrthoGroup000983Sub001		non-significant	non-significant	non-significant
MergedOrthoGroup000983Sub002		non-significant	non-significant	non-significant
MergedOrthoGroup000984		root-enhanced	nodule-enhanced	non-significant
MergedOrthoGroup000985Sub001		nodule-enhanced	non-significant	non-significant
MergedOrthoGroup000986Sub001		non-significant	root-enhanced	non-significant
MergedOrthoGroup000986Sub002		non-significant	non-significant	non-significant
MergedOrthoGroup000986Sub003		non-significant	non-significant	non-significant
MergedOrthoGroup000989		non-significant	root-enhanced	root-enhanced
MergedOrthoGroup000991Sub001		non-significant	root-enhanced	nodule-enhanced
MergedOrthoGroup000993		non-significant	non-significant	root- and nodule-enhanced
MergedOrthoGroup000994		non-significant	non-significant	non-significant
MergedOrthoGroup000996Sub001		non-significant	non-significant	non-significant
MergedOrthoGroup000996Sub002		non-significant	non-significant	root-enhanced
MergedOrthoGroup000997Sub001		non-significant	non-significant	non-significant
MergedOrthoGroup000997Sub002		non-significant	non-significant	non-significant
MergedOrthoGroup000998		non-significant	non-significant	root-enhanced
MergedOrthoGroup001000		non-significant	non-significant	non-significant
MergedOrthoGroup001001		non-significant	root-enhanced	nodule-enhanced
MergedOrthoGroup001003		non-significant	non-significant	non-significant
MergedOrthoGroup001006		non-significant	non-significant	non-significant
MergedOrthoGroup001007		non-significant	non-significant	non-significant
MergedOrthoGroup001008		nodule-enhanced	non-significant	root-enhanced
MergedOrthoGroup001011Sub001		root-enhanced	non-significant	non-significant
MergedOrthoGroup001011Sub002		non-significant	root-enhanced	root-enhanced
MergedOrthoGroup001017		root-enhanced	non-significant	root-enhanced
MergedOrthoGroup001019Sub001		non-significant	non-significant	non-significant
MergedOrthoGroup001019Sub002		non-significant	non-significant	non-significant
MergedOrthoGroup001020		non-significant	non-significant	non-significant
MergedOrthoGroup001022		non-significant	root-enhanced	non-significant
MergedOrthoGroup001023		non-significant	non-significant	non-significant
MergedOrthoGroup001024		non-significant	non-significant	root-enhanced
MergedOrthoGroup001026		non-significant	non-significant	non-significant
MergedOrthoGroup001030		non-significant	non-significant	non-significant
MergedOrthoGroup001032		non-significant	non-significant	non-significant
MergedOrthoGroup001033		non-significant	root-enhanced	non-significant
MergedOrthoGroup001035		non-significant	non-significant	non-significant
MergedOrthoGroup001039Sub001		non-significant	non-significant	non-significant
MergedOrthoGroup001039Sub002		non-significant	non-significant	non-significant
MergedOrthoGroup001040		non-significant	non-significant	root- and nodule-enhanced
MergedOrthoGroup001041		non-significant	nodule-enhanced	non-significant
MergedOrthoGroup001042		non-significant	non-significant	non-significant
MergedOrthoGroup001044		non-significant	non-significant	non-significant
MergedOrthoGroup001045		non-significant	non-significant	nodule-enhanced
MergedOrthoGroup001047Sub001		non-significant	non-significant	non-significant
MergedOrthoGroup001047Sub002		non-significant	non-significant	non-significant
MergedOrthoGroup001051		non-significant	non-significant	non-significant
MergedOrthoGroup001056		non-significant	non-significant	non-significant
MergedOrthoGroup001057Sub001		non-significant	non-significant	non-significant
MergedOrthoGroup001057Sub002		non-significant	non-significant	non-significant
MergedOrthoGroup001057Sub003		non-significant	non-significant	non-significant
MergedOrthoGroup001058		non-significant	non-significant	non-significant
MergedOrthoGroup001061		non-significant	non-significant	non-significant
MergedOrthoGroup001062		non-significant	nodule-enhanced	nodule-enhanced
MergedOrthoGroup001063		non-significant	nodule-enhanced	nodule-enhanced
MergedOrthoGroup001064Sub001		non-significant	non-significant	non-significant
MergedOrthoGroup001064Sub002		non-significant	non-significant	nodule-enhanced
MergedOrthoGroup001065Sub001		non-significant	non-significant	non-significant
MergedOrthoGroup001067		non-significant	root-enhanced	non-significant
MergedOrthoGroup001069		non-significant	non-significant	root-enhanced
MergedOrthoGroup001070Sub001		non-significant	non-significant	root-enhanced
MergedOrthoGroup001071Sub001		non-significant	non-significant	non-significant
MergedOrthoGroup001071Sub002		root-enhanced	root-enhanced	root- and nodule-enhanced
MergedOrthoGroup001072		non-significant	non-significant	non-significant
MergedOrthoGroup001075Sub001		non-significant	root-enhanced	non-significant
MergedOrthoGroup001078Sub001		non-significant	non-significant	non-significant
MergedOrthoGroup001080Sub001		non-significant	non-significant	root-enhanced
MergedOrthoGroup001081		root-enhanced	root-enhanced	root-enhanced
MergedOrthoGroup001082		non-significant	non-significant	non-significant
MergedOrthoGroup001084Sub001		non-significant	root-enhanced	non-significant
MergedOrthoGroup001089		non-significant	non-significant	non-significant
MergedOrthoGroup001090Sub001		non-significant	non-significant	non-significant
MergedOrthoGroup001091		root-enhanced	root-enhanced	root-enhanced
MergedOrthoGroup001093		non-significant	nodule-enhanced	non-significant
MergedOrthoGroup001096Sub001		non-significant	root-enhanced	non-significant
MergedOrthoGroup001097		non-significant	non-significant	nodule-enhanced
MergedOrthoGroup001098		non-significant	non-significant	root-enhanced
MergedOrthoGroup001103		non-significant	non-significant	non-significant
MergedOrthoGroup001104Sub001		non-significant	nodule-enhanced	non-significant
MergedOrthoGroup001104Sub002		non-significant	non-significant	non-significant
MergedOrthoGroup001106		non-significant	root-enhanced	nodule-enhanced
MergedOrthoGroup001108Sub001		root-enhanced	non-significant	non-significant
MergedOrthoGroup001108Sub002		non-significant	non-significant	non-significant
MergedOrthoGroup001110		non-significant	non-significant	non-significant
MergedOrthoGroup001112		non-significant	non-significant	root-enhanced
MergedOrthoGroup001113		non-significant	root-enhanced	nodule-enhanced
MergedOrthoGroup001115Sub001		non-significant	non-significant	non-significant
MergedOrthoGroup001117Sub001		non-significant	non-significant	non-significant
MergedOrthoGroup001117Sub002		non-significant	non-significant	non-significant
MergedOrthoGroup001117Sub003		non-significant	non-significant	non-significant
MergedOrthoGroup001120Sub001		non-significant	non-significant	non-significant
MergedOrthoGroup001120Sub002		non-significant	non-significant	non-significant
MergedOrthoGroup001121Sub001		non-significant	root-enhanced	non-significant
MergedOrthoGroup001122Sub001		non-significant	non-significant	root-enhanced
MergedOrthoGroup001124Sub001		non-significant	root-enhanced	nodule-enhanced
MergedOrthoGroup001124Sub002		non-significant	non-significant	non-significant
MergedOrthoGroup001125		non-significant	root-enhanced	root-enhanced
MergedOrthoGroup001127Sub001		non-significant	non-significant	root- and nodule-enhanced
MergedOrthoGroup001127Sub002		non-significant	non-significant	non-significant
MergedOrthoGroup001127Sub003		non-significant	non-significant	non-significant
MergedOrthoGroup001127Sub004		non-significant	non-significant	non-significant
MergedOrthoGroup001128		non-significant	root-enhanced	root-enhanced
MergedOrthoGroup001130		non-significant	non-significant	non-significant
MergedOrthoGroup001131		non-significant	nodule-enhanced	non-significant
MergedOrthoGroup001132Sub001		non-significant	non-significant	non-significant
MergedOrthoGroup001134		non-significant	root-enhanced	non-significant
MergedOrthoGroup001136Sub001		non-significant	non-significant	nodule-enhanced
MergedOrthoGroup001136Sub002		non-significant	non-significant	root-enhanced
MergedOrthoGroup001137Sub001		root-enhanced	non-significant	root-enhanced
MergedOrthoGroup001137Sub002		non-significant	root-enhanced	nodule-enhanced
MergedOrthoGroup001140		non-significant	root-enhanced	root-enhanced
MergedOrthoGroup001142		non-significant	non-significant	non-significant
MergedOrthoGroup001143		non-significant	non-significant	non-significant
MergedOrthoGroup001145		non-significant	root-enhanced	nodule-enhanced
MergedOrthoGroup001147Sub001		non-significant	non-significant	non-significant
MergedOrthoGroup001148Sub001		non-significant	non-significant	non-significant
MergedOrthoGroup001148Sub002		non-significant	non-significant	non-significant
MergedOrthoGroup001149		non-significant	nodule-enhanced	root-enhanced
MergedOrthoGroup001151		non-significant	non-significant	non-significant
MergedOrthoGroup001152		non-significant	root-enhanced	non-significant
MergedOrthoGroup001156		non-significant	root-enhanced	non-significant
MergedOrthoGroup001157Sub001		non-significant	non-significant	non-significant
MergedOrthoGroup001158		non-significant	non-significant	non-significant
MergedOrthoGroup001159		non-significant	non-significant	non-significant
MergedOrthoGroup001162		non-significant	non-significant	non-significant
MergedOrthoGroup001163		root-enhanced	root-enhanced	non-significant
MergedOrthoGroup001164		non-significant	non-significant	nodule-enhanced
MergedOrthoGroup001165		non-significant	root-enhanced	root-enhanced
MergedOrthoGroup001166		non-significant	non-significant	non-significant
MergedOrthoGroup001167		non-significant	root-enhanced	root-enhanced
MergedOrthoGroup001168		non-significant	nodule-enhanced	non-significant
MergedOrthoGroup001169		non-significant	non-significant	non-significant
MergedOrthoGroup001174		non-significant	non-significant	nodule-enhanced
MergedOrthoGroup001176		non-significant	non-significant	non-significant
MergedOrthoGroup001179		root-enhanced	non-significant	root-enhanced
MergedOrthoGroup001180		non-significant	non-significant	root-enhanced
MergedOrthoGroup001181		non-significant	root-enhanced	non-significant
MergedOrthoGroup001182		non-significant	non-significant	non-significant
MergedOrthoGroup001184		non-significant	root-enhanced	non-significant
MergedOrthoGroup001187		non-significant	root-enhanced	non-significant
MergedOrthoGroup001193		non-significant	non-significant	non-significant
MergedOrthoGroup001195		non-significant	root-enhanced	nodule-enhanced
MergedOrthoGroup001196		non-significant	root-enhanced	non-significant
MergedOrthoGroup001198Sub001		nodule-enhanced	non-significant	nodule-enhanced
MergedOrthoGroup001199		non-significant	nodule-enhanced	non-significant
MergedOrthoGroup001200		root-enhanced	root-enhanced	root-enhanced
MergedOrthoGroup001201Sub001		non-significant	non-significant	root-enhanced
MergedOrthoGroup001201Sub002		non-significant	root-enhanced	nodule-enhanced
MergedOrthoGroup001201Sub003		non-significant	nodule-enhanced	non-significant
MergedOrthoGroup001202Sub001		non-significant	non-significant	non-significant
MergedOrthoGroup001202Sub002		non-significant	non-significant	non-significant
MergedOrthoGroup001204		non-significant	non-significant	root-enhanced
MergedOrthoGroup001205Sub001		non-significant	non-significant	non-significant
MergedOrthoGroup001205Sub002		non-significant	root-enhanced	nodule-enhanced
MergedOrthoGroup001205Sub003		non-significant	non-significant	non-significant
MergedOrthoGroup001207		non-significant	non-significant	non-significant
MergedOrthoGroup001208		non-significant	root-enhanced	root-enhanced
MergedOrthoGroup001209Sub001		non-significant	non-significant	non-significant
MergedOrthoGroup001212		non-significant	non-significant	non-significant
MergedOrthoGroup001214		non-significant	non-significant	nodule-enhanced
MergedOrthoGroup001215		non-significant	root-enhanced	non-significant
MergedOrthoGroup001216		non-significant	non-significant	non-significant
MergedOrthoGroup001218		root-enhanced	nodule-enhanced	root-enhanced
MergedOrthoGroup001219Sub001		non-significant	non-significant	root- and nodule-enhanced
MergedOrthoGroup001222		non-significant	non-significant	non-significant
MergedOrthoGroup001223Sub001		non-significant	non-significant	non-significant
MergedOrthoGroup001225		non-significant	non-significant	root-enhanced
MergedOrthoGroup001227Sub001		non-significant	non-significant	non-significant
MergedOrthoGroup001227Sub002		non-significant	root-enhanced	root-enhanced
MergedOrthoGroup001228		non-significant	non-significant	non-significant
MergedOrthoGroup001230Sub001		non-significant	non-significant	non-significant
MergedOrthoGroup001231		non-significant	nodule-enhanced	non-significant
MergedOrthoGroup001232		non-significant	non-significant	non-significant
MergedOrthoGroup001233Sub001		non-significant	non-significant	non-significant
MergedOrthoGroup001234		non-significant	non-significant	non-significant
MergedOrthoGroup001238		non-significant	nodule-enhanced	nodule-enhanced
MergedOrthoGroup001239		non-significant	non-significant	non-significant
MergedOrthoGroup001240		non-significant	non-significant	non-significant
MergedOrthoGroup001242Sub001		non-significant	non-significant	non-significant
MergedOrthoGroup001242Sub002		non-significant	root-enhanced	non-significant
MergedOrthoGroup001242Sub003		non-significant	non-significant	nodule-enhanced
MergedOrthoGroup001242Sub004		root-enhanced	non-significant	non-significant
MergedOrthoGroup001242Sub005		non-significant	non-significant	non-significant
MergedOrthoGroup001243		non-significant	root-enhanced	nodule-enhanced
MergedOrthoGroup001244		non-significant	non-significant	root-enhanced
MergedOrthoGroup001245		root-enhanced	root-enhanced	root-enhanced
MergedOrthoGroup001248Sub001		root-enhanced	root-enhanced	root-enhanced
MergedOrthoGroup001248Sub002		non-significant	non-significant	non-significant
MergedOrthoGroup001248Sub003		non-significant	non-significant	non-significant
MergedOrthoGroup001251		root-enhanced	non-significant	root-enhanced
MergedOrthoGroup001254		non-significant	non-significant	nodule-enhanced
MergedOrthoGroup001256		non-significant	non-significant	nodule-enhanced
MergedOrthoGroup001259		non-significant	non-significant	nodule-enhanced
MergedOrthoGroup001261		non-significant	non-significant	non-significant
MergedOrthoGroup001263Sub001		non-significant	root-enhanced	root-enhanced
MergedOrthoGroup001263Sub002		non-significant	non-significant	root-enhanced
MergedOrthoGroup001264Sub001		non-significant	non-significant	non-significant
MergedOrthoGroup001265		non-significant	nodule-enhanced	non-significant
MergedOrthoGroup001266		non-significant	root-enhanced	non-significant
MergedOrthoGroup001267		non-significant	non-significant	non-significant
MergedOrthoGroup001268		non-significant	non-significant	non-significant
MergedOrthoGroup001269		non-significant	non-significant	non-significant
MergedOrthoGroup001270		non-significant	nodule-enhanced	non-significant
MergedOrthoGroup001271Sub001		non-significant	non-significant	non-significant
MergedOrthoGroup001273		non-significant	non-significant	non-significant
MergedOrthoGroup001276		non-significant	nodule-enhanced	non-significant
MergedOrthoGroup001277Sub001		non-significant	non-significant	non-significant
MergedOrthoGroup001278		non-significant	non-significant	non-significant
MergedOrthoGroup001280		non-significant	non-significant	non-significant
MergedOrthoGroup001281		non-significant	non-significant	non-significant
MergedOrthoGroup001284		non-significant	non-significant	non-significant
MergedOrthoGroup001285		non-significant	non-significant	nodule-enhanced
MergedOrthoGroup001286		non-significant	non-significant	root-enhanced
MergedOrthoGroup001287		non-significant	non-significant	non-significant
MergedOrthoGroup001289		non-significant	non-significant	non-significant
MergedOrthoGroup001290Sub001		non-significant	non-significant	non-significant
MergedOrthoGroup001290Sub002		non-significant	nodule-enhanced	nodule-enhanced
MergedOrthoGroup001294		non-significant	non-significant	non-significant
MergedOrthoGroup001295		nodule-enhanced	nodule-enhanced	nodule-enhanced
MergedOrthoGroup001299		non-significant	non-significant	nodule-enhanced
MergedOrthoGroup001300		non-significant	non-significant	non-significant
MergedOrthoGroup001301		non-significant	non-significant	non-significant
MergedOrthoGroup001302Sub001		non-significant	non-significant	non-significant
MergedOrthoGroup001303		non-significant	non-significant	non-significant
MergedOrthoGroup001307		non-significant	non-significant	nodule-enhanced
MergedOrthoGroup001308		non-significant	nodule-enhanced	non-significant
MergedOrthoGroup001309Sub001		non-significant	non-significant	non-significant
MergedOrthoGroup001309Sub002		non-significant	non-significant	non-significant
MergedOrthoGroup001309Sub003		non-significant	root-enhanced	nodule-enhanced
MergedOrthoGroup001310		non-significant	non-significant	non-significant
MergedOrthoGroup001311		non-significant	nodule-enhanced	non-significant
MergedOrthoGroup001312		non-significant	non-significant	root-enhanced
MergedOrthoGroup001315		non-significant	non-significant	non-significant
MergedOrthoGroup001316Sub001		non-significant	non-significant	root-enhanced
MergedOrthoGroup001319		non-significant	non-significant	non-significant
MergedOrthoGroup001321Sub001		non-significant	non-significant	non-significant
MergedOrthoGroup001322Sub001		non-significant	non-significant	non-significant
MergedOrthoGroup001326Sub001		non-significant	non-significant	non-significant
MergedOrthoGroup001326Sub002		non-significant	non-significant	non-significant
MergedOrthoGroup001329Sub001		non-significant	non-significant	root-enhanced
MergedOrthoGroup001329Sub002		non-significant	root-enhanced	root-enhanced
MergedOrthoGroup001330		non-significant	root-enhanced	non-significant
MergedOrthoGroup001331Sub001		non-significant	non-significant	non-significant
MergedOrthoGroup001332		non-significant	non-significant	root-enhanced
MergedOrthoGroup001333		non-significant	non-significant	non-significant
MergedOrthoGroup001334		non-significant	non-significant	non-significant
MergedOrthoGroup001343		non-significant	nodule-enhanced	non-significant
MergedOrthoGroup001345Sub001		non-significant	non-significant	non-significant
MergedOrthoGroup001346Sub001		non-significant	non-significant	nodule-enhanced
MergedOrthoGroup001347		non-significant	non-significant	non-significant
MergedOrthoGroup001348Sub001		non-significant	non-significant	non-significant
MergedOrthoGroup001348Sub002		non-significant	non-significant	non-significant
MergedOrthoGroup001348Sub003		non-significant	non-significant	non-significant
MergedOrthoGroup001349Sub001		non-significant	root-enhanced	non-significant
MergedOrthoGroup001351		non-significant	non-significant	non-significant
MergedOrthoGroup001354Sub001		non-significant	non-significant	root-enhanced
MergedOrthoGroup001355		non-significant	non-significant	nodule-enhanced
MergedOrthoGroup001356		non-significant	non-significant	non-significant
MergedOrthoGroup001357		non-significant	non-significant	nodule-enhanced
MergedOrthoGroup001360		non-significant	root-enhanced	non-significant
MergedOrthoGroup001364Sub001		non-significant	non-significant	non-significant
MergedOrthoGroup001365		non-significant	non-significant	non-significant
MergedOrthoGroup001371		non-significant	non-significant	non-significant
MergedOrthoGroup001372		non-significant	non-significant	non-significant
MergedOrthoGroup001373		non-significant	non-significant	non-significant
MergedOrthoGroup001374		non-significant	non-significant	nodule-enhanced
MergedOrthoGroup001379		non-significant	nodule-enhanced	non-significant
MergedOrthoGroup001380		non-significant	non-significant	non-significant
MergedOrthoGroup001381		root-enhanced	root-enhanced	root-enhanced
MergedOrthoGroup001382Sub001		non-significant	non-significant	non-significant
MergedOrthoGroup001382Sub002		non-significant	non-significant	non-significant
MergedOrthoGroup001383		non-significant	non-significant	non-significant
MergedOrthoGroup001384		non-significant	non-significant	non-significant
MergedOrthoGroup001386Sub001		non-significant	nodule-enhanced	root-enhanced
MergedOrthoGroup001387Sub001		non-significant	non-significant	non-significant
MergedOrthoGroup001387Sub002		non-significant	non-significant	nodule-enhanced
MergedOrthoGroup001389		non-significant	non-significant	non-significant
MergedOrthoGroup001390		root-enhanced	root-enhanced	non-significant
MergedOrthoGroup001391Sub001		non-significant	non-significant	root-enhanced
MergedOrthoGroup001392		non-significant	root-enhanced	nodule-enhanced
MergedOrthoGroup001396Sub001		non-significant	non-significant	non-significant
MergedOrthoGroup001397		non-significant	non-significant	root-enhanced
MergedOrthoGroup001398		non-significant	non-significant	non-significant
MergedOrthoGroup001399		non-significant	non-significant	non-significant
MergedOrthoGroup001400		non-significant	nodule-enhanced	non-significant
MergedOrthoGroup001403		root-enhanced	non-significant	non-significant
MergedOrthoGroup001404		non-significant	non-significant	non-significant
MergedOrthoGroup001406Sub001		root-enhanced	root-enhanced	non-significant
MergedOrthoGroup001406Sub002		non-significant	non-significant	non-significant
MergedOrthoGroup001407Sub001		non-significant	root-enhanced	non-significant
MergedOrthoGroup001407Sub002		non-significant	non-significant	non-significant
MergedOrthoGroup001407Sub003		non-significant	nodule-enhanced	non-significant
MergedOrthoGroup001409		non-significant	non-significant	non-significant
MergedOrthoGroup001410Sub001		non-significant	non-significant	nodule-enhanced
MergedOrthoGroup001410Sub002		non-significant	non-significant	non-significant
MergedOrthoGroup001411Sub001		non-significant	non-significant	non-significant
MergedOrthoGroup001411Sub002		non-significant	non-significant	non-significant
MergedOrthoGroup001411Sub003		non-significant	non-significant	non-significant
MergedOrthoGroup001411Sub004		non-significant	nodule-enhanced	root-enhanced
MergedOrthoGroup001412		non-significant	non-significant	nodule-enhanced
MergedOrthoGroup001416		non-significant	root-enhanced	root- and nodule-enhanced
MergedOrthoGroup001417		root-enhanced	non-significant	root-enhanced
MergedOrthoGroup001419Sub001		non-significant	non-significant	nodule-enhanced
MergedOrthoGroup001419Sub002		non-significant	non-significant	nodule-enhanced
MergedOrthoGroup001419Sub003		non-significant	non-significant	non-significant
MergedOrthoGroup001423		non-significant	root-enhanced	root-enhanced
MergedOrthoGroup001424		non-significant	non-significant	non-significant
MergedOrthoGroup001425		non-significant	non-significant	non-significant
MergedOrthoGroup001426Sub001		non-significant	nodule-enhanced	nodule-enhanced
MergedOrthoGroup001429Sub001		non-significant	non-significant	non-significant
MergedOrthoGroup001430Sub001		non-significant	non-significant	non-significant
MergedOrthoGroup001431Sub001		non-significant	root-enhanced	non-significant
MergedOrthoGroup001432		non-significant	non-significant	non-significant
MergedOrthoGroup001434		non-significant	non-significant	non-significant
MergedOrthoGroup001435Sub001		non-significant	non-significant	non-significant
MergedOrthoGroup001437Sub001		non-significant	non-significant	non-significant
MergedOrthoGroup001437Sub002		non-significant	non-significant	non-significant
MergedOrthoGroup001438		non-significant	non-significant	non-significant
MergedOrthoGroup001440		non-significant	non-significant	non-significant
MergedOrthoGroup001441Sub001		non-significant	non-significant	non-significant
MergedOrthoGroup001444		non-significant	non-significant	non-significant
MergedOrthoGroup001445		non-significant	non-significant	nodule-enhanced
MergedOrthoGroup001447Sub001		non-significant	non-significant	nodule-enhanced
MergedOrthoGroup001447Sub002		non-significant	non-significant	non-significant
MergedOrthoGroup001448		non-significant	non-significant	nodule-enhanced
MergedOrthoGroup001449Sub001		non-significant	non-significant	non-significant
MergedOrthoGroup001449Sub002		non-significant	non-significant	non-significant
MergedOrthoGroup001451		non-significant	non-significant	non-significant
MergedOrthoGroup001452		non-significant	nodule-enhanced	nodule-enhanced
MergedOrthoGroup001453Sub001		non-significant	non-significant	non-significant
MergedOrthoGroup001454		non-significant	nodule-enhanced	non-significant
MergedOrthoGroup001455Sub001		non-significant	non-significant	non-significant
MergedOrthoGroup001460		root-enhanced	root-enhanced	non-significant
MergedOrthoGroup001462		non-significant	non-significant	non-significant
MergedOrthoGroup001463Sub001		non-significant	non-significant	non-significant
MergedOrthoGroup001465		non-significant	non-significant	non-significant
MergedOrthoGroup001468Sub001		non-significant	non-significant	non-significant
MergedOrthoGroup001468Sub002		non-significant	nodule-enhanced	non-significant
MergedOrthoGroup001470		non-significant	non-significant	root-enhanced
MergedOrthoGroup001471		non-significant	non-significant	non-significant
MergedOrthoGroup001472		non-significant	root-enhanced	root-enhanced
MergedOrthoGroup001473		non-significant	non-significant	non-significant
MergedOrthoGroup001474		non-significant	non-significant	root-enhanced
MergedOrthoGroup001477Sub001		non-significant	non-significant	non-significant
MergedOrthoGroup001477Sub002		non-significant	non-significant	non-significant
MergedOrthoGroup001477Sub003		non-significant	non-significant	non-significant
MergedOrthoGroup001478		non-significant	non-significant	non-significant
MergedOrthoGroup001479		non-significant	non-significant	non-significant
MergedOrthoGroup001481Sub001		non-significant	non-significant	non-significant
MergedOrthoGroup001481Sub002		non-significant	non-significant	non-significant
MergedOrthoGroup001483		non-significant	non-significant	non-significant
MergedOrthoGroup001484		non-significant	non-significant	non-significant
MergedOrthoGroup001485		non-significant	non-significant	non-significant
MergedOrthoGroup001487		non-significant	nodule-enhanced	nodule-enhanced
MergedOrthoGroup001488		non-significant	non-significant	nodule-enhanced
MergedOrthoGroup001490Sub001		root-enhanced	non-significant	non-significant
MergedOrthoGroup001490Sub002		non-significant	non-significant	non-significant
MergedOrthoGroup001490Sub003		non-significant	non-significant	non-significant
MergedOrthoGroup001490Sub004		non-significant	non-significant	non-significant
MergedOrthoGroup001492		non-significant	nodule-enhanced	non-significant
MergedOrthoGroup001493		non-significant	non-significant	non-significant
MergedOrthoGroup001495Sub001		non-significant	root-enhanced	root-enhanced
MergedOrthoGroup001496		non-significant	non-significant	non-significant
MergedOrthoGroup001497		non-significant	nodule-enhanced	non-significant
MergedOrthoGroup001498Sub001		non-significant	non-significant	root-enhanced
MergedOrthoGroup001500Sub001		non-significant	root-enhanced	non-significant
MergedOrthoGroup001501		non-significant	non-significant	nodule-enhanced
MergedOrthoGroup001502Sub001		non-significant	nodule-enhanced	root-enhanced
MergedOrthoGroup001503Sub001		non-significant	non-significant	non-significant
MergedOrthoGroup001503Sub002		non-significant	root-enhanced	root-enhanced
MergedOrthoGroup001505Sub001		nodule-enhanced	non-significant	nodule-enhanced
MergedOrthoGroup001505Sub002		non-significant	non-significant	nodule-enhanced
MergedOrthoGroup001510		non-significant	non-significant	non-significant
MergedOrthoGroup001511		non-significant	non-significant	root-enhanced
MergedOrthoGroup001512Sub001		non-significant	non-significant	root-enhanced
MergedOrthoGroup001512Sub002		non-significant	non-significant	non-significant
MergedOrthoGroup001512Sub003		non-significant	non-significant	non-significant
MergedOrthoGroup001512Sub004		non-significant	root-enhanced	root-enhanced
MergedOrthoGroup001513		non-significant	non-significant	non-significant
MergedOrthoGroup001514		non-significant	non-significant	non-significant
MergedOrthoGroup001516		non-significant	non-significant	non-significant
MergedOrthoGroup001517		non-significant	non-significant	nodule-enhanced
MergedOrthoGroup001518		non-significant	nodule-enhanced	nodule-enhanced
MergedOrthoGroup001521Sub001		non-significant	non-significant	non-significant
MergedOrthoGroup001521Sub002		non-significant	non-significant	non-significant
MergedOrthoGroup001522Sub001		non-significant	non-significant	non-significant
MergedOrthoGroup001523		non-significant	non-significant	nodule-enhanced
MergedOrthoGroup001524		non-significant	non-significant	non-significant
MergedOrthoGroup001526		non-significant	non-significant	non-significant
MergedOrthoGroup001527		non-significant	non-significant	non-significant
MergedOrthoGroup001528Sub001		non-significant	nodule-enhanced	non-significant
MergedOrthoGroup001529		nodule-enhanced	root-enhanced	nodule-enhanced
MergedOrthoGroup001530		non-significant	non-significant	non-significant
MergedOrthoGroup001531		non-significant	non-significant	non-significant
MergedOrthoGroup001533Sub001		non-significant	non-significant	non-significant
MergedOrthoGroup001533Sub002		non-significant	non-significant	non-significant
MergedOrthoGroup001534		non-significant	non-significant	nodule-enhanced
MergedOrthoGroup001535		non-significant	non-significant	non-significant
MergedOrthoGroup001538		non-significant	non-significant	root-enhanced
MergedOrthoGroup001539		non-significant	non-significant	non-significant
MergedOrthoGroup001540		non-significant	non-significant	non-significant
MergedOrthoGroup001541Sub001		non-significant	root-enhanced	nodule-enhanced
MergedOrthoGroup001542		non-significant	nodule-enhanced	non-significant
MergedOrthoGroup001547Sub001		non-significant	non-significant	root-enhanced
MergedOrthoGroup001547Sub002		non-significant	non-significant	non-significant
MergedOrthoGroup001551		non-significant	non-significant	non-significant
MergedOrthoGroup001553		root-enhanced	non-significant	non-significant
MergedOrthoGroup001555		non-significant	nodule-enhanced	root-enhanced
MergedOrthoGroup001556Sub001		non-significant	non-significant	non-significant
MergedOrthoGroup001557		non-significant	non-significant	non-significant
MergedOrthoGroup001558Sub001		non-significant	non-significant	non-significant
MergedOrthoGroup001558Sub002		non-significant	non-significant	nodule-enhanced
MergedOrthoGroup001558Sub003		non-significant	non-significant	non-significant
MergedOrthoGroup001558Sub004		root-enhanced	root-enhanced	non-significant
MergedOrthoGroup001558Sub005		non-significant	non-significant	non-significant
MergedOrthoGroup001559Sub001		non-significant	non-significant	non-significant
MergedOrthoGroup001559Sub002		non-significant	non-significant	nodule-enhanced
MergedOrthoGroup001560		non-significant	non-significant	non-significant
MergedOrthoGroup001565Sub001		non-significant	root-enhanced	non-significant
MergedOrthoGroup001566		non-significant	nodule-enhanced	root-enhanced
MergedOrthoGroup001567Sub001		non-significant	non-significant	non-significant
MergedOrthoGroup001567Sub002		non-significant	non-significant	root- and nodule-enhanced
MergedOrthoGroup001567Sub003		non-significant	non-significant	nodule-enhanced
MergedOrthoGroup001568Sub001		non-significant	non-significant	non-significant
MergedOrthoGroup001568Sub002		non-significant	non-significant	non-significant
MergedOrthoGroup001570		non-significant	non-significant	non-significant
MergedOrthoGroup001571		root-enhanced	non-significant	root-enhanced
MergedOrthoGroup001575		non-significant	non-significant	non-significant
MergedOrthoGroup001576Sub001		non-significant	non-significant	non-significant
MergedOrthoGroup001581		non-significant	non-significant	nodule-enhanced
MergedOrthoGroup001582		non-significant	root-enhanced	nodule-enhanced
MergedOrthoGroup001583		non-significant	non-significant	non-significant
MergedOrthoGroup001585		non-significant	nodule-enhanced	non-significant
MergedOrthoGroup001586		non-significant	non-significant	non-significant
MergedOrthoGroup001587		non-significant	non-significant	non-significant
MergedOrthoGroup001589		non-significant	non-significant	non-significant
MergedOrthoGroup001592Sub001		non-significant	non-significant	non-significant
MergedOrthoGroup001594Sub001		non-significant	non-significant	non-significant
MergedOrthoGroup001595Sub001		non-significant	non-significant	non-significant
MergedOrthoGroup001595Sub002		non-significant	non-significant	non-significant
MergedOrthoGroup001595Sub003		non-significant	non-significant	non-significant
MergedOrthoGroup001595Sub004		non-significant	non-significant	non-significant
MergedOrthoGroup001595Sub005		non-significant	non-significant	non-significant
MergedOrthoGroup001595Sub006		non-significant	non-significant	non-significant
MergedOrthoGroup001597		non-significant	non-significant	nodule-enhanced
MergedOrthoGroup001598		non-significant	non-significant	non-significant
MergedOrthoGroup001599		non-significant	non-significant	non-significant
MergedOrthoGroup001600		non-significant	non-significant	root-enhanced
MergedOrthoGroup001602		non-significant	non-significant	nodule-enhanced
MergedOrthoGroup001603		non-significant	non-significant	non-significant
MergedOrthoGroup001607Sub001		non-significant	non-significant	non-significant
MergedOrthoGroup001607Sub002		non-significant	non-significant	non-significant
MergedOrthoGroup001609		non-significant	non-significant	non-significant
MergedOrthoGroup001611		non-significant	nodule-enhanced	non-significant
MergedOrthoGroup001612Sub001		non-significant	non-significant	non-significant
MergedOrthoGroup001612Sub002		non-significant	non-significant	non-significant
MergedOrthoGroup001612Sub003		non-significant	non-significant	nodule-enhanced
MergedOrthoGroup001614Sub001		root-enhanced	root-enhanced	root-enhanced
MergedOrthoGroup001614Sub002		non-significant	non-significant	non-significant
MergedOrthoGroup001616		non-significant	non-significant	non-significant
MergedOrthoGroup001617Sub001		non-significant	root-enhanced	non-significant
MergedOrthoGroup001622Sub001		non-significant	root-enhanced	non-significant
MergedOrthoGroup001622Sub002		non-significant	non-significant	non-significant
MergedOrthoGroup001625		non-significant	non-significant	non-significant
MergedOrthoGroup001626Sub001		non-significant	non-significant	non-significant
MergedOrthoGroup001627Sub001		non-significant	non-significant	root-enhanced
MergedOrthoGroup001628		non-significant	non-significant	nodule-enhanced
MergedOrthoGroup001632Sub001		non-significant	non-significant	non-significant
MergedOrthoGroup001636		non-significant	non-significant	non-significant
MergedOrthoGroup001638		non-significant	non-significant	non-significant
MergedOrthoGroup001639		non-significant	nodule-enhanced	non-significant
MergedOrthoGroup001640		non-significant	root-enhanced	non-significant
MergedOrthoGroup001641Sub001		non-significant	non-significant	non-significant
MergedOrthoGroup001642		non-significant	non-significant	non-significant
MergedOrthoGroup001643Sub001		non-significant	non-significant	non-significant
MergedOrthoGroup001643Sub002		non-significant	nodule-enhanced	non-significant
MergedOrthoGroup001644Sub001		non-significant	non-significant	non-significant
MergedOrthoGroup001645		non-significant	non-significant	root-enhanced
MergedOrthoGroup001647		non-significant	non-significant	non-significant
MergedOrthoGroup001648		non-significant	non-significant	non-significant
MergedOrthoGroup001649Sub001		non-significant	non-significant	non-significant
MergedOrthoGroup001650		root-enhanced	root-enhanced	non-significant
MergedOrthoGroup001651		non-significant	root-enhanced	root-enhanced
MergedOrthoGroup001652		nodule-enhanced	root-enhanced	root-enhanced
MergedOrthoGroup001653		non-significant	non-significant	nodule-enhanced
MergedOrthoGroup001657		non-significant	root-enhanced	root-enhanced
MergedOrthoGroup001660		non-significant	nodule-enhanced	nodule-enhanced
MergedOrthoGroup001661		non-significant	non-significant	non-significant
MergedOrthoGroup001664		non-significant	non-significant	non-significant
MergedOrthoGroup001666		non-significant	non-significant	root-enhanced
MergedOrthoGroup001669		non-significant	non-significant	non-significant
MergedOrthoGroup001670		non-significant	non-significant	non-significant
MergedOrthoGroup001671		non-significant	non-significant	non-significant
MergedOrthoGroup001674		non-significant	non-significant	non-significant
MergedOrthoGroup001675		root-enhanced	root-enhanced	nodule-enhanced
MergedOrthoGroup001680Sub001		non-significant	non-significant	non-significant
MergedOrthoGroup001681Sub001		non-significant	non-significant	non-significant
MergedOrthoGroup001683Sub001		non-significant	non-significant	non-significant
MergedOrthoGroup001683Sub002		non-significant	non-significant	non-significant
MergedOrthoGroup001684		non-significant	nodule-enhanced	non-significant
MergedOrthoGroup001685		nodule-enhanced	nodule-enhanced	non-significant
MergedOrthoGroup001689		non-significant	non-significant	non-significant
MergedOrthoGroup001690		non-significant	non-significant	non-significant
MergedOrthoGroup001691Sub001		non-significant	nodule-enhanced	nodule-enhanced
MergedOrthoGroup001692		non-significant	root-enhanced	non-significant
MergedOrthoGroup001694		non-significant	non-significant	non-significant
MergedOrthoGroup001695		non-significant	non-significant	non-significant
MergedOrthoGroup001697		non-significant	non-significant	non-significant
MergedOrthoGroup001699		non-significant	non-significant	nodule-enhanced
MergedOrthoGroup001701Sub001		non-significant	non-significant	non-significant
MergedOrthoGroup001701Sub002		non-significant	root-enhanced	root-enhanced
MergedOrthoGroup001704		non-significant	non-significant	root-enhanced
MergedOrthoGroup001706		non-significant	non-significant	root-enhanced
MergedOrthoGroup001708		non-significant	non-significant	non-significant
MergedOrthoGroup001710		non-significant	non-significant	non-significant
MergedOrthoGroup001711		nodule-enhanced	non-significant	root- and nodule-enhanced
MergedOrthoGroup001712		non-significant	root-enhanced	root-enhanced
MergedOrthoGroup001713Sub001		non-significant	non-significant	nodule-enhanced
MergedOrthoGroup001714		non-significant	non-significant	nodule-enhanced
MergedOrthoGroup001715		non-significant	nodule-enhanced	nodule-enhanced
MergedOrthoGroup001716Sub001		non-significant	non-significant	non-significant
MergedOrthoGroup001719		non-significant	non-significant	non-significant
MergedOrthoGroup001720		non-significant	root-enhanced	root-enhanced
MergedOrthoGroup001721Sub001		non-significant	non-significant	non-significant
MergedOrthoGroup001723		non-significant	non-significant	non-significant
MergedOrthoGroup001724		non-significant	non-significant	non-significant
MergedOrthoGroup001725		non-significant	root-enhanced	non-significant
MergedOrthoGroup001727		non-significant	non-significant	nodule-enhanced
MergedOrthoGroup001729		non-significant	non-significant	nodule-enhanced
MergedOrthoGroup001730Sub001		non-significant	non-significant	non-significant
MergedOrthoGroup001731		non-significant	nodule-enhanced	non-significant
MergedOrthoGroup001732		non-significant	non-significant	non-significant
MergedOrthoGroup001733		non-significant	root-enhanced	nodule-enhanced
MergedOrthoGroup001734Sub001		non-significant	non-significant	root-enhanced
MergedOrthoGroup001734Sub002		non-significant	non-significant	non-significant
MergedOrthoGroup001736Sub001		non-significant	non-significant	nodule-enhanced
MergedOrthoGroup001736Sub002		non-significant	non-significant	non-significant
MergedOrthoGroup001736Sub003		root-enhanced	non-significant	root-enhanced
MergedOrthoGroup001736Sub004		non-significant	non-significant	root-enhanced
MergedOrthoGroup001738Sub001		non-significant	non-significant	non-significant
MergedOrthoGroup001739		non-significant	non-significant	non-significant
MergedOrthoGroup001740		non-significant	non-significant	non-significant
MergedOrthoGroup001743Sub001		non-significant	non-significant	non-significant
MergedOrthoGroup001743Sub002		non-significant	nodule-enhanced	non-significant
MergedOrthoGroup001744Sub001		non-significant	non-significant	non-significant
MergedOrthoGroup001746		non-significant	non-significant	root-enhanced
MergedOrthoGroup001747		non-significant	non-significant	non-significant
MergedOrthoGroup001749		non-significant	root-enhanced	root-enhanced
MergedOrthoGroup001753		non-significant	non-significant	non-significant
MergedOrthoGroup001756Sub001		non-significant	non-significant	nodule-enhanced
MergedOrthoGroup001757Sub001		non-significant	non-significant	non-significant
MergedOrthoGroup001757Sub002		non-significant	non-significant	non-significant
MergedOrthoGroup001759Sub001		non-significant	non-significant	non-significant
MergedOrthoGroup001759Sub002		non-significant	nodule-enhanced	non-significant
MergedOrthoGroup001760Sub001		non-significant	non-significant	non-significant
MergedOrthoGroup001760Sub002		non-significant	non-significant	non-significant
MergedOrthoGroup001760Sub003		non-significant	non-significant	non-significant
MergedOrthoGroup001760Sub004		nodule-enhanced	non-significant	non-significant
MergedOrthoGroup001760Sub005		non-significant	non-significant	non-significant
MergedOrthoGroup001760Sub006		non-significant	non-significant	nodule-enhanced
MergedOrthoGroup001763		non-significant	nodule-enhanced	root-enhanced
MergedOrthoGroup001764Sub001		non-significant	root-enhanced	root-enhanced
MergedOrthoGroup001766		non-significant	non-significant	non-significant
MergedOrthoGroup001767		non-significant	non-significant	non-significant
MergedOrthoGroup001770		root-enhanced	non-significant	root-enhanced
MergedOrthoGroup001774		non-significant	root-enhanced	non-significant
MergedOrthoGroup001775		non-significant	non-significant	non-significant
MergedOrthoGroup001776Sub001		non-significant	non-significant	nodule-enhanced
MergedOrthoGroup001778		non-significant	non-significant	root-enhanced
MergedOrthoGroup001779		non-significant	non-significant	non-significant
MergedOrthoGroup001780		non-significant	non-significant	non-significant
MergedOrthoGroup001782		non-significant	non-significant	non-significant
MergedOrthoGroup001783		non-significant	non-significant	nodule-enhanced
MergedOrthoGroup001784		non-significant	non-significant	nodule-enhanced
MergedOrthoGroup001785Sub001		non-significant	nodule-enhanced	root-enhanced
MergedOrthoGroup001786		non-significant	non-significant	non-significant
MergedOrthoGroup001787		non-significant	non-significant	non-significant
MergedOrthoGroup001789		non-significant	non-significant	non-significant
MergedOrthoGroup001790		non-significant	non-significant	root- and nodule-enhanced
MergedOrthoGroup001791Sub001		non-significant	non-significant	nodule-enhanced
MergedOrthoGroup001791Sub002		non-significant	non-significant	root-enhanced
MergedOrthoGroup001792Sub001		non-significant	non-significant	non-significant
MergedOrthoGroup001793		nodule-enhanced	non-significant	nodule-enhanced
MergedOrthoGroup001794		non-significant	root-enhanced	non-significant
MergedOrthoGroup001795		non-significant	non-significant	non-significant
MergedOrthoGroup001797Sub001		non-significant	non-significant	non-significant
MergedOrthoGroup001799Sub001		non-significant	non-significant	non-significant
MergedOrthoGroup001800Sub001		non-significant	non-significant	non-significant
MergedOrthoGroup001800Sub002		non-significant	root-enhanced	non-significant
MergedOrthoGroup001803		non-significant	non-significant	root-enhanced
MergedOrthoGroup001804		non-significant	root-enhanced	non-significant
MergedOrthoGroup001805Sub001		non-significant	non-significant	non-significant
MergedOrthoGroup001806Sub001		non-significant	root-enhanced	non-significant
MergedOrthoGroup001808		non-significant	non-significant	non-significant
MergedOrthoGroup001810Sub001		non-significant	non-significant	non-significant
MergedOrthoGroup001810Sub002		non-significant	nodule-enhanced	non-significant
MergedOrthoGroup001810Sub003		non-significant	non-significant	non-significant
MergedOrthoGroup001811		non-significant	non-significant	non-significant
MergedOrthoGroup001812		non-significant	non-significant	non-significant
MergedOrthoGroup001813		non-significant	non-significant	non-significant
MergedOrthoGroup001816		non-significant	root-enhanced	root-enhanced
MergedOrthoGroup001819Sub001		non-significant	non-significant	nodule-enhanced
MergedOrthoGroup001819Sub002		non-significant	nodule-enhanced	non-significant
MergedOrthoGroup001821		non-significant	nodule-enhanced	non-significant
MergedOrthoGroup001822		non-significant	non-significant	non-significant
MergedOrthoGroup001824Sub001		non-significant	nodule-enhanced	non-significant
MergedOrthoGroup001826		non-significant	non-significant	non-significant
MergedOrthoGroup001827Sub001		non-significant	non-significant	non-significant
MergedOrthoGroup001829		non-significant	non-significant	nodule-enhanced
MergedOrthoGroup001830		non-significant	non-significant	non-significant
MergedOrthoGroup001832Sub001		non-significant	non-significant	nodule-enhanced
MergedOrthoGroup001832Sub002		non-significant	non-significant	non-significant
MergedOrthoGroup001832Sub003		non-significant	root-enhanced	non-significant
MergedOrthoGroup001833		non-significant	non-significant	non-significant
MergedOrthoGroup001834Sub001		non-significant	non-significant	non-significant
MergedOrthoGroup001835Sub001		non-significant	nodule-enhanced	non-significant
MergedOrthoGroup001836Sub001		non-significant	non-significant	non-significant
MergedOrthoGroup001836Sub002		non-significant	nodule-enhanced	non-significant
MergedOrthoGroup001837		non-significant	root-enhanced	root- and nodule-enhanced
MergedOrthoGroup001839Sub001		root-enhanced	root-enhanced	non-significant
MergedOrthoGroup001841		non-significant	nodule-enhanced	non-significant
MergedOrthoGroup001842Sub001		non-significant	non-significant	non-significant
MergedOrthoGroup001842Sub002		non-significant	non-significant	root-enhanced
MergedOrthoGroup001842Sub003		non-significant	root-enhanced	non-significant
MergedOrthoGroup001843		non-significant	non-significant	non-significant
MergedOrthoGroup001844		non-significant	non-significant	non-significant
MergedOrthoGroup001847		root-enhanced	non-significant	nodule-enhanced
MergedOrthoGroup001852		non-significant	root-enhanced	non-significant
MergedOrthoGroup001853Sub001		non-significant	non-significant	nodule-enhanced
MergedOrthoGroup001854		non-significant	non-significant	non-significant
MergedOrthoGroup001855		non-significant	nodule-enhanced	root-enhanced
MergedOrthoGroup001858		root-enhanced	non-significant	non-significant
MergedOrthoGroup001862		non-significant	non-significant	non-significant
MergedOrthoGroup001864		non-significant	non-significant	root-enhanced
MergedOrthoGroup001865		non-significant	root-enhanced	non-significant
MergedOrthoGroup001867		non-significant	non-significant	root-enhanced
MergedOrthoGroup001868Sub001		non-significant	non-significant	root-enhanced
MergedOrthoGroup001870		non-significant	non-significant	root-enhanced
MergedOrthoGroup001873Sub001		non-significant	non-significant	nodule-enhanced
MergedOrthoGroup001874Sub001		non-significant	non-significant	root-enhanced
MergedOrthoGroup001879		non-significant	root-enhanced	root-enhanced
MergedOrthoGroup001881		non-significant	non-significant	non-significant
MergedOrthoGroup001884		non-significant	non-significant	non-significant
MergedOrthoGroup001887		non-significant	non-significant	non-significant
MergedOrthoGroup001888		non-significant	nodule-enhanced	root-enhanced
MergedOrthoGroup001890		non-significant	non-significant	non-significant
MergedOrthoGroup001891		non-significant	nodule-enhanced	nodule-enhanced
MergedOrthoGroup001892		non-significant	root-enhanced	nodule-enhanced
MergedOrthoGroup001894Sub001		non-significant	non-significant	non-significant
MergedOrthoGroup001894Sub002		non-significant	non-significant	non-significant
MergedOrthoGroup001897		non-significant	non-significant	non-significant
MergedOrthoGroup001899Sub001		non-significant	non-significant	non-significant
MergedOrthoGroup001899Sub002		non-significant	non-significant	non-significant
MergedOrthoGroup001899Sub003		non-significant	non-significant	non-significant
MergedOrthoGroup001901		non-significant	non-significant	root-enhanced
MergedOrthoGroup001903		nodule-enhanced	root-enhanced	non-significant
MergedOrthoGroup001904Sub001		non-significant	non-significant	non-significant
MergedOrthoGroup001905		non-significant	non-significant	root-enhanced
MergedOrthoGroup001907		non-significant	non-significant	root-enhanced
MergedOrthoGroup001908Sub001		non-significant	non-significant	non-significant
MergedOrthoGroup001909Sub001		non-significant	root-enhanced	non-significant
MergedOrthoGroup001909Sub002		nodule-enhanced	nodule-enhanced	nodule-enhanced
MergedOrthoGroup001909Sub003		non-significant	nodule-enhanced	non-significant
MergedOrthoGroup001910Sub001		non-significant	non-significant	non-significant
MergedOrthoGroup001912		non-significant	root-enhanced	non-significant
MergedOrthoGroup001913		non-significant	non-significant	non-significant
MergedOrthoGroup001914		non-significant	non-significant	non-significant
MergedOrthoGroup001915		non-significant	non-significant	nodule-enhanced
MergedOrthoGroup001916		non-significant	non-significant	non-significant
MergedOrthoGroup001918		non-significant	non-significant	nodule-enhanced
MergedOrthoGroup001919		non-significant	nodule-enhanced	nodule-enhanced
MergedOrthoGroup001920		non-significant	non-significant	non-significant
MergedOrthoGroup001921		non-significant	non-significant	non-significant
MergedOrthoGroup001922		non-significant	non-significant	root-enhanced
MergedOrthoGroup001923		non-significant	non-significant	nodule-enhanced
MergedOrthoGroup001924Sub001		non-significant	non-significant	non-significant
MergedOrthoGroup001924Sub002		non-significant	non-significant	nodule-enhanced
MergedOrthoGroup001925Sub001		non-significant	non-significant	non-significant
MergedOrthoGroup001925Sub002		root-enhanced	nodule-enhanced	nodule-enhanced
MergedOrthoGroup001926Sub001		non-significant	non-significant	non-significant
MergedOrthoGroup001926Sub002		nodule-enhanced	non-significant	nodule-enhanced
MergedOrthoGroup001930		non-significant	non-significant	non-significant
MergedOrthoGroup001931		non-significant	root-enhanced	non-significant
MergedOrthoGroup001932		non-significant	root-enhanced	root-enhanced
MergedOrthoGroup001934		non-significant	non-significant	root-enhanced
MergedOrthoGroup001936		non-significant	non-significant	non-significant
MergedOrthoGroup001937		non-significant	non-significant	nodule-enhanced
MergedOrthoGroup001938		non-significant	non-significant	non-significant
MergedOrthoGroup001939		non-significant	root-enhanced	root-enhanced
MergedOrthoGroup001942		non-significant	non-significant	non-significant
MergedOrthoGroup001943Sub001		non-significant	nodule-enhanced	non-significant
MergedOrthoGroup001943Sub002		non-significant	non-significant	non-significant
MergedOrthoGroup001944		non-significant	non-significant	non-significant
MergedOrthoGroup001945		root-enhanced	nodule-enhanced	non-significant
MergedOrthoGroup001946		root-enhanced	non-significant	root-enhanced
MergedOrthoGroup001950		non-significant	non-significant	non-significant
MergedOrthoGroup001954		non-significant	non-significant	non-significant
MergedOrthoGroup001955		non-significant	non-significant	non-significant
MergedOrthoGroup001956		non-significant	root-enhanced	nodule-enhanced
MergedOrthoGroup001959		non-significant	non-significant	non-significant
MergedOrthoGroup001960		root-enhanced	non-significant	non-significant
MergedOrthoGroup001962		non-significant	non-significant	non-significant
MergedOrthoGroup001963		non-significant	root-enhanced	root-enhanced
MergedOrthoGroup001964		non-significant	non-significant	non-significant
MergedOrthoGroup001967		non-significant	non-significant	nodule-enhanced
MergedOrthoGroup001968		non-significant	non-significant	non-significant
MergedOrthoGroup001969		non-significant	nodule-enhanced	non-significant
MergedOrthoGroup001970		non-significant	non-significant	non-significant
MergedOrthoGroup001973		non-significant	non-significant	non-significant
MergedOrthoGroup001974		non-significant	non-significant	non-significant
MergedOrthoGroup001975Sub001		non-significant	non-significant	nodule-enhanced
MergedOrthoGroup001977		non-significant	non-significant	non-significant
MergedOrthoGroup001978		non-significant	non-significant	non-significant
MergedOrthoGroup001979		non-significant	non-significant	non-significant
MergedOrthoGroup001981		non-significant	root-enhanced	root-enhanced
MergedOrthoGroup001984Sub001		non-significant	non-significant	non-significant
MergedOrthoGroup001985		non-significant	non-significant	non-significant
MergedOrthoGroup001987		non-significant	non-significant	nodule-enhanced
MergedOrthoGroup001988		non-significant	non-significant	nodule-enhanced
MergedOrthoGroup001989		non-significant	non-significant	non-significant
MergedOrthoGroup001990		non-significant	non-significant	root-enhanced
MergedOrthoGroup001992		non-significant	non-significant	non-significant
MergedOrthoGroup001993Sub001		non-significant	non-significant	non-significant
MergedOrthoGroup001995		non-significant	non-significant	non-significant
MergedOrthoGroup001998Sub001		non-significant	non-significant	non-significant
MergedOrthoGroup001998Sub002		non-significant	non-significant	non-significant
MergedOrthoGroup001999Sub001		non-significant	nodule-enhanced	non-significant
MergedOrthoGroup001999Sub002		non-significant	non-significant	root-enhanced
MergedOrthoGroup002000		non-significant	non-significant	non-significant
MergedOrthoGroup002002		root-enhanced	root-enhanced	root-enhanced
MergedOrthoGroup002003Sub001		non-significant	non-significant	nodule-enhanced
MergedOrthoGroup002003Sub002		non-significant	non-significant	non-significant
MergedOrthoGroup002012		non-significant	non-significant	non-significant
MergedOrthoGroup002013		non-significant	non-significant	non-significant
MergedOrthoGroup002014Sub001		non-significant	nodule-enhanced	non-significant
MergedOrthoGroup002016		non-significant	non-significant	non-significant
MergedOrthoGroup002019		non-significant	non-significant	non-significant
MergedOrthoGroup002020Sub001		non-significant	nodule-enhanced	nodule-enhanced
MergedOrthoGroup002021Sub001		non-significant	non-significant	non-significant
MergedOrthoGroup002021Sub002		non-significant	non-significant	non-significant
MergedOrthoGroup002022Sub001		non-significant	non-significant	non-significant
MergedOrthoGroup002023		non-significant	non-significant	non-significant
MergedOrthoGroup002025		non-significant	root- and nodule-enhanced	root-enhanced
MergedOrthoGroup002027		non-significant	root-enhanced	non-significant
MergedOrthoGroup002028		nodule-enhanced	nodule-enhanced	non-significant
MergedOrthoGroup002029		non-significant	nodule-enhanced	non-significant
MergedOrthoGroup002031		non-significant	non-significant	non-significant
MergedOrthoGroup002032Sub001		non-significant	non-significant	non-significant
MergedOrthoGroup002032Sub002		non-significant	non-significant	non-significant
MergedOrthoGroup002034Sub001		non-significant	non-significant	nodule-enhanced
MergedOrthoGroup002034Sub002		non-significant	non-significant	non-significant
MergedOrthoGroup002035		non-significant	non-significant	nodule-enhanced
MergedOrthoGroup002036Sub001		non-significant	non-significant	non-significant
MergedOrthoGroup002036Sub002		nodule-enhanced	root-enhanced	nodule-enhanced
MergedOrthoGroup002038		non-significant	root-enhanced	non-significant
MergedOrthoGroup002040Sub001		non-significant	non-significant	nodule-enhanced
MergedOrthoGroup002042		non-significant	non-significant	nodule-enhanced
MergedOrthoGroup002043		non-significant	non-significant	non-significant
MergedOrthoGroup002044		root-enhanced	root-enhanced	root-enhanced
MergedOrthoGroup002045Sub001		non-significant	root-enhanced	nodule-enhanced
MergedOrthoGroup002045Sub002		non-significant	non-significant	non-significant
MergedOrthoGroup002047Sub001		non-significant	non-significant	non-significant
MergedOrthoGroup002047Sub002		non-significant	non-significant	non-significant
MergedOrthoGroup002048		non-significant	non-significant	non-significant
MergedOrthoGroup002049Sub001		non-significant	nodule-enhanced	non-significant
MergedOrthoGroup002049Sub002		non-significant	non-significant	non-significant
MergedOrthoGroup002050		non-significant	non-significant	non-significant
MergedOrthoGroup002053Sub001		non-significant	non-significant	non-significant
MergedOrthoGroup002054Sub001		non-significant	non-significant	nodule-enhanced
MergedOrthoGroup002055		non-significant	non-significant	non-significant
MergedOrthoGroup002056		non-significant	nodule-enhanced	nodule-enhanced
MergedOrthoGroup002057		non-significant	non-significant	non-significant
MergedOrthoGroup002058		non-significant	non-significant	non-significant
MergedOrthoGroup002060Sub001		non-significant	non-significant	non-significant
MergedOrthoGroup002062Sub001		non-significant	non-significant	root-enhanced
MergedOrthoGroup002062Sub002		non-significant	non-significant	non-significant
MergedOrthoGroup002063Sub001		non-significant	non-significant	nodule-enhanced
MergedOrthoGroup002065Sub001		non-significant	root-enhanced	non-significant
MergedOrthoGroup002065Sub002		non-significant	non-significant	nodule-enhanced
MergedOrthoGroup002066Sub001		non-significant	non-significant	non-significant
MergedOrthoGroup002066Sub002		non-significant	non-significant	root-enhanced
MergedOrthoGroup002070Sub001		non-significant	non-significant	non-significant
MergedOrthoGroup002070Sub002		non-significant	non-significant	non-significant
MergedOrthoGroup002072		non-significant	nodule-enhanced	non-significant
MergedOrthoGroup002073Sub001		non-significant	root-enhanced	nodule-enhanced
MergedOrthoGroup002073Sub002		non-significant	non-significant	non-significant
MergedOrthoGroup002075		non-significant	nodule-enhanced	non-significant
MergedOrthoGroup002076		non-significant	non-significant	root-enhanced
MergedOrthoGroup002078		non-significant	nodule-enhanced	non-significant
MergedOrthoGroup002080		non-significant	non-significant	non-significant
MergedOrthoGroup002083Sub001		non-significant	non-significant	non-significant
MergedOrthoGroup002083Sub002		non-significant	nodule-enhanced	non-significant
MergedOrthoGroup002087		non-significant	non-significant	nodule-enhanced
MergedOrthoGroup002090		non-significant	non-significant	non-significant
MergedOrthoGroup002091		non-significant	root-enhanced	root-enhanced
MergedOrthoGroup002093		non-significant	non-significant	non-significant
MergedOrthoGroup002094Sub001		nodule-enhanced	root-enhanced	root-enhanced
MergedOrthoGroup002096		non-significant	non-significant	non-significant
MergedOrthoGroup002097Sub001		non-significant	non-significant	non-significant
MergedOrthoGroup002098Sub001		non-significant	root-enhanced	root-enhanced
MergedOrthoGroup002099		non-significant	root-enhanced	non-significant
MergedOrthoGroup002100Sub001		non-significant	non-significant	nodule-enhanced
MergedOrthoGroup002100Sub002		non-significant	non-significant	non-significant
MergedOrthoGroup002101		non-significant	nodule-enhanced	non-significant
MergedOrthoGroup002102		non-significant	nodule-enhanced	non-significant
MergedOrthoGroup002103		non-significant	non-significant	nodule-enhanced
MergedOrthoGroup002109Sub001		non-significant	non-significant	non-significant
MergedOrthoGroup002110		non-significant	non-significant	non-significant
MergedOrthoGroup002111		non-significant	root-enhanced	non-significant
MergedOrthoGroup002112Sub001		nodule-enhanced	non-significant	non-significant
MergedOrthoGroup002112Sub002		root-enhanced	root-enhanced	non-significant
MergedOrthoGroup002113		non-significant	root-enhanced	non-significant
MergedOrthoGroup002115		non-significant	non-significant	non-significant
MergedOrthoGroup002119Sub001		nodule-enhanced	root-enhanced	root-enhanced
MergedOrthoGroup002119Sub002		non-significant	non-significant	nodule-enhanced
MergedOrthoGroup002123		root-enhanced	root-enhanced	non-significant
MergedOrthoGroup002124		root-enhanced	root-enhanced	non-significant
MergedOrthoGroup002125		non-significant	non-significant	nodule-enhanced
MergedOrthoGroup002127		non-significant	root-enhanced	root-enhanced
MergedOrthoGroup002128		non-significant	non-significant	non-significant
MergedOrthoGroup002129Sub001		nodule-enhanced	nodule-enhanced	nodule-enhanced
MergedOrthoGroup002130		non-significant	non-significant	non-significant
MergedOrthoGroup002133Sub001		non-significant	root-enhanced	root-enhanced
MergedOrthoGroup002135		non-significant	root-enhanced	non-significant
MergedOrthoGroup002136Sub001		non-significant	root-enhanced	root-enhanced
MergedOrthoGroup002136Sub002		non-significant	non-significant	nodule-enhanced
MergedOrthoGroup002139Sub001		non-significant	non-significant	non-significant
MergedOrthoGroup002140		non-significant	nodule-enhanced	root-enhanced
MergedOrthoGroup002141		non-significant	root-enhanced	root-enhanced
MergedOrthoGroup002142		non-significant	non-significant	non-significant
MergedOrthoGroup002143		non-significant	non-significant	root-enhanced
MergedOrthoGroup002144		non-significant	nodule-enhanced	root-enhanced
MergedOrthoGroup002147		non-significant	non-significant	nodule-enhanced
MergedOrthoGroup002149Sub001		non-significant	non-significant	root-enhanced
MergedOrthoGroup002151Sub001		non-significant	non-significant	non-significant
MergedOrthoGroup002151Sub002		non-significant	nodule-enhanced	non-significant
MergedOrthoGroup002151Sub003		non-significant	non-significant	non-significant
MergedOrthoGroup002152		non-significant	non-significant	non-significant
MergedOrthoGroup002154Sub001		non-significant	non-significant	nodule-enhanced
MergedOrthoGroup002154Sub002		non-significant	root-enhanced	root-enhanced
MergedOrthoGroup002155		non-significant	non-significant	non-significant
MergedOrthoGroup002156		non-significant	root-enhanced	non-significant
MergedOrthoGroup002157Sub001		non-significant	non-significant	non-significant
MergedOrthoGroup002159		non-significant	non-significant	non-significant
MergedOrthoGroup002160Sub001		non-significant	non-significant	non-significant
MergedOrthoGroup002161		root-enhanced	root-enhanced	nodule-enhanced
MergedOrthoGroup002165Sub001		non-significant	non-significant	non-significant
MergedOrthoGroup002165Sub002		non-significant	root-enhanced	non-significant
MergedOrthoGroup002166		non-significant	non-significant	non-significant
MergedOrthoGroup002172Sub001		non-significant	non-significant	non-significant
MergedOrthoGroup002174		non-significant	non-significant	non-significant
MergedOrthoGroup002177		non-significant	non-significant	non-significant
MergedOrthoGroup002179		non-significant	non-significant	non-significant
MergedOrthoGroup002180Sub001		non-significant	non-significant	non-significant
MergedOrthoGroup002180Sub002		non-significant	non-significant	non-significant
MergedOrthoGroup002181Sub001		non-significant	non-significant	nodule-enhanced
MergedOrthoGroup002182Sub001		non-significant	root-enhanced	root-enhanced
MergedOrthoGroup002182Sub002		non-significant	non-significant	non-significant
MergedOrthoGroup002184Sub001		non-significant	nodule-enhanced	non-significant
MergedOrthoGroup002184Sub002		nodule-enhanced	nodule-enhanced	nodule-enhanced
MergedOrthoGroup002185		non-significant	non-significant	non-significant
MergedOrthoGroup002187		non-significant	non-significant	root-enhanced
MergedOrthoGroup002190Sub001		non-significant	non-significant	nodule-enhanced
MergedOrthoGroup002191		non-significant	root-enhanced	root-enhanced
MergedOrthoGroup002195Sub001		non-significant	non-significant	nodule-enhanced
MergedOrthoGroup002196		non-significant	non-significant	non-significant
MergedOrthoGroup002197		non-significant	root-enhanced	nodule-enhanced
MergedOrthoGroup002199		nodule-enhanced	root-enhanced	root-enhanced
MergedOrthoGroup002201		non-significant	non-significant	non-significant
MergedOrthoGroup002204		root-enhanced	root-enhanced	root-enhanced
MergedOrthoGroup002205		non-significant	root- and nodule-enhanced	nodule-enhanced
MergedOrthoGroup002208		non-significant	non-significant	root-enhanced
MergedOrthoGroup002209		nodule-enhanced	nodule-enhanced	nodule-enhanced
MergedOrthoGroup002210Sub001		non-significant	non-significant	non-significant
MergedOrthoGroup002210Sub002		non-significant	nodule-enhanced	non-significant
MergedOrthoGroup002213		non-significant	non-significant	non-significant
MergedOrthoGroup002214		nodule-enhanced	non-significant	root-enhanced
MergedOrthoGroup002215		non-significant	root-enhanced	non-significant
MergedOrthoGroup002216		non-significant	non-significant	non-significant
MergedOrthoGroup002219Sub001		non-significant	nodule-enhanced	nodule-enhanced
MergedOrthoGroup002221		non-significant	non-significant	root-enhanced
MergedOrthoGroup002222		non-significant	non-significant	non-significant
MergedOrthoGroup002224Sub001		non-significant	non-significant	non-significant
MergedOrthoGroup002225		non-significant	non-significant	non-significant
MergedOrthoGroup002226		non-significant	non-significant	root-enhanced
MergedOrthoGroup002228		non-significant	non-significant	non-significant
MergedOrthoGroup002229		non-significant	non-significant	non-significant
MergedOrthoGroup002230		non-significant	non-significant	non-significant
MergedOrthoGroup002231		non-significant	non-significant	nodule-enhanced
MergedOrthoGroup002232Sub001		root-enhanced	non-significant	root-enhanced
MergedOrthoGroup002232Sub002		non-significant	non-significant	non-significant
MergedOrthoGroup002233		non-significant	root-enhanced	nodule-enhanced
MergedOrthoGroup002234		non-significant	root-enhanced	nodule-enhanced
MergedOrthoGroup002236		non-significant	non-significant	non-significant
MergedOrthoGroup002237Sub001		nodule-enhanced	non-significant	nodule-enhanced
MergedOrthoGroup002239		non-significant	root-enhanced	root-enhanced
MergedOrthoGroup002240		non-significant	non-significant	non-significant
MergedOrthoGroup002241		non-significant	root-enhanced	non-significant
MergedOrthoGroup002242		non-significant	non-significant	nodule-enhanced
MergedOrthoGroup002243		non-significant	non-significant	non-significant
MergedOrthoGroup002244		non-significant	non-significant	root- and nodule-enhanced
MergedOrthoGroup002246		non-significant	non-significant	non-significant
MergedOrthoGroup002249Sub001		non-significant	root-enhanced	non-significant
MergedOrthoGroup002249Sub002		non-significant	non-significant	non-significant
MergedOrthoGroup002251		non-significant	non-significant	non-significant
MergedOrthoGroup002252		non-significant	nodule-enhanced	nodule-enhanced
MergedOrthoGroup002255		root-enhanced	non-significant	non-significant
[truncated: 4,928 more rows]
